# Supplementary material
Source: PubMed Central journal article supplement (PMC10642633)
Supplement: NIHPP2023.01.16.524176V5-supplement-1.pdf [file NIHPP2023.01.16.524176V5-supplement-1.pdf]

1009

1010

1011 **Supplementary Figure S1 | Presence of Opa1 forms per MEF cell line. (a)** (Top) Western blot  
1012 detection of Opa1 forms in indicated MEF cell lines using Opa1 antibody. (Bottom) Actin was used as  
1013 loading control. **(c)** Genetic schematic and cartoon depictions of Opa1 forms present in MEF cell lines  
1014 used in this study.

1015

1016 **Supplementary Figure S2 | Gallery of cryo-ET data. (a)** Summed, projected central slices of cryo-  
1017 electron tomograms visualizing mitochondria in wild-type, Opa1-OE, l-Opa1\*, s-Opa1\* and Opa1-KO  
1018 MEF. White arrowheads indicate calcium deposits, blue arrowheads indicate ellipsoidal mitochondria and  
1019 purple arrowheads indicate round mitochondria. **(b)** Mitochondria size ( $\mu\text{m}^2$ ) broken down by shape per  
1020 cell line. Scatter plots show data distribution, the mean is shown by a bold black line. Significance of  
1021 difference is tested relative to wild type using Mann Whitney; \*\*\*\* $p < 0.0001$ . For b: N refers to number of  
1022 mitochondria: wild-type = 57, Opa1-OE = 17, l-Opa1\* = 39, s-Opa1\* = 55, Opa1-KO = 12. Scale bar =  
1023 200 nm.

1024

1025 **Supplementary Figure S3 | Mitochondrial subcompartment volumes. (a)** Three-dimensional  
1026 renderings of segmented inter-membrane space (IMS, pink surface), cristae lumen (CL, magenta  
1027 surface), and matrix (translucent grey surface) volumes. **(b)** Total mitochondrial volume across  
1028 indicated cell lines. **(c)** Quantification of IMS volume, **(d)** CL volume and **(e)** matrix volume relative to  
1029 total volume of each mitochondrion indicated in (b). **(f)** CL to matrix ratio and **(g)** normalized grey scale  
1030 mitochondrial matrix value across cell lines. **(h)** Graph bar representing percentage of cells with  
1031 detected calcium deposits in cryo-electron tomograms. Scatter plots show data distribution, the mean is  
1032 shown by a bold black line. Significance of difference is tested relative to wild type using Mann Whitney  
1033 test in b, d, e, g; \* $p < 0.05$ , \*\* $p < 0.01$ , \*\*\* $p < 0.001$ , \*\*\*\* $p < 0.0001$ ; and unpaired t test in (c): \*\* $p < 0.01$ ; N  
1034 refers to number of cells, for b-g: N = 5 for all cell lines. For h: N refers to the number of mitochondria:  
1035 wild-type = 57, Opa1-OE = 17, l-Opa1\* = 39, s-Opa1\* = 55, Opa1-KO = 12. Scale bar = 200 nm.

1036

1037 **Supplementary Figure S4 | Cristae analysis. (a)** Cristae density (cristae per  $\mu\text{m}^2$ ) and **(b)** Number of  
1038 cristae per mitochondria represented as scatter plots. **(c)** (Top) Summed, projected central slices of  
1039 cryo-electron tomograms visualizing mitochondria with stacking crista characteristics, supported by 3D  
1040 representations consisting of their sub compartments (bottom) in indicated MEF lines. **(d)** Graph bar  
1041 representing percentage of mitochondria with stacking crista formation in each MEF line. For a: N refers  
1042 to number of cells, N: wild-type = 33, Opa1-OE = 7, l-Opa1\* = 21, s-Opa1\* = 28, Opa1-KO = 11. For b:

1043 N wild-type = 51, Opa1-OE = 17, l-Opa1\* = 39, s-Opa1\* = 55, Opa1-KO = 12. For (c) and (d): N wild-  
1044 type = 57, Opa1-OE = 17, l-Opa1\* = 39, s-Opa1\* = 55, Opa1-KO = 12. Scale bar = 200 nm.

1045

1046 **Supplementary Figure S5 | Mitochondrial network morphology in MEF lines by fluorescence**

1047 **microscopy.** Representative images of mitochondrial morphology in indicated MEF lines labeled with  
1048 MitoTracker™ Deep Red FM. Insets show magnified view of regions indicated with dashed boxes.

1049 Scale bar = 10  $\mu$ m. Inset scale bar = 5  $\mu$ m. **(b)** Graph bar representing mitochondrial network  
1050 morphology scored in indicated MEF lines. N = 100 cells analyzed per cell line.

1051

1052 **Supplementary Figure S6 | Unusual cristae morphology. (a)** Graph bar representing the relative

1053 proportion of unusual cristae morphology observed in indicated MEF lines. Unusual cristae were  
1054 categorized into vesicular, zipped, ring, split, amorphous, straight-across, pinched and loop. N refers to

1055 number of cristae analyzed, N: wild-type = 222, Opa1-OE = 430, l-Opa1\* = 323, s-Opa1\* = 653, Opa1-  
1056 KO = 243. **(b)** Summed, projected central slices of cryo-electron tomograms showing examples of

1057 unusual cristae in mitochondria across cell lines in 2D (top) and 3D (bottom). Loop, ring, straight-  
1058 across, pinched, vesicular, and amorphous cristae are shown. Scale bar = 200 nm.

1059

1060 **Supplementary Figure S7 | Cristae length, width quantification, junction width, angle.**

1061 **(a)** Cartoon schematics representing sub-tomogram averaging (STA) approach for measuring crista  
1062 length and **(b)** width in 3D. **(c)** Cartoon schematic for measurement of cristae junction width and **(d)** angle.

1063 See Methods for details.

1064

1065 **Supplementary Figure S8 | Multijunction cristae. (a)** Scatter plot showing the percentage of

1066 multijunction cristae per mitochondrion in indicated MEF lines. **(b)** Graph bar representing percentage  
1067 of multijunction cristae categorized into straight-across and loop morphology in each MEF line. Scatter

1068 plot shows data distribution, the mean is marked by a bold black line. Significance of difference is

1069 tested relative to wild type using Mann Whitney; \*\*\*\*p<0.0001. N refers to number of cristae, for (a), N:

1070 WT = 18, Opa1-OE = 5, l-Opa1\* = 30, s-Opa1\* = 16, Opa1-KO = 3. For (b), N: WT = 26, Opa1-OE = 9,  
1071 l-Opa1\* = 79, s-Opa1\* = 29, Opa1-KO = 4.

1072

1073 **Supplementary Figure S9 | Cell viability following apoptotic priming.** Assessment of cell viability by

1074 Annexin V staining in MEF cell lines after treatment with the indicated compounds for **(a)** 48 hours and

1075 **(b)** 72 hours. N = minimum 4 biological replicates.

1076

1077 **Supplementary Figure S10 | Oma1<sup>-/-</sup> cell functional characterization. (a)** BH3 profiling of WT and  
1078 Oma1<sup>-/-</sup> MEF for sensitizer BIM BH3 and PUMA. N = 3 biological replicates. **(b)** Representative traces of  
1079 mitochondrial calcium retention capacity assays done in indicated MEF lines. **(c)** OCR plotted against  
1080 time for indicated MEF lines. **(d)** Aspects of mitochondrial respiration; basal respiration rates, the amount  
1081 of respiration used for ATP production, maximum respiration, and spare capacity, are extracted by the  
1082 data plotted in (c). N = 3 biological replicates. Significance of difference between I-Opa1\* and Oma1<sup>-/-</sup> is  
1083 tested using Welch's t-test; \*p<0.05, \*\*p<0.01, \*\*\*p<0.001.

1084

1085 **Supplementary Figure S11 | mtDNA maintenance characterization. (a)** Representative live iSIM  
1086 images of mitochondrial network (PKmito Orange, in green) and nucleoid signal, (SYBR Gold, in  
1087 magenta). **(b)** Quantification of mean nucleoid area and **(c)** total nucleoid number per cell, normalized to  
1088 mitochondrial area and relative to the experimental controls (median of WT cells imaged on the same  
1089 day). Significance of difference is tested relative to wild type using Mann Whitney; \*p<0.05, \*\*p<0.01,  
1090 \*\*\*p<0.001, \*\*\*\*p<0.0001. N refers to the number of quantified cells per MEF line, WT = 83, Opa1-OE  
1091 =51, I-Opa1\* = 31, s-Opa1\* = 55, Opa1-KO = 58. **(d)** qPCR-based determination of mtDNA (RNR2 and  
1092 ND1 probes) copy number relative to nuclear genome copies (HK2 probe), normalized to WT cells.  
1093 Significance of difference is tested relative to wild type using Welch's t-test; \*\*p<0.001. N refers to 3  
1094 biological replicates. Scale bar = 10 μm.

1095

1097 **Movie 1:** 3D renderings of WT mitochondrial membranes (OMM in green and IMM in yellow) and  
1098 subcompartments (IMS in pink and CL in magenta) on tomogram Z slices in XY orientation. Scale bar =  
1099 200 nm.

1100

1101 **Movie 2:** 3D renderings of Opa1-OE mitochondrial membranes (OMM in green and IMM in yellow) and  
1102 subcompartments (IMS in pink and CL in magenta) on tomogram Z slices in XY orientation. Scale bar =  
1103 200 nm.

1104

1105 **Movie 3:** 3D renderings of l-Opa1\* mitochondrial membranes (OMM in green and IMM in yellow) and  
1106 subcompartments (IMS in pink and CL in magenta) on tomogram Z slices in XY orientation. Scale bar =  
1107 200 nm.

1108

1109 **Movie 4:** 3D renderings of s-Opa1\* mitochondrial membranes (OMM in green and IMM in yellow) and  
1110 subcompartments (IMS in pink and CL in magenta) on tomogram Z slices in XY orientation. Scale bar =  
1111 200 nm.

1112

1113 **Movie 5:** 3D renderings of Opa1-KO mitochondrial membranes (OMM in green and IMM in yellow) and  
1114 subcompartments (IMS in pink and CL in magenta) on tomogram Z slices in XY orientation. Scale bar =  
1115 200 nm.

1116

1117 **Movie 6:** Live-cell fluorescence microscopy of MitoTracker<sup>TM</sup> Deep Red FM-stained mitochondria in  
1118 indicated MEF cell lines. Movies were taken at 30 seconds per frame for 5 mins. Playback at 2 frames  
1119 per second (60x real-time). Scale bar = 10  $\mu$ m.

1120

a

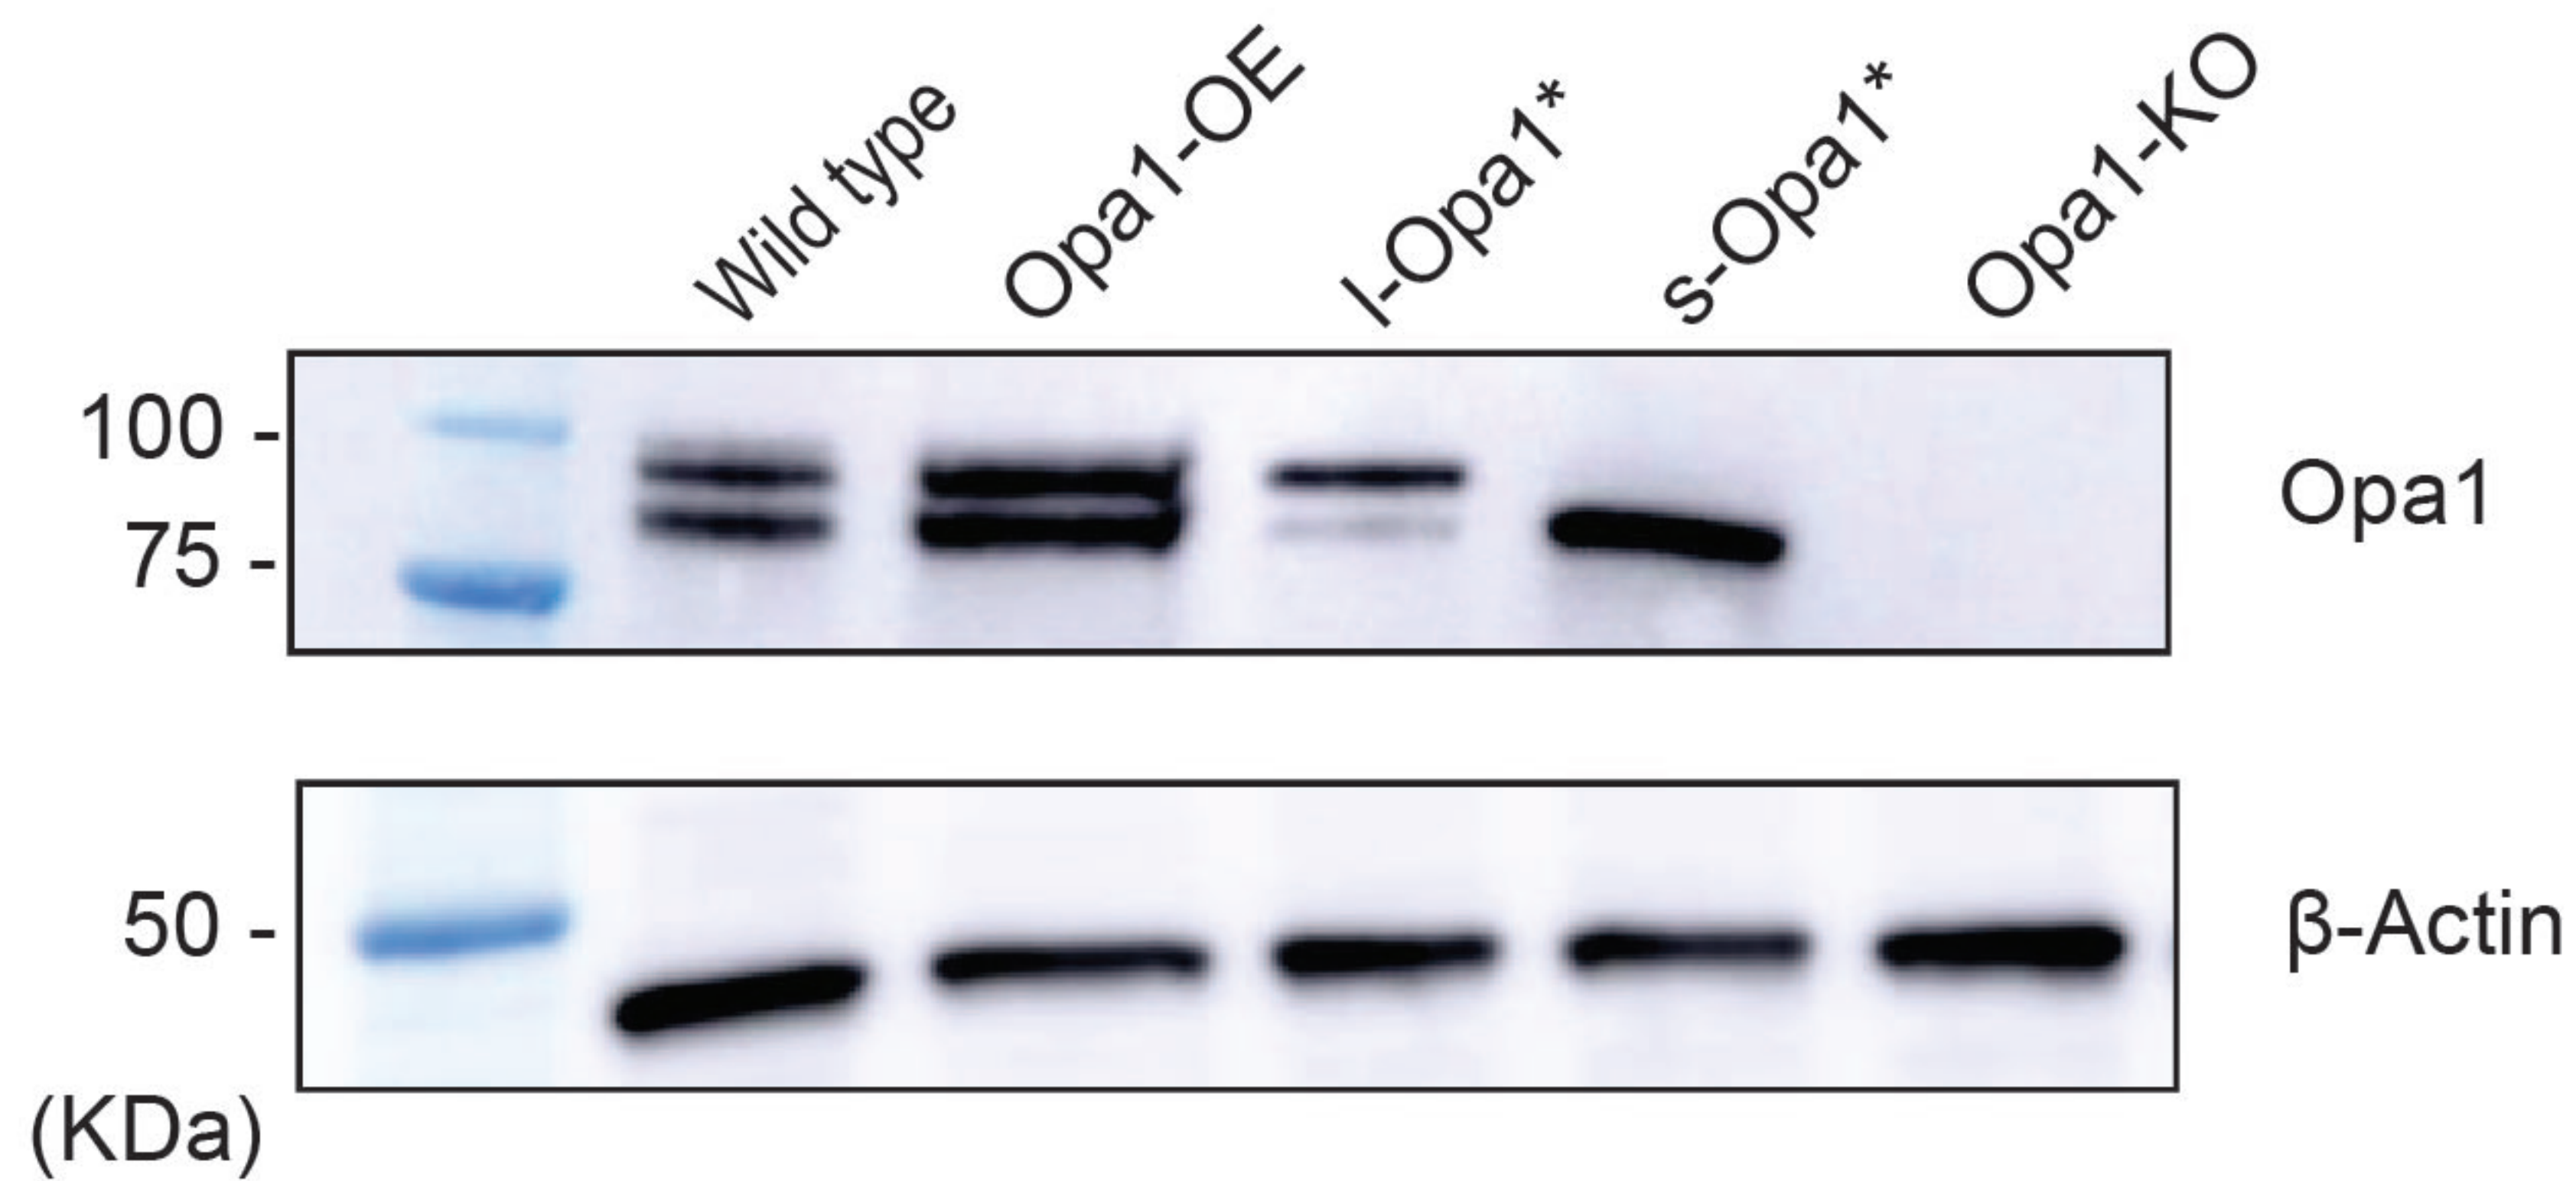

b

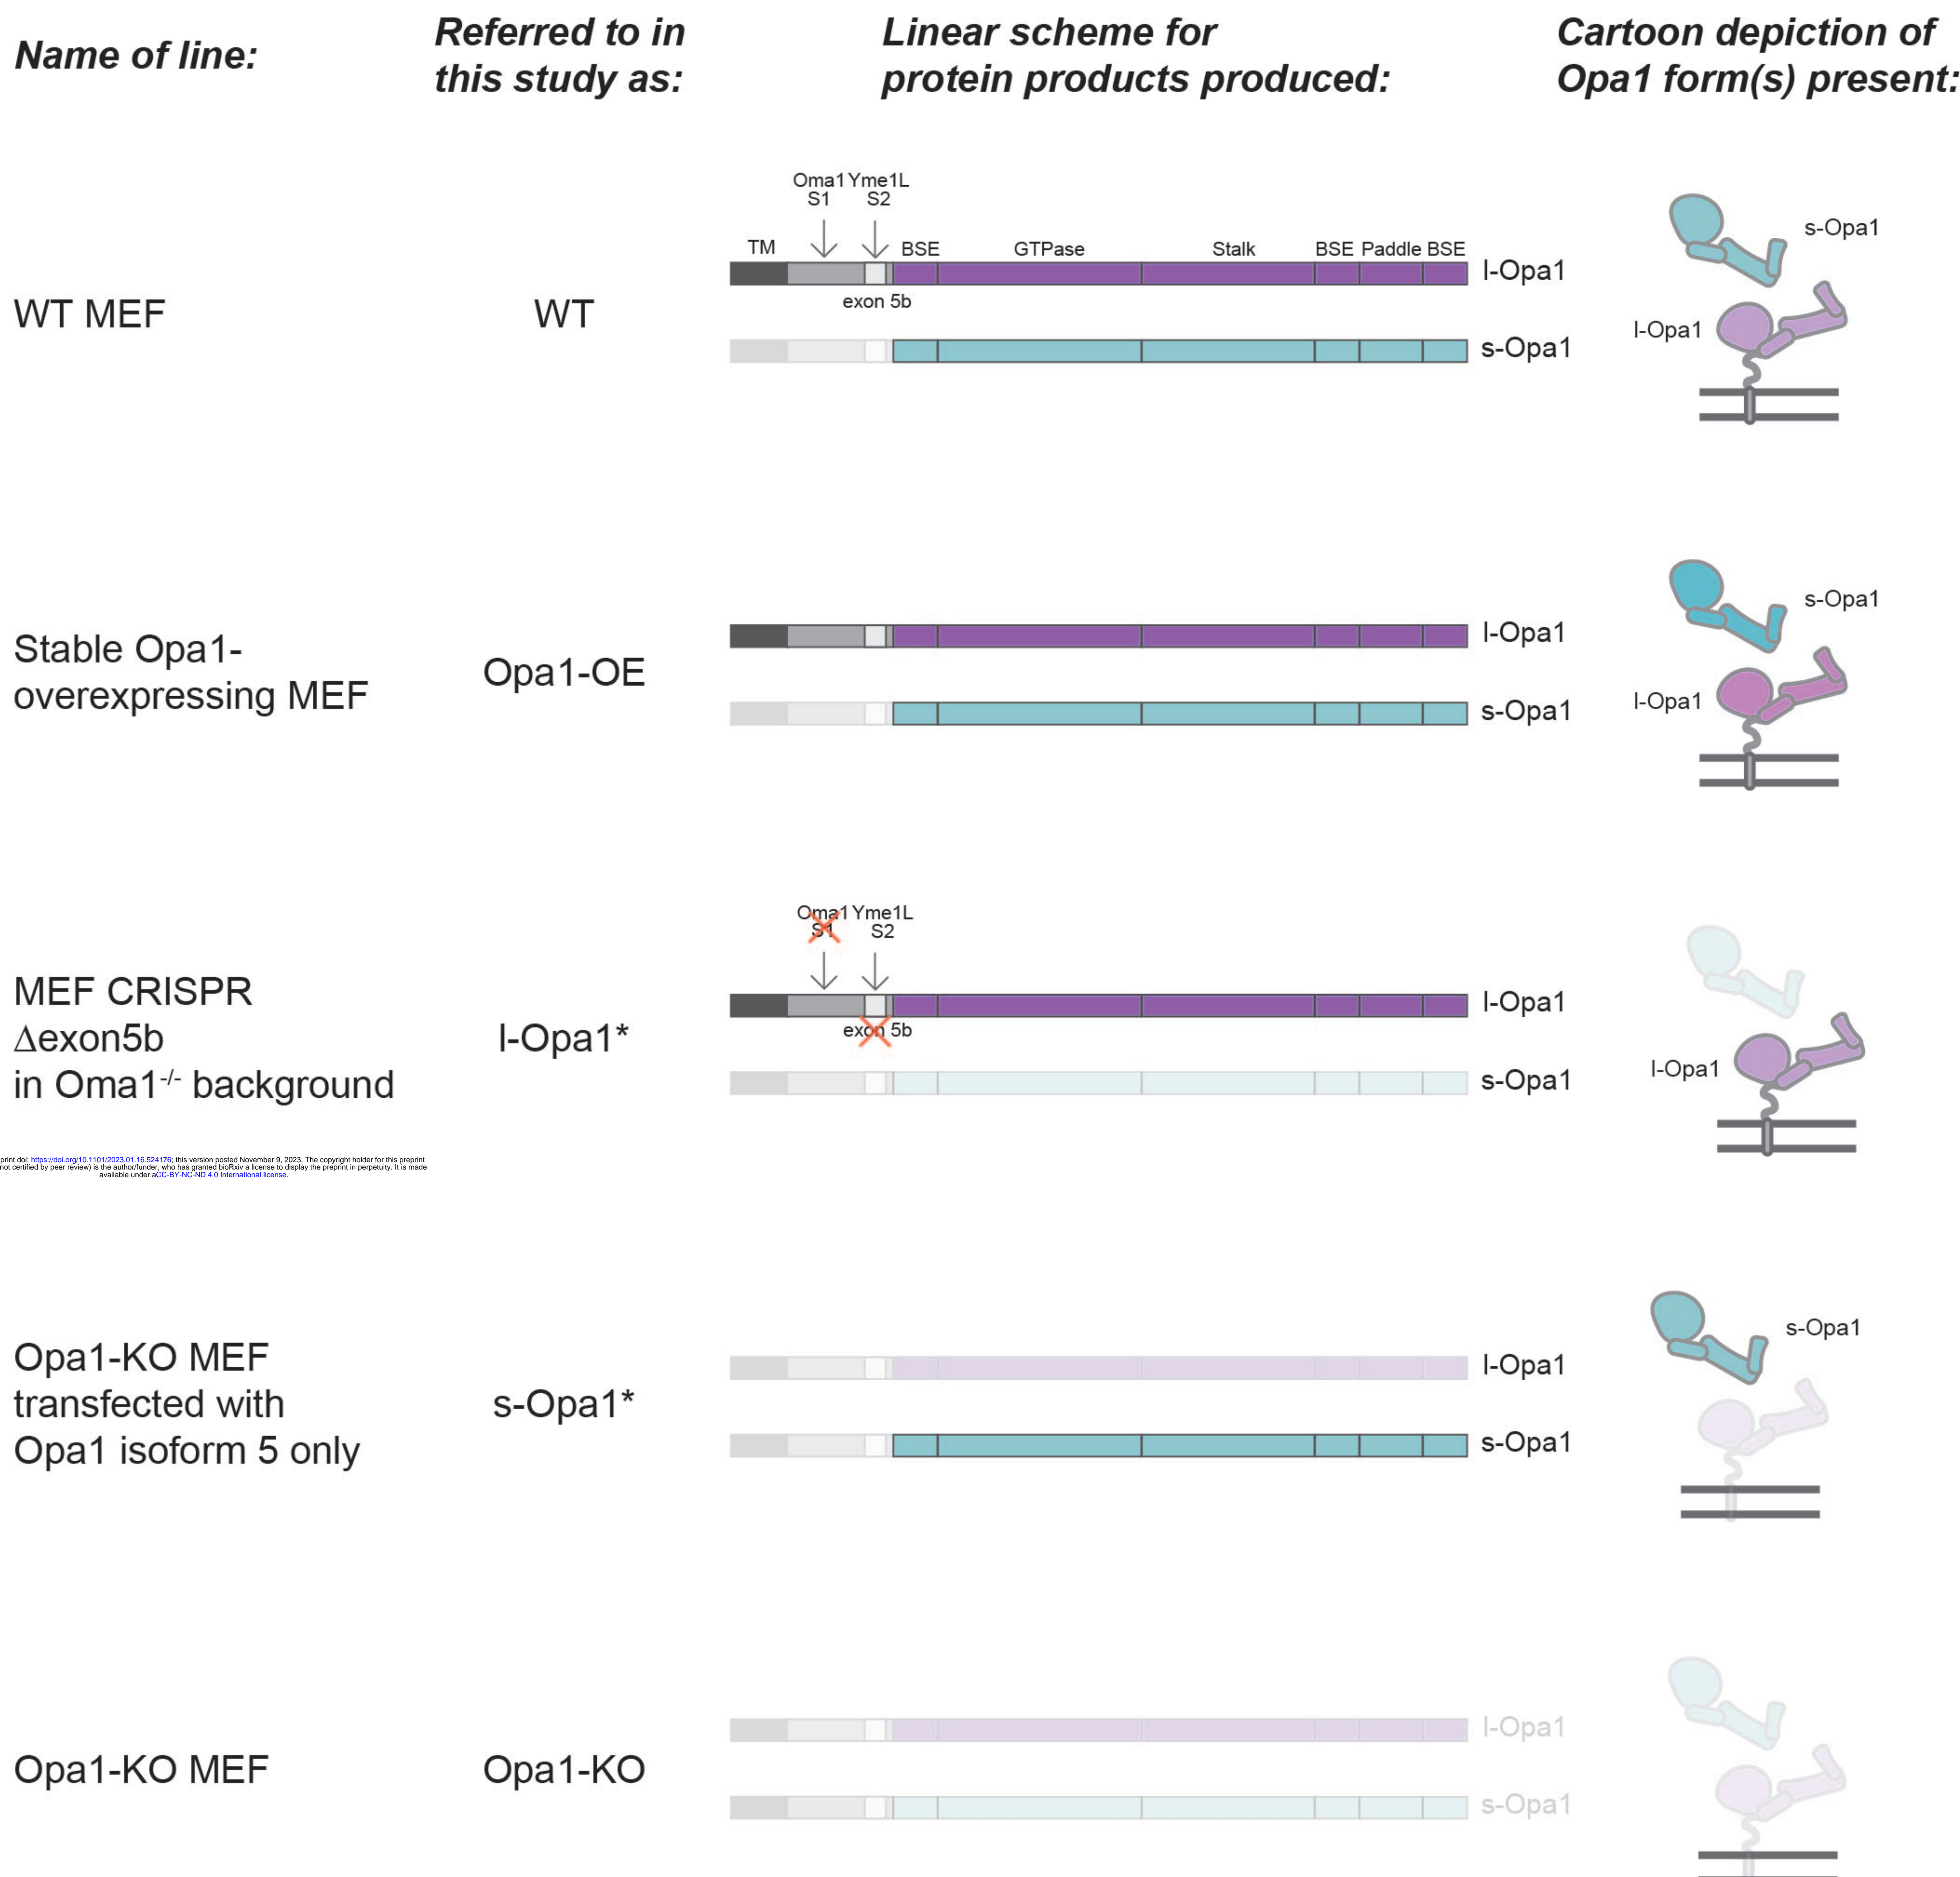

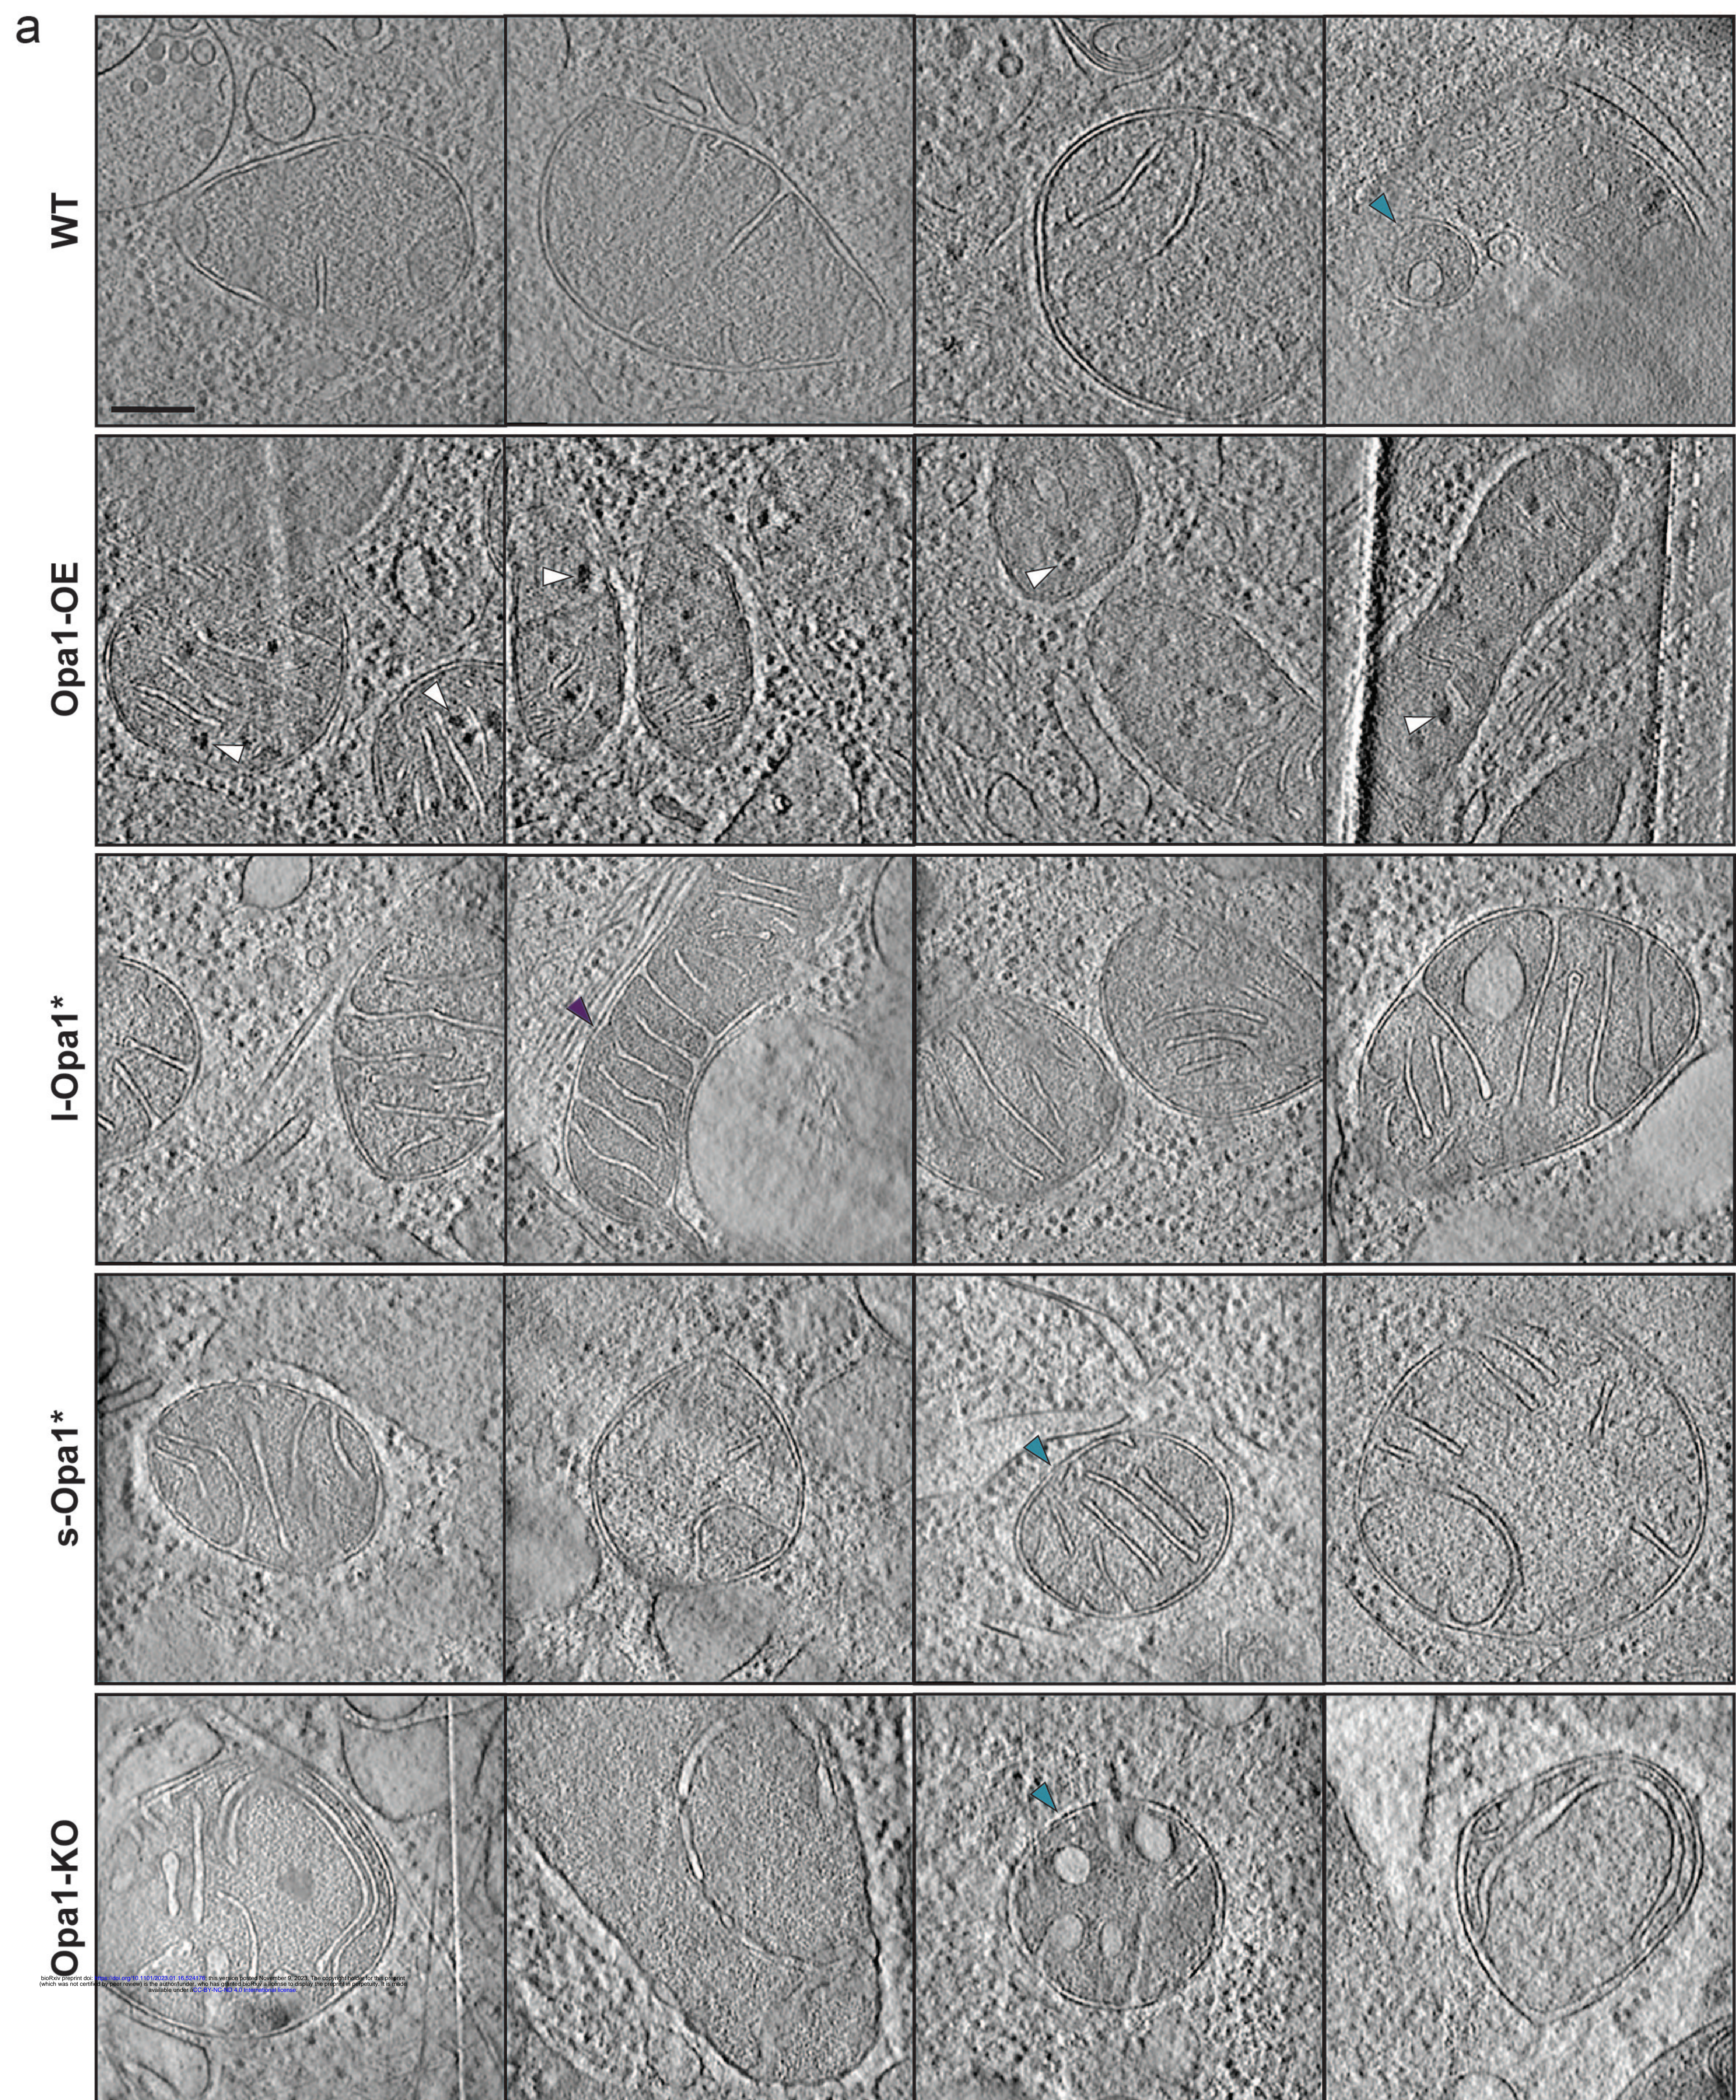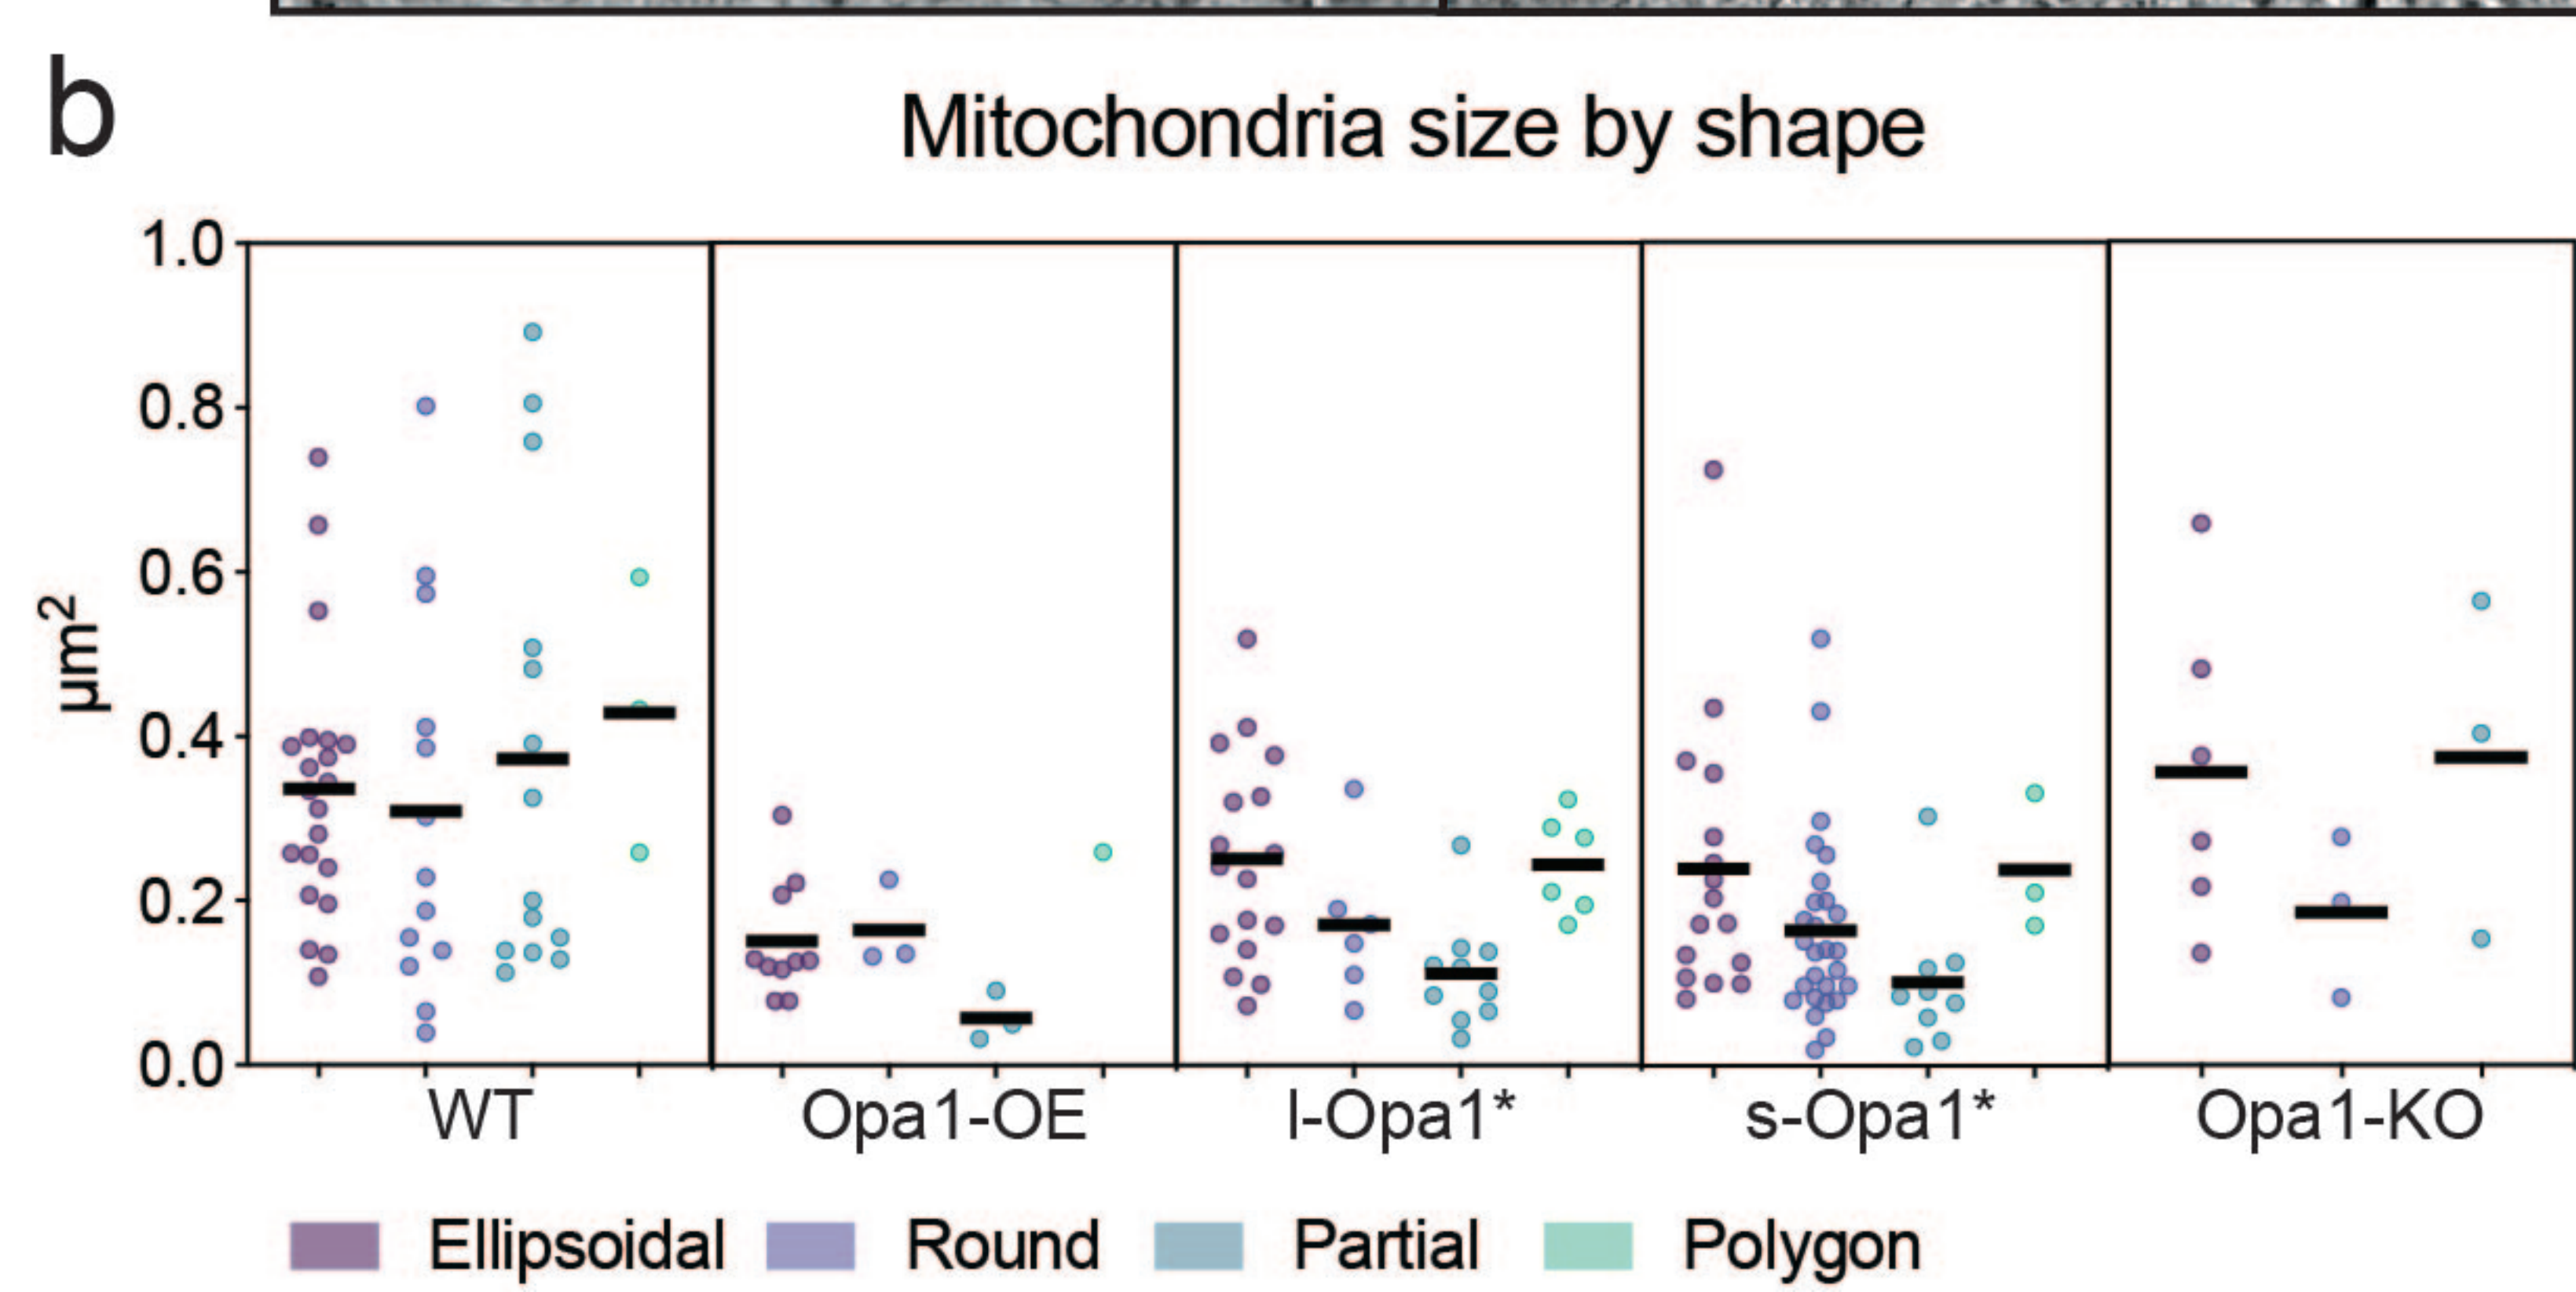

**a**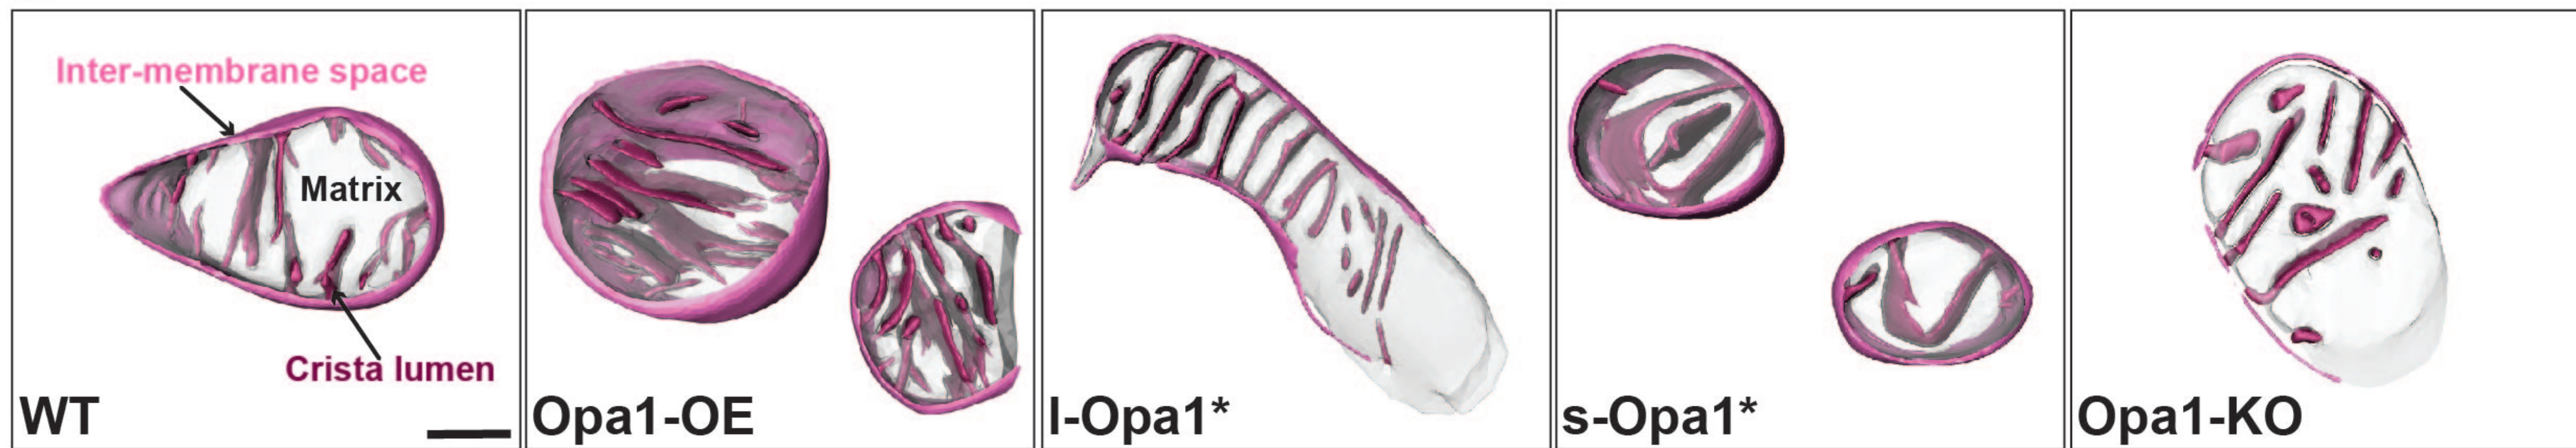**b**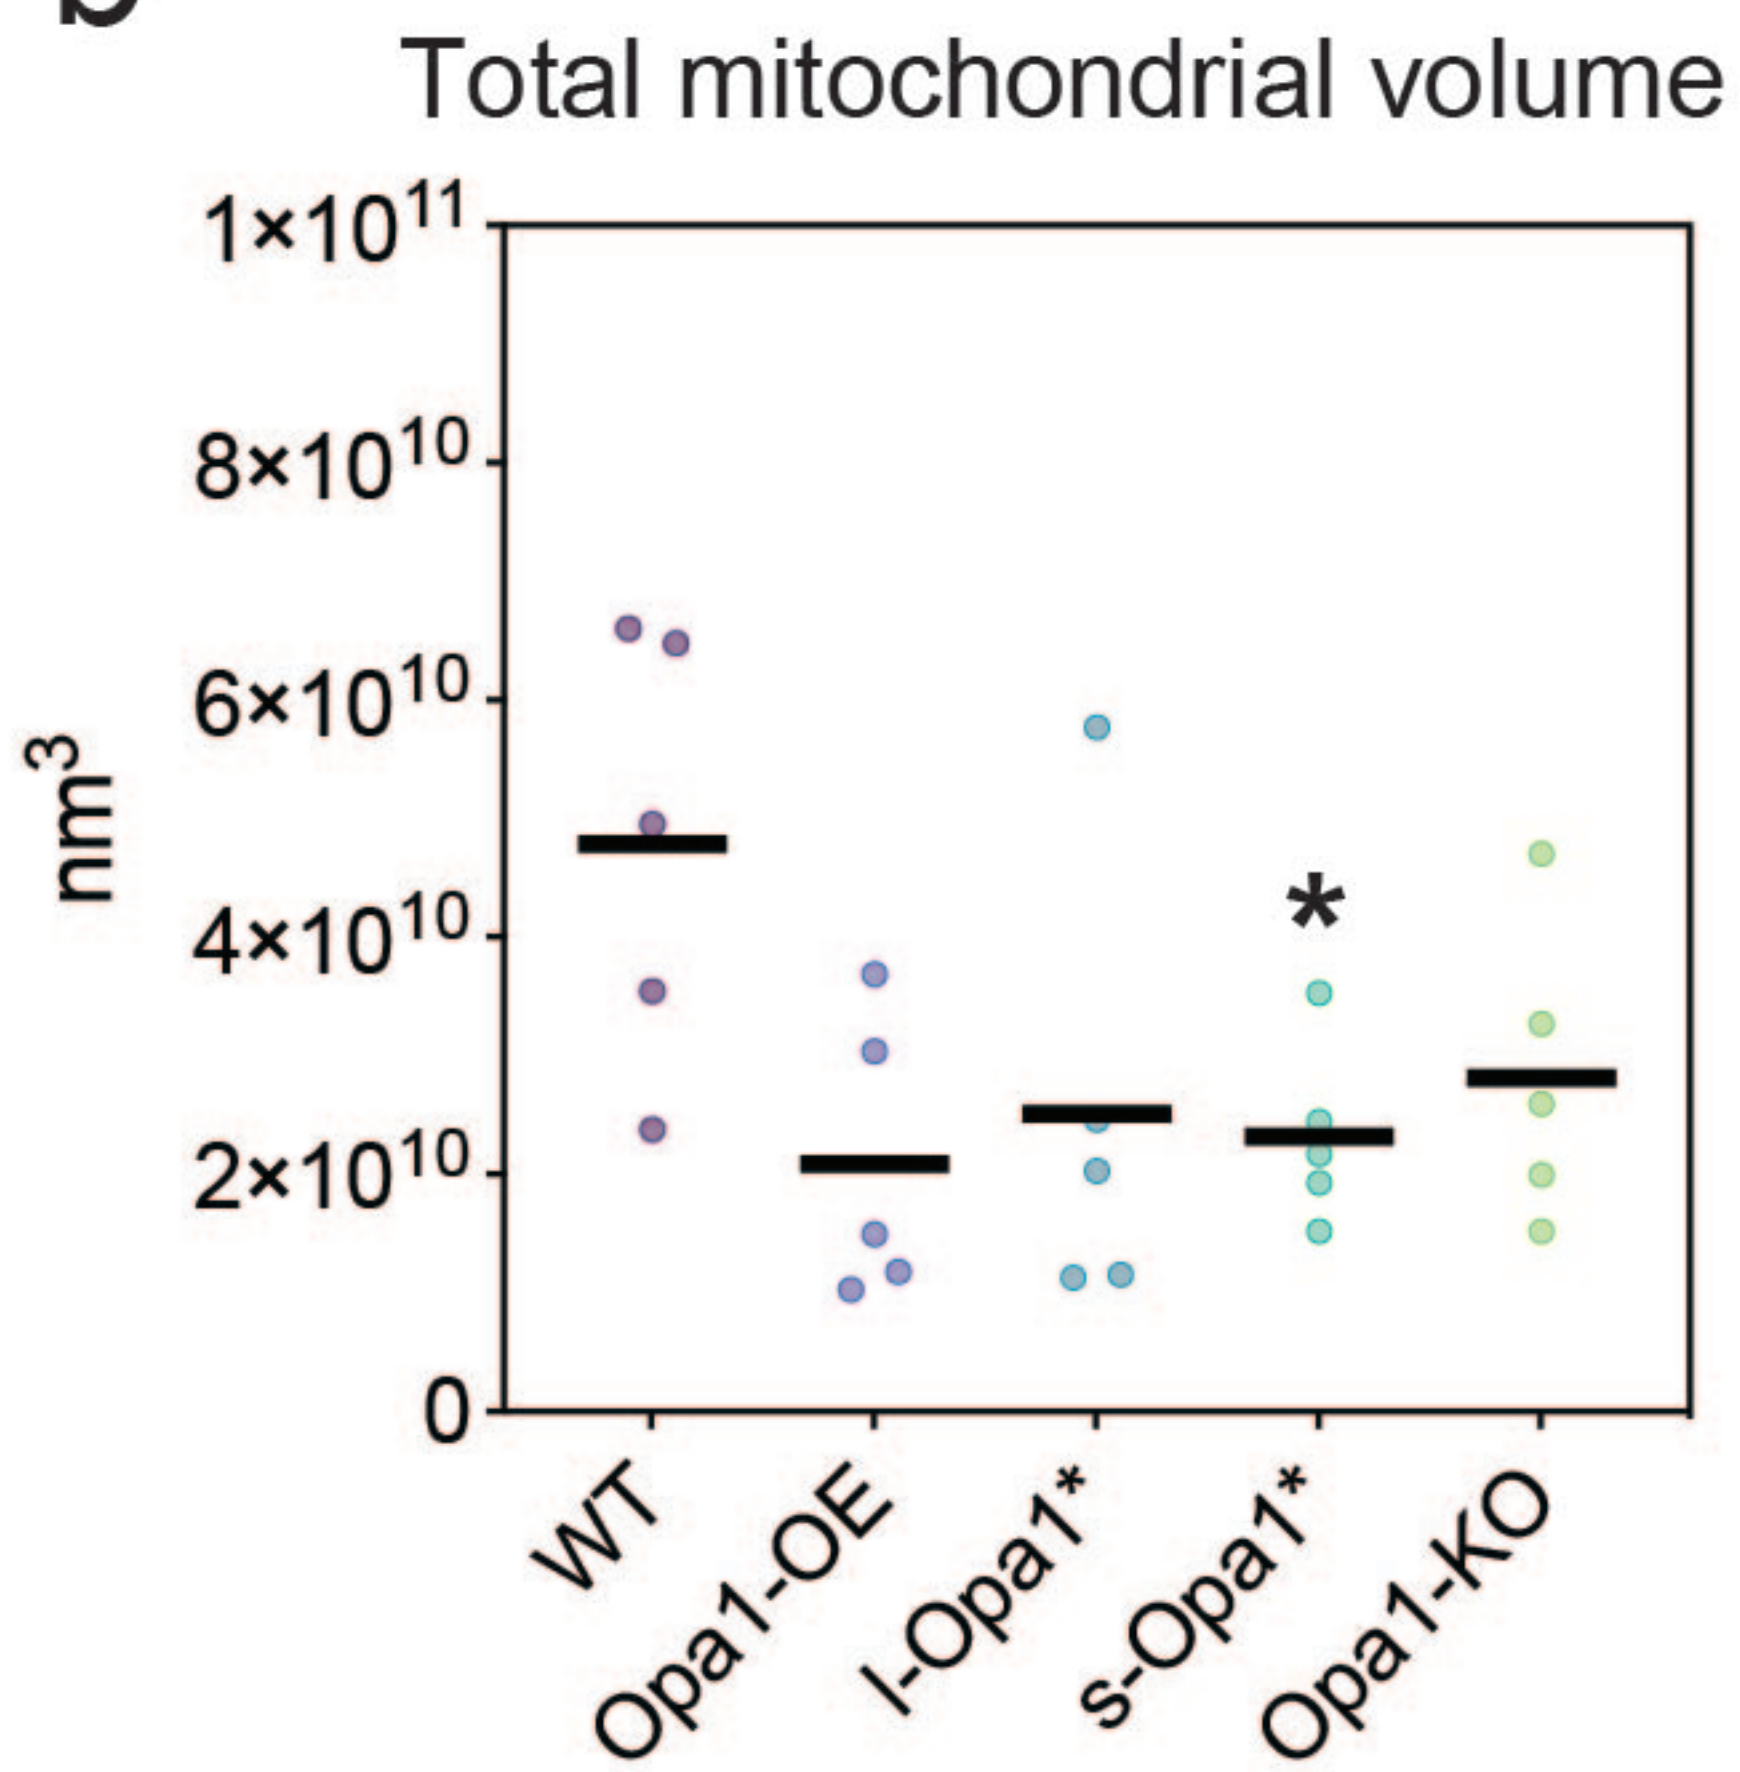**c**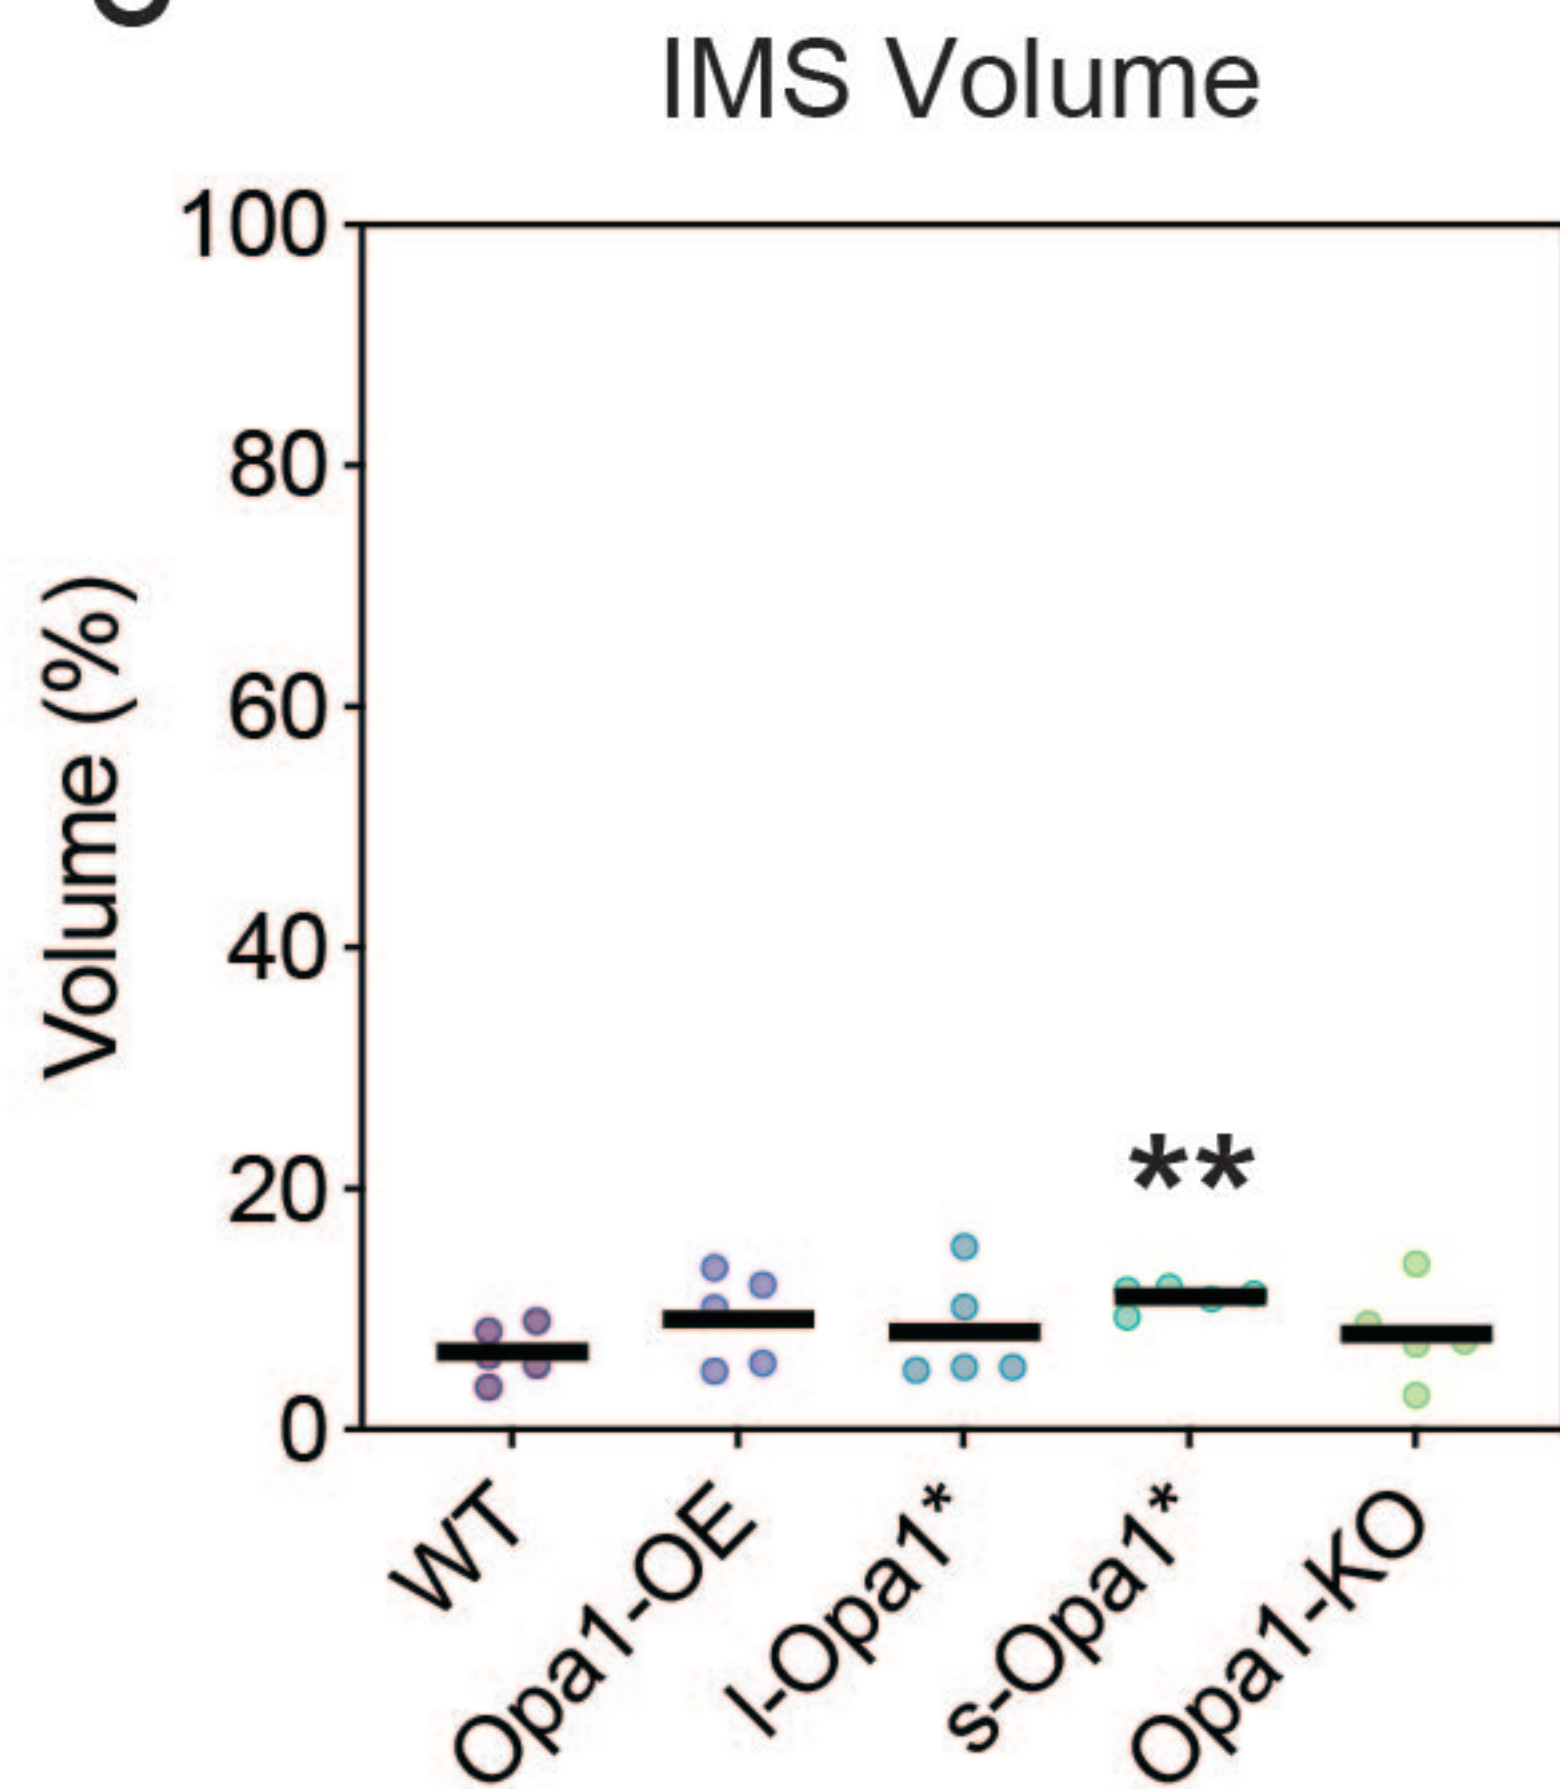**d**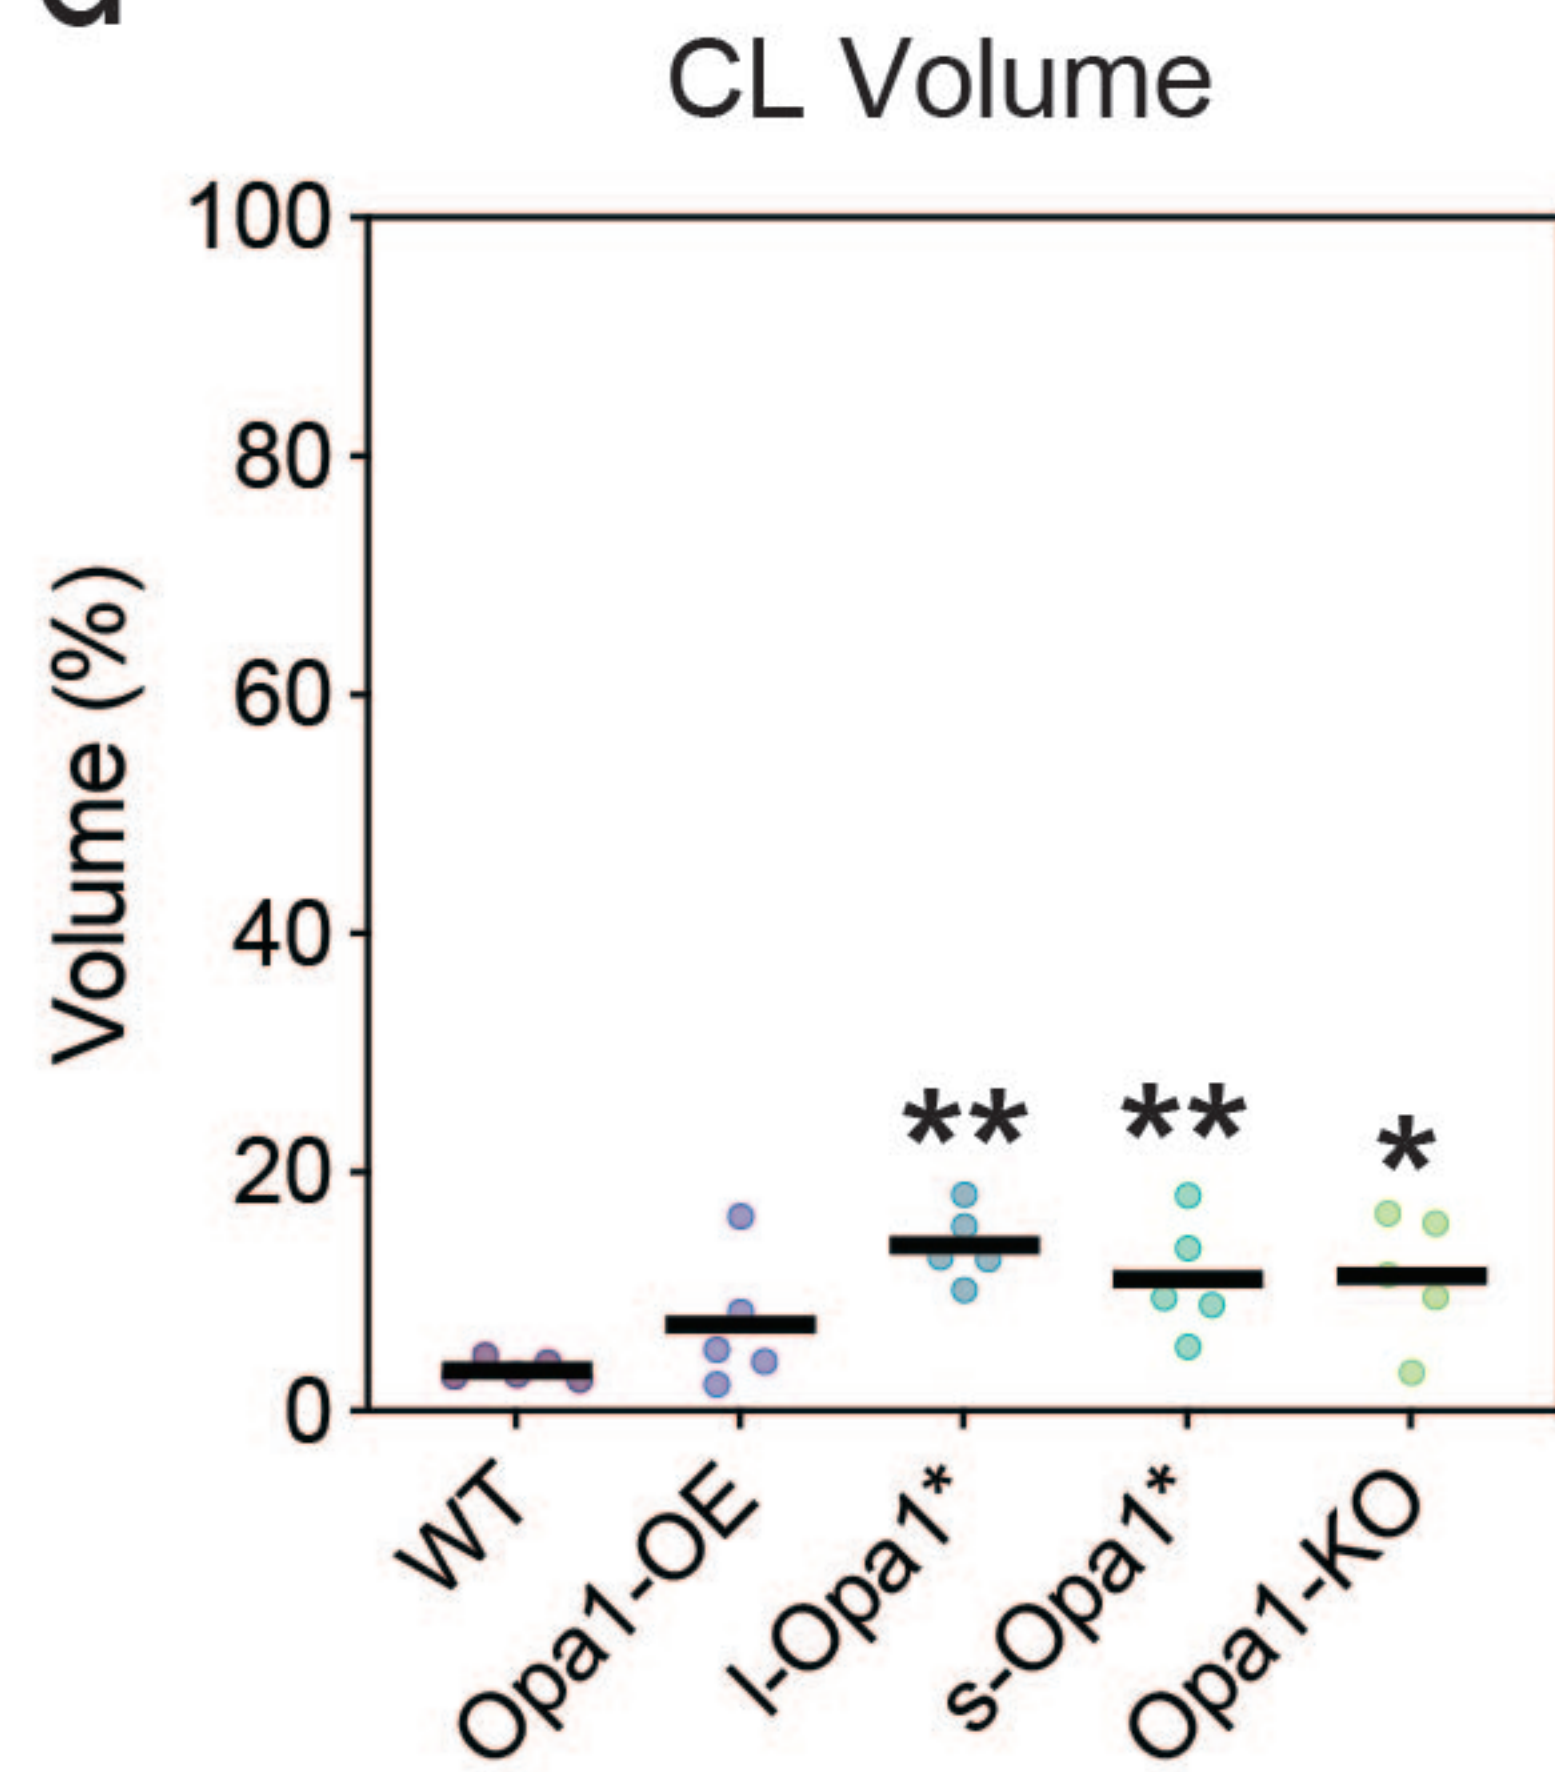**e**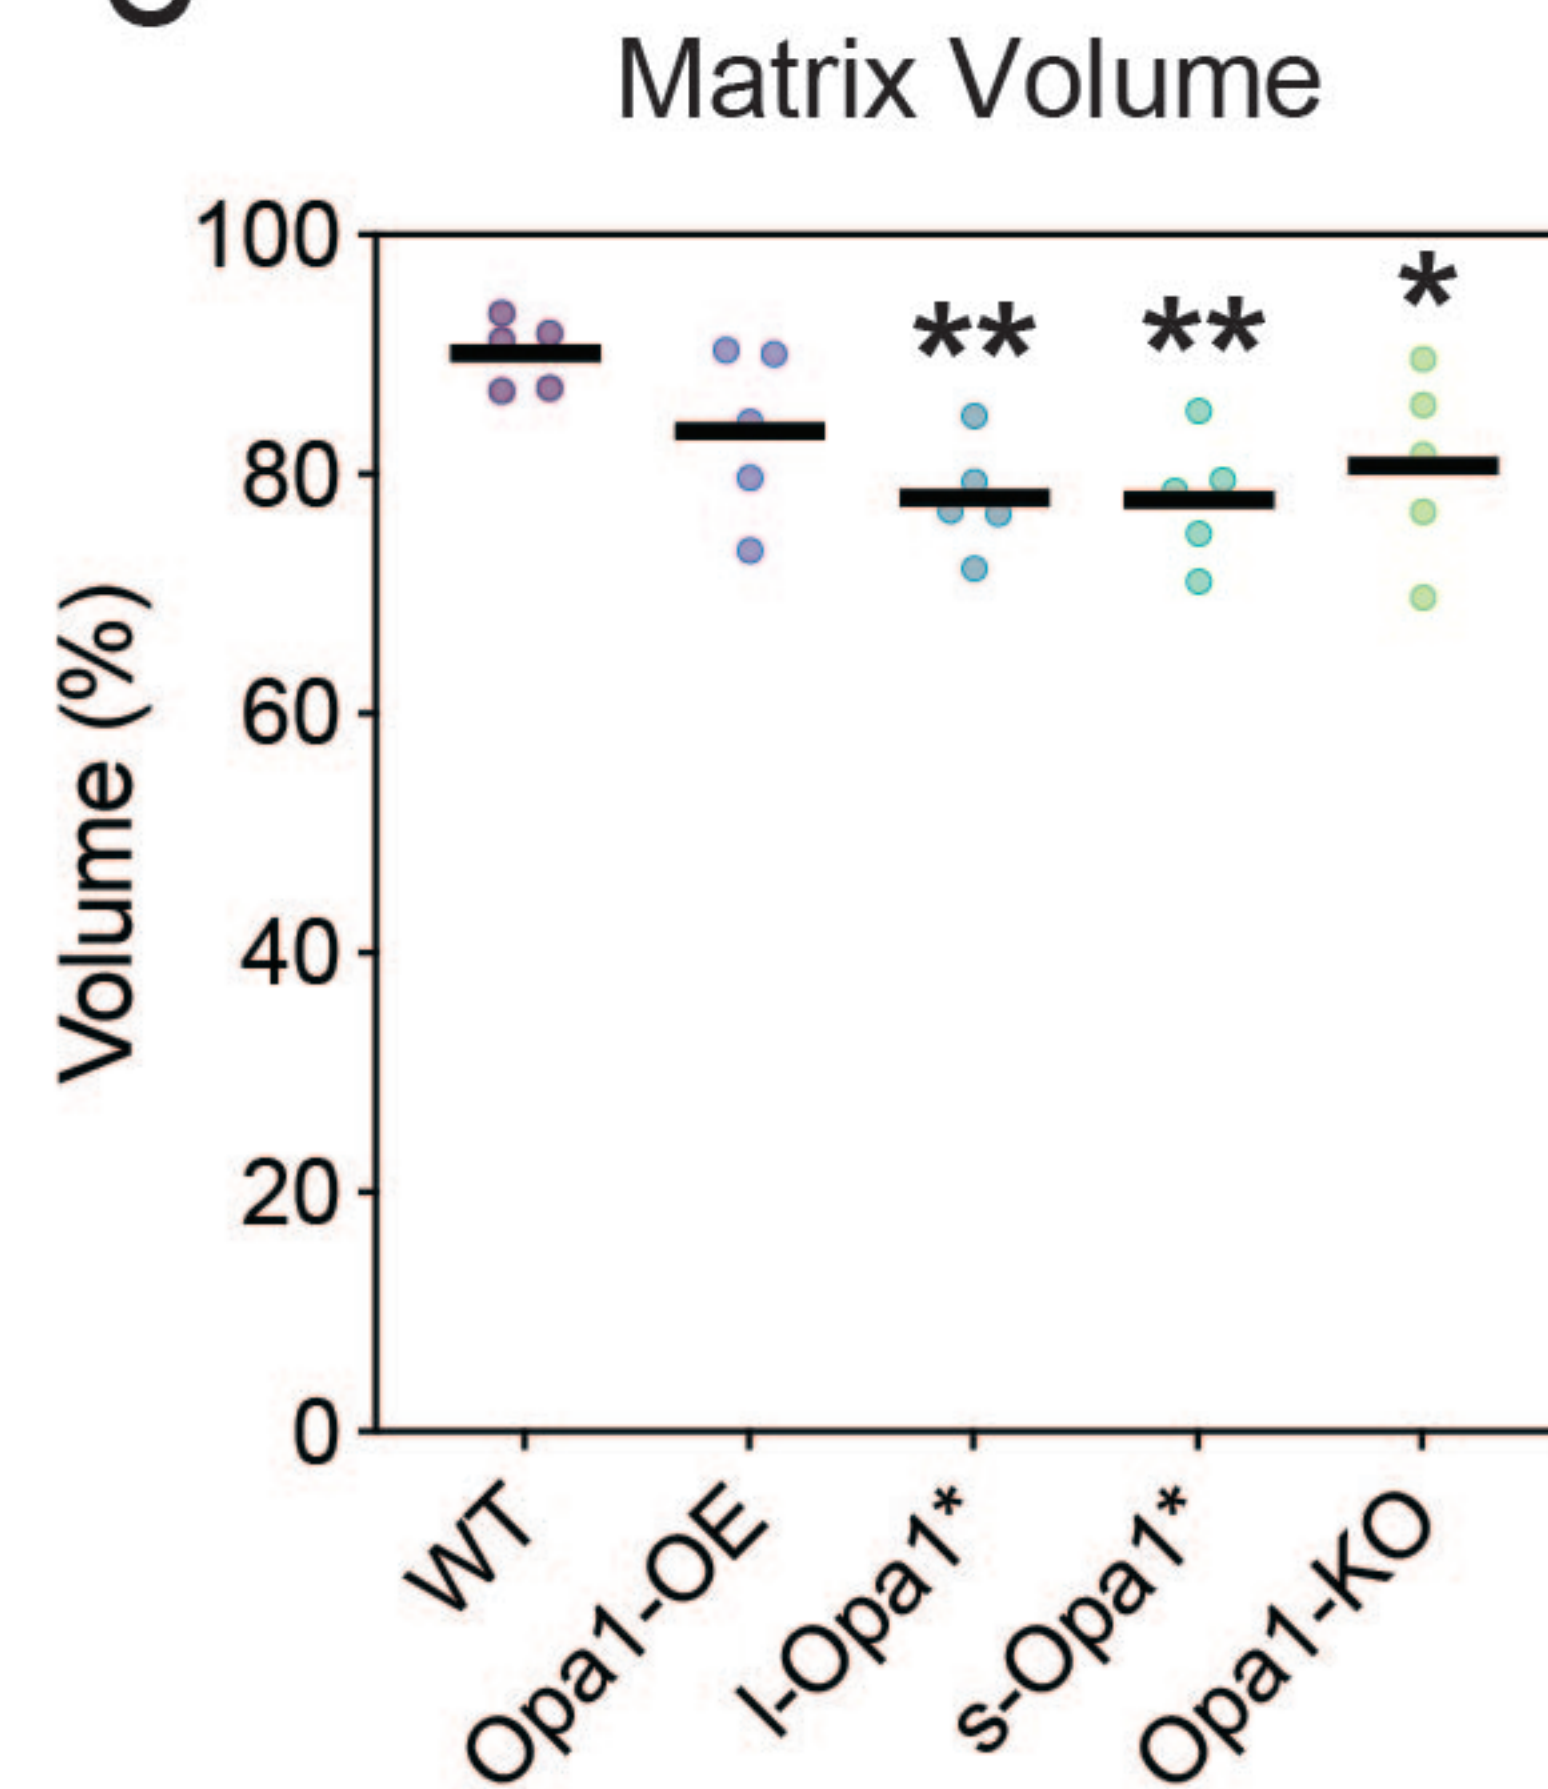**f**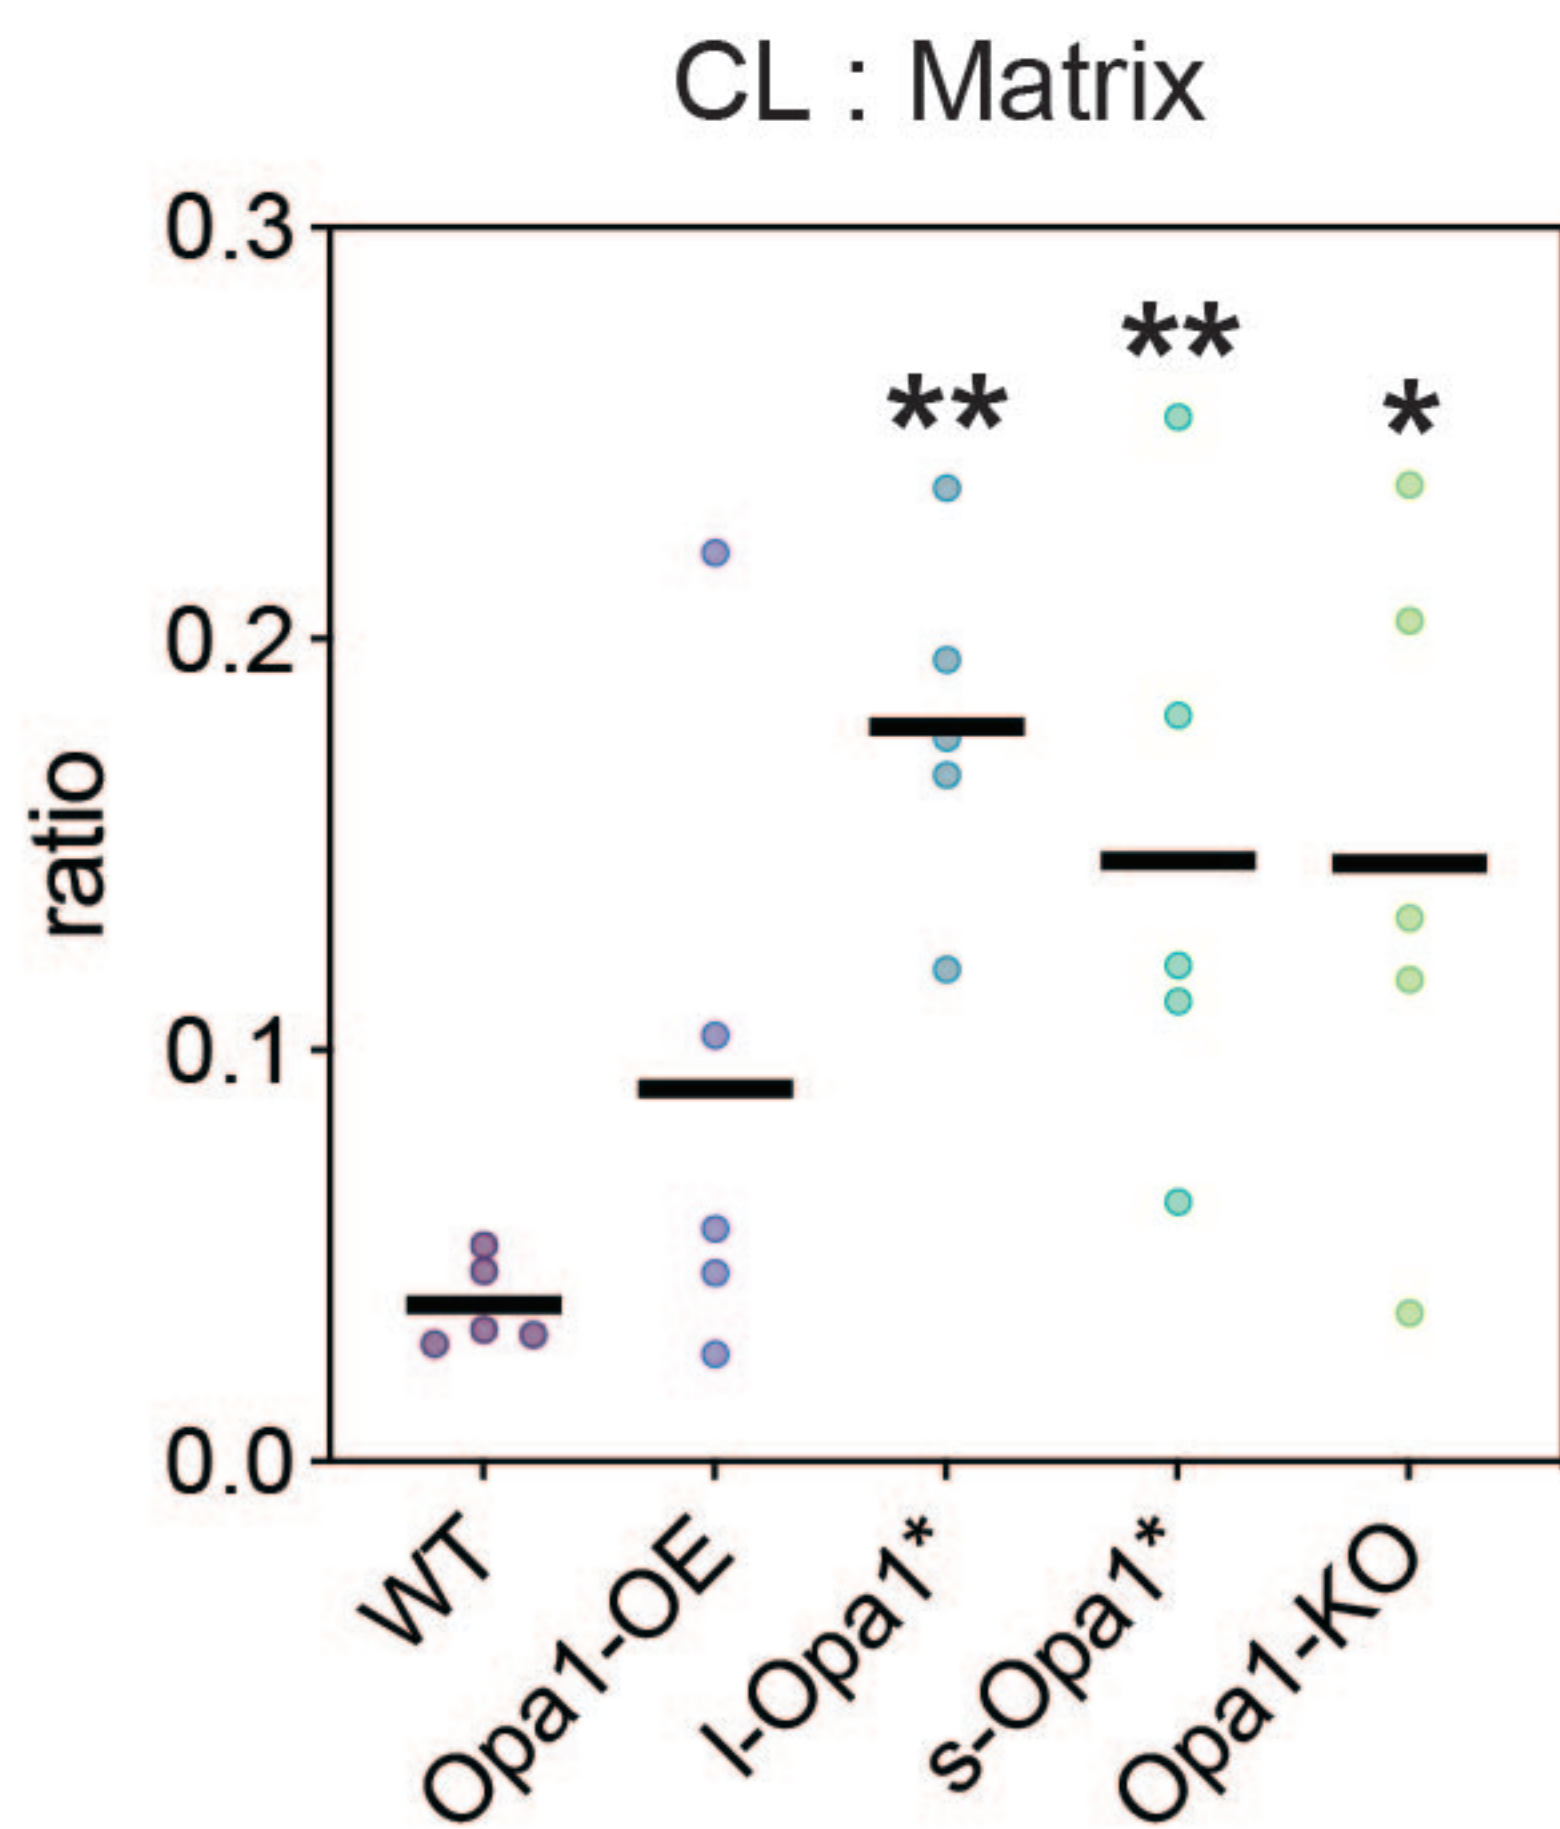**g**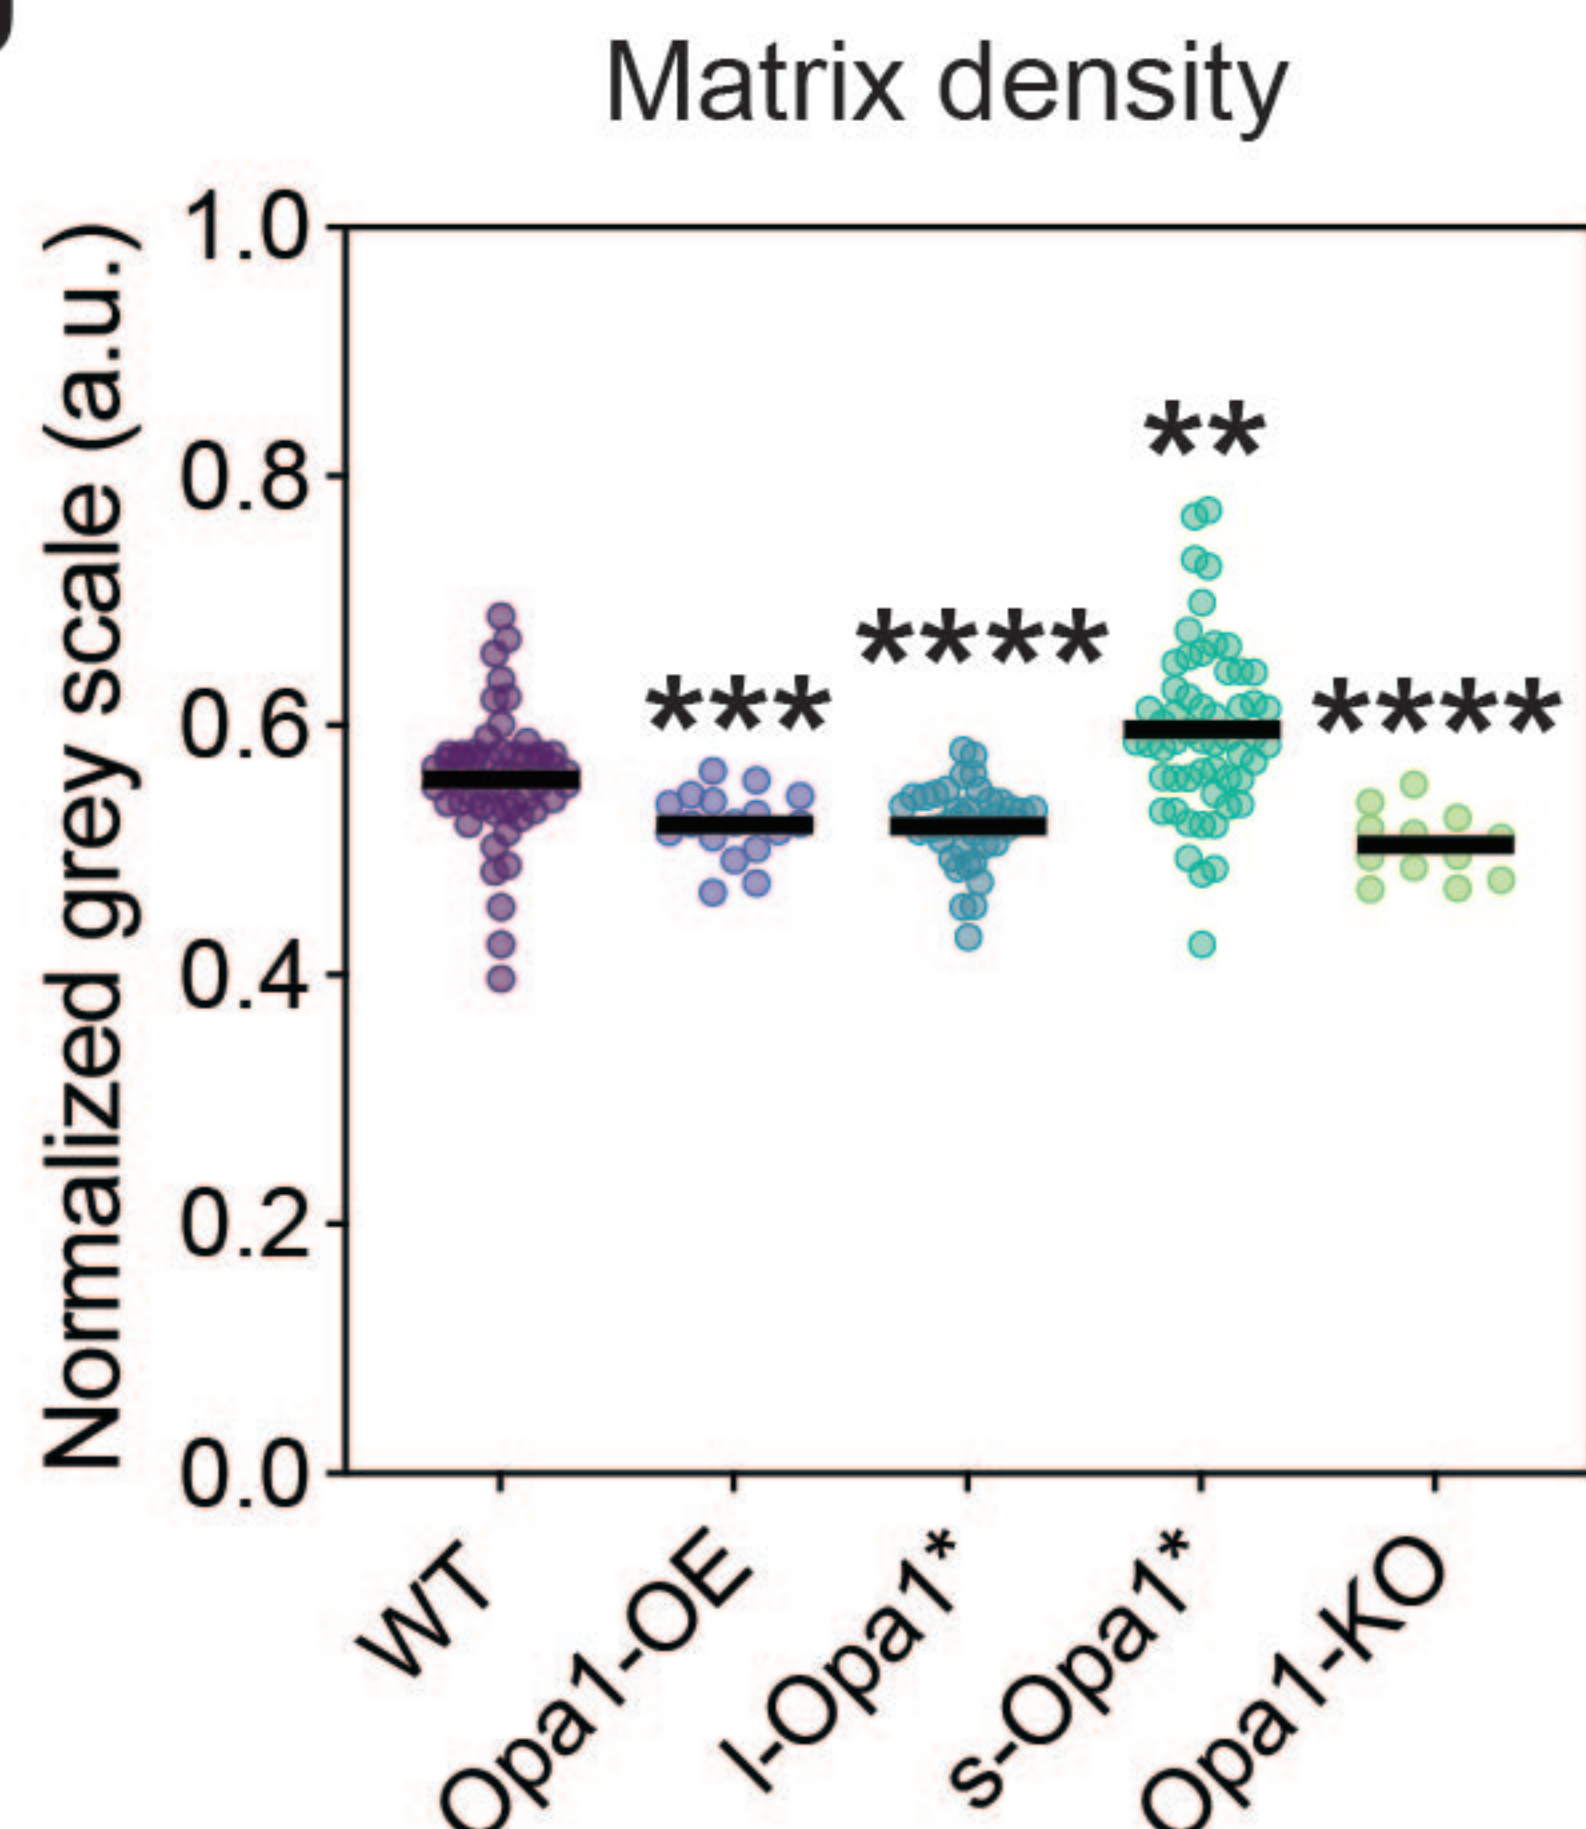**h**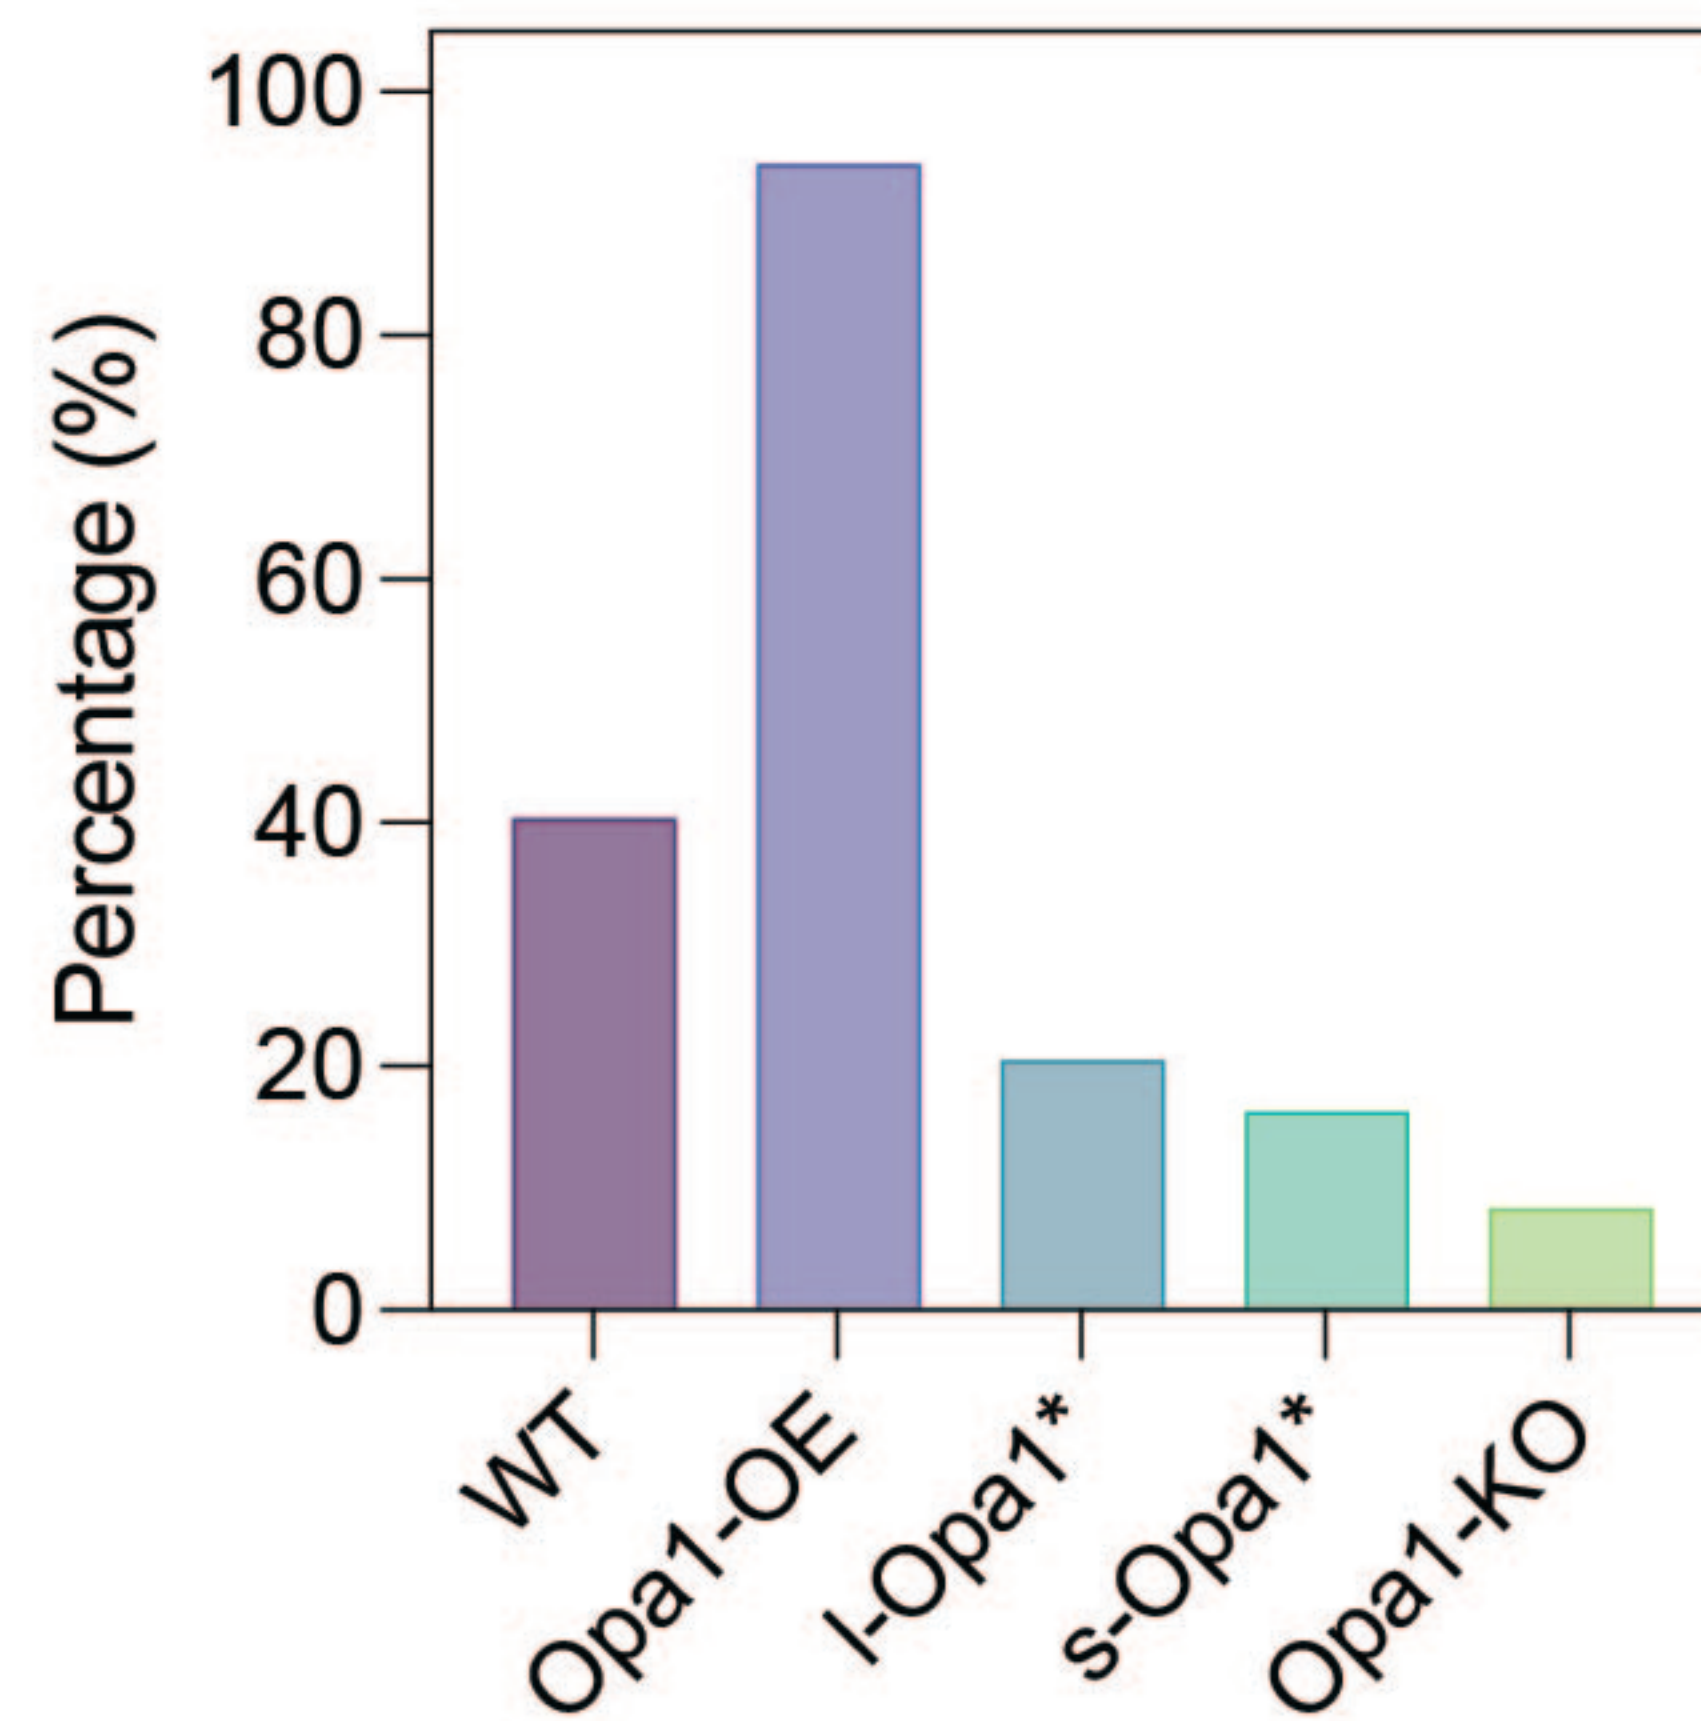

bioRxiv preprint doi: <https://doi.org/10.1101/2023.01.16.524176>; this version posted November 9, 2023. The copyright holder for this preprint (which was not certified by peer review) is the author/funder, who has granted bioRxiv a license to display the preprint in perpetuity. It is made available under aCC-BY-NC-ND 4.0 International license.

**a**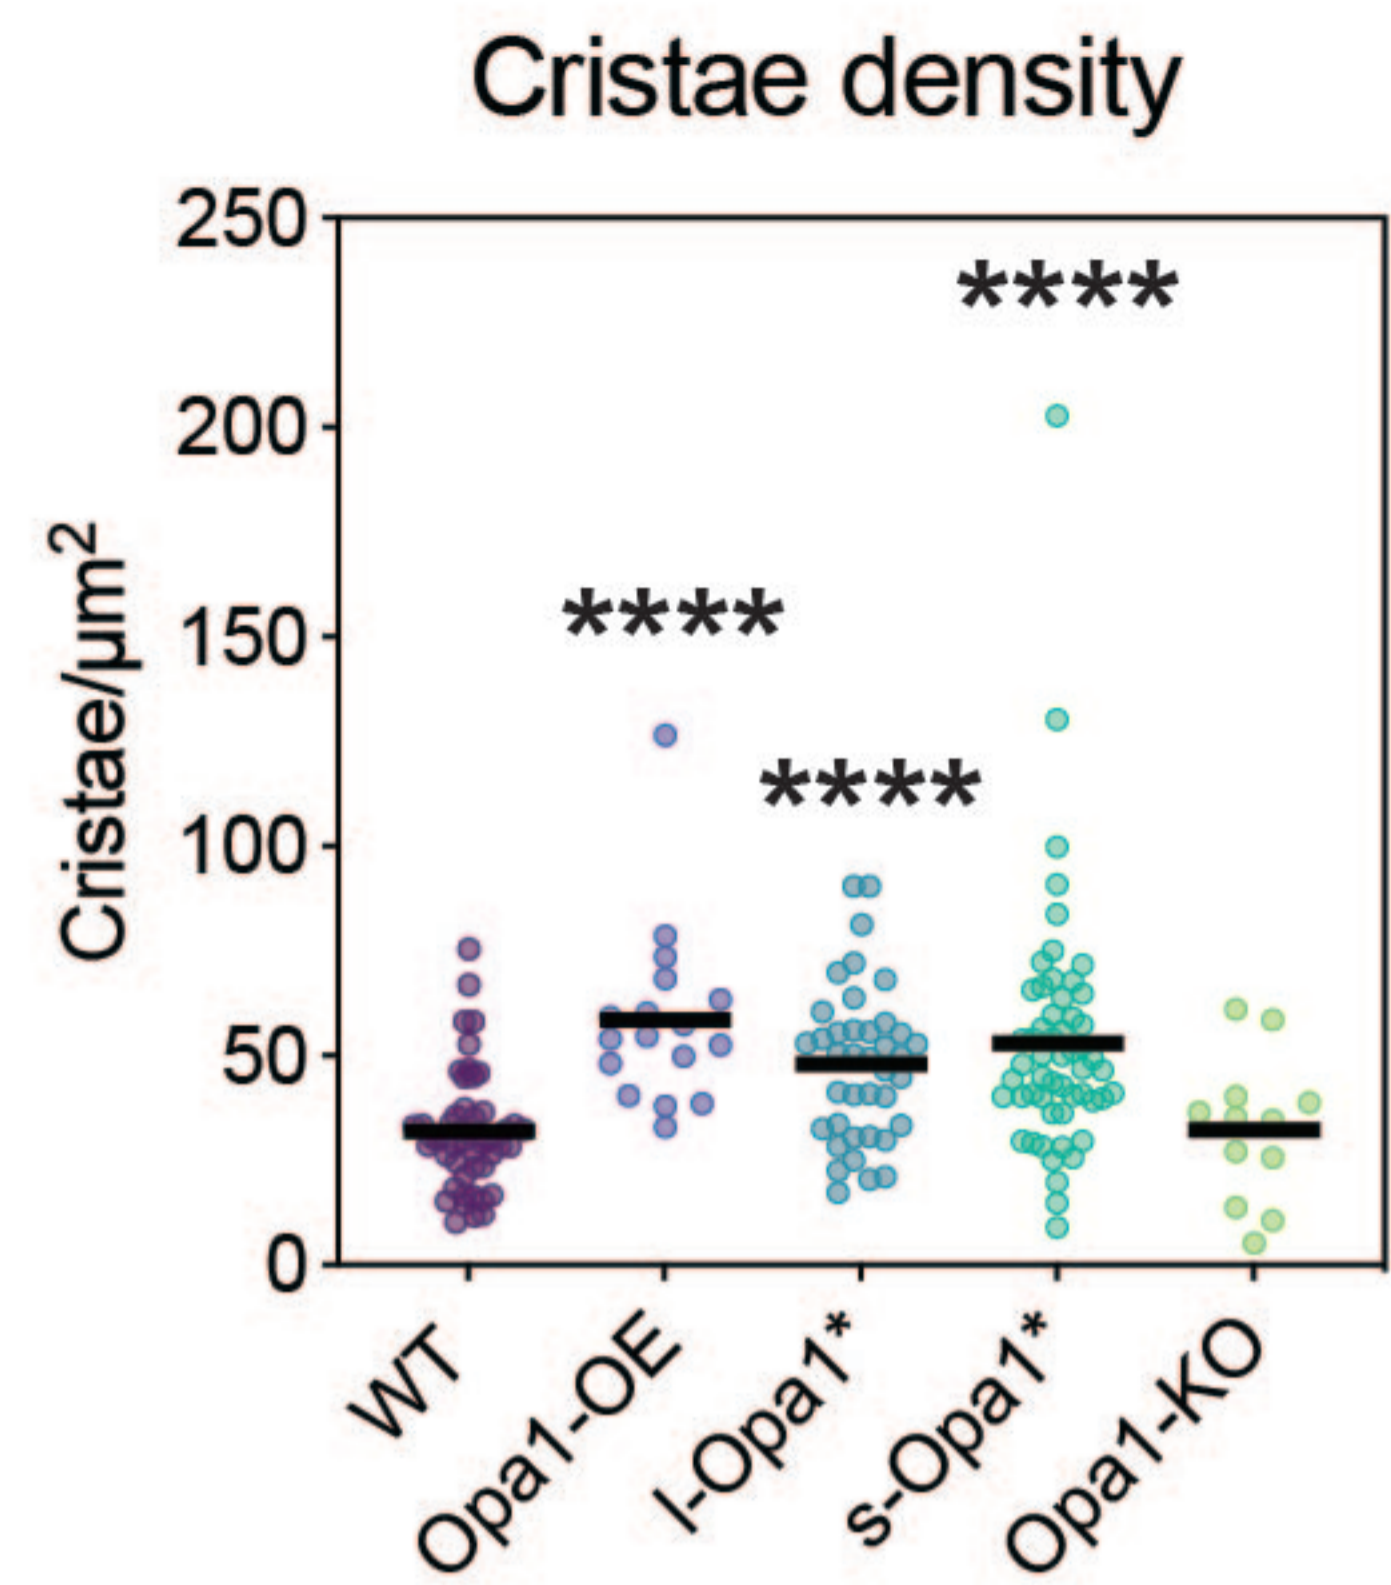**b**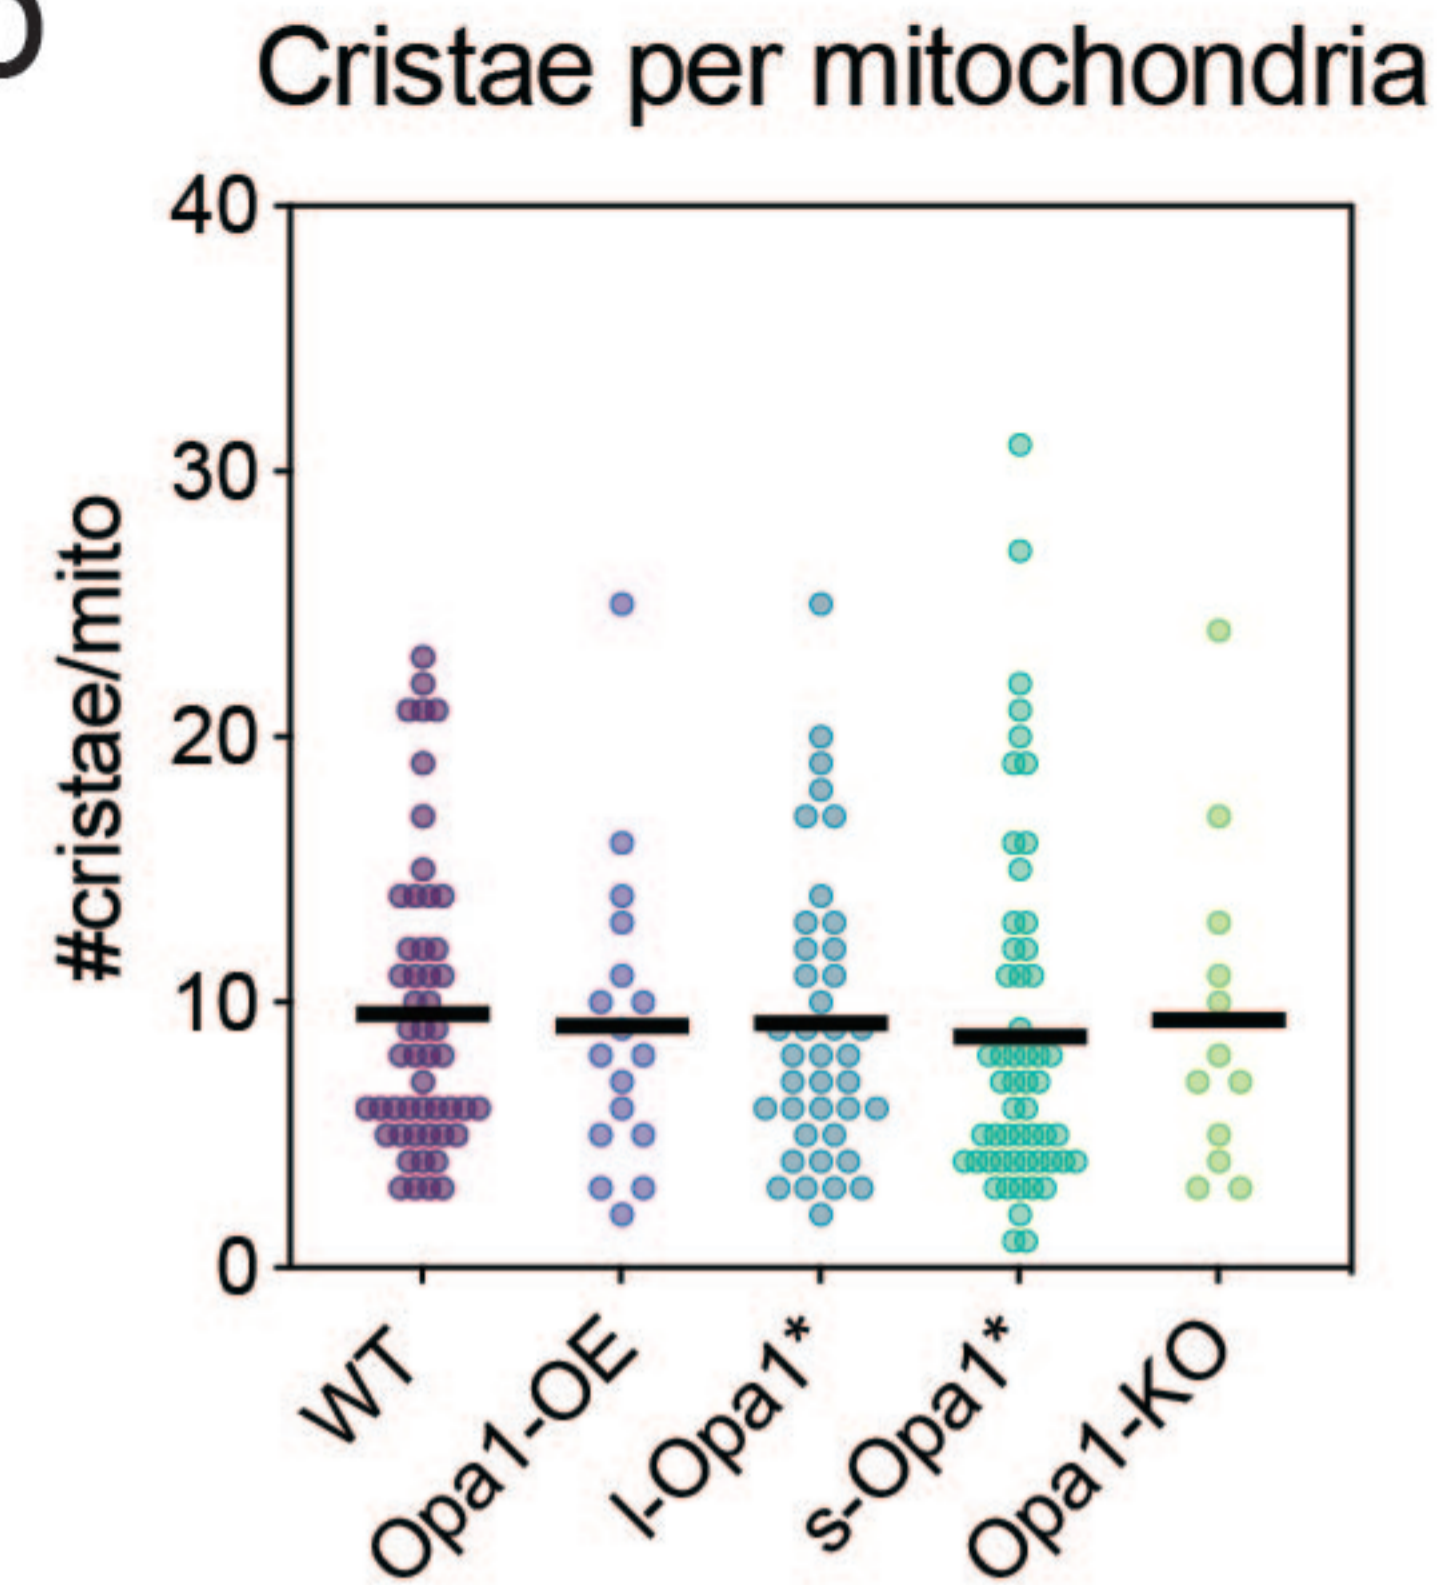

bioRxiv preprint doi: <https://doi.org/10.1101/2023.01.16.524176>; this version posted November 9, 2023. The copyright holder for this preprint (which was not certified by peer review) is the author/funder, who has granted bioRxiv a license to display the preprint in perpetuity. It is made available under aCC-BY-NC-ND 4.0 International license.

**c**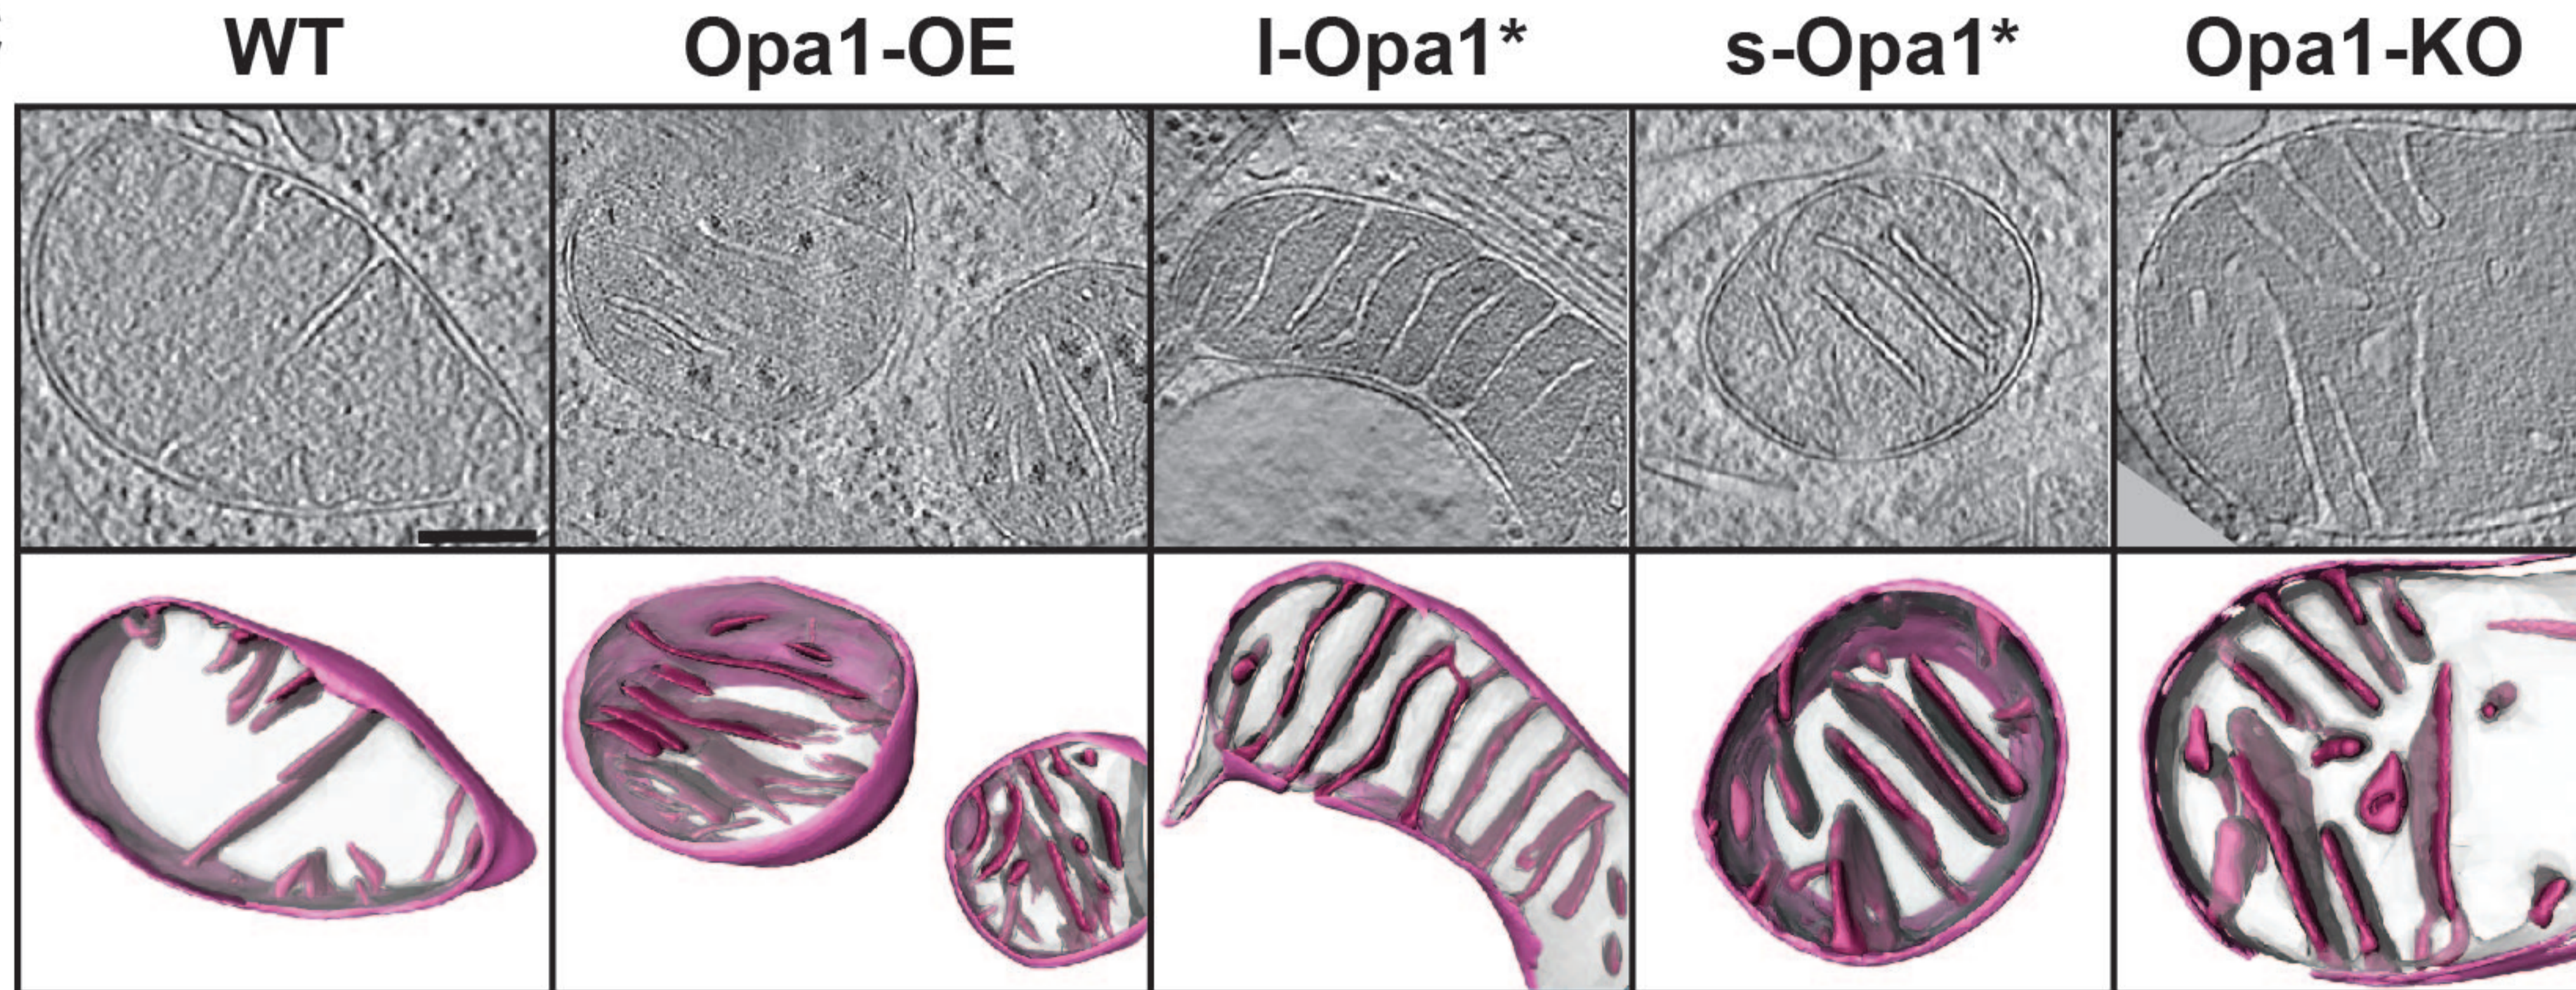**d**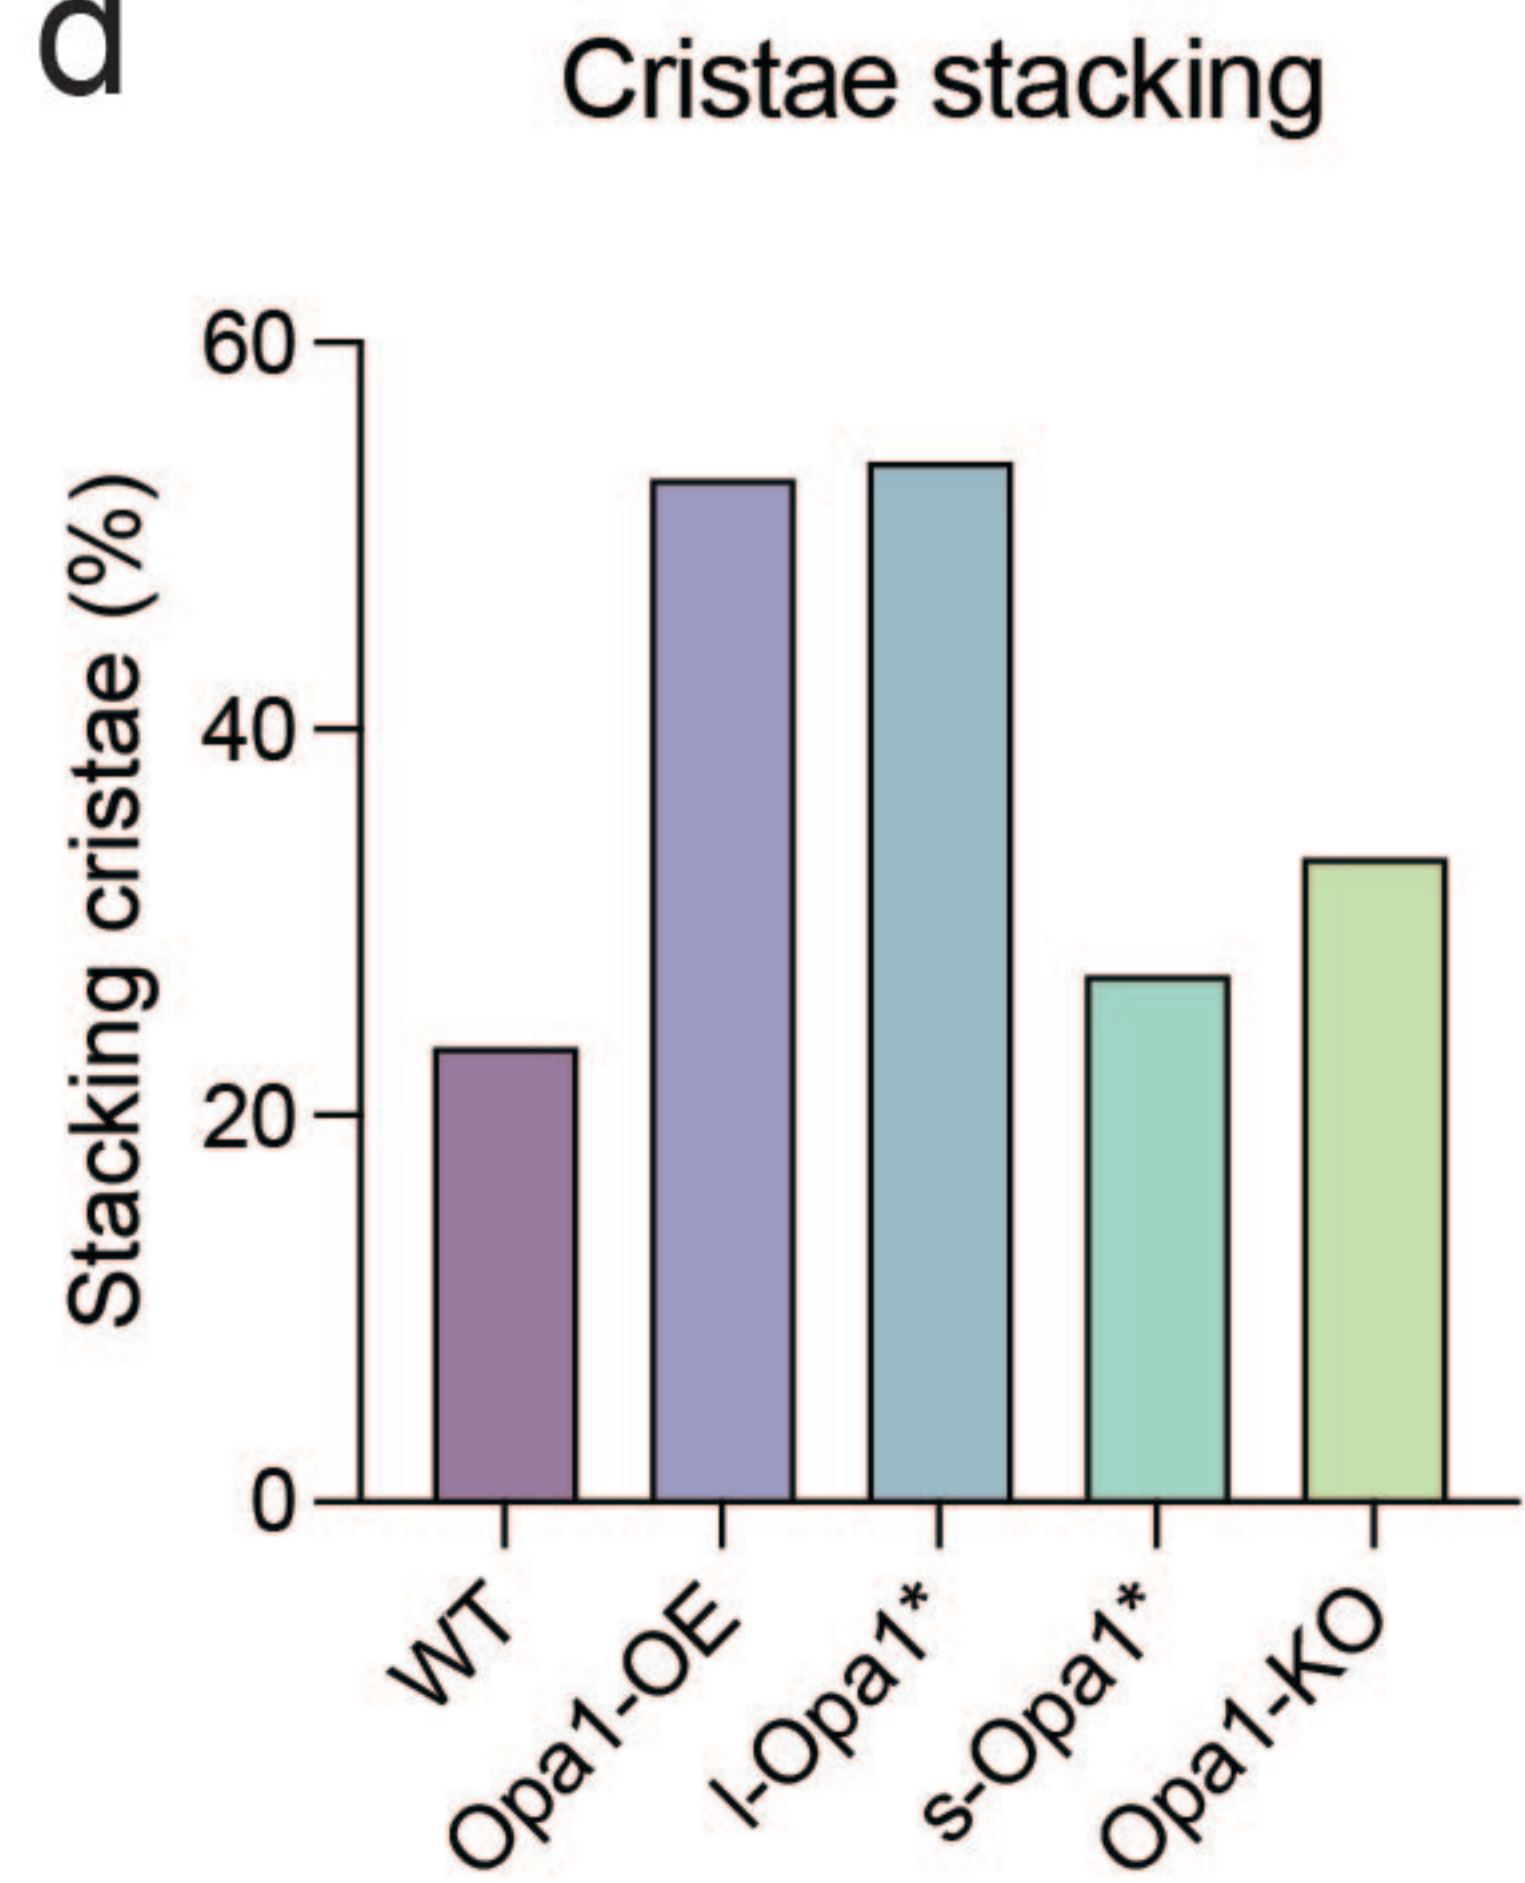



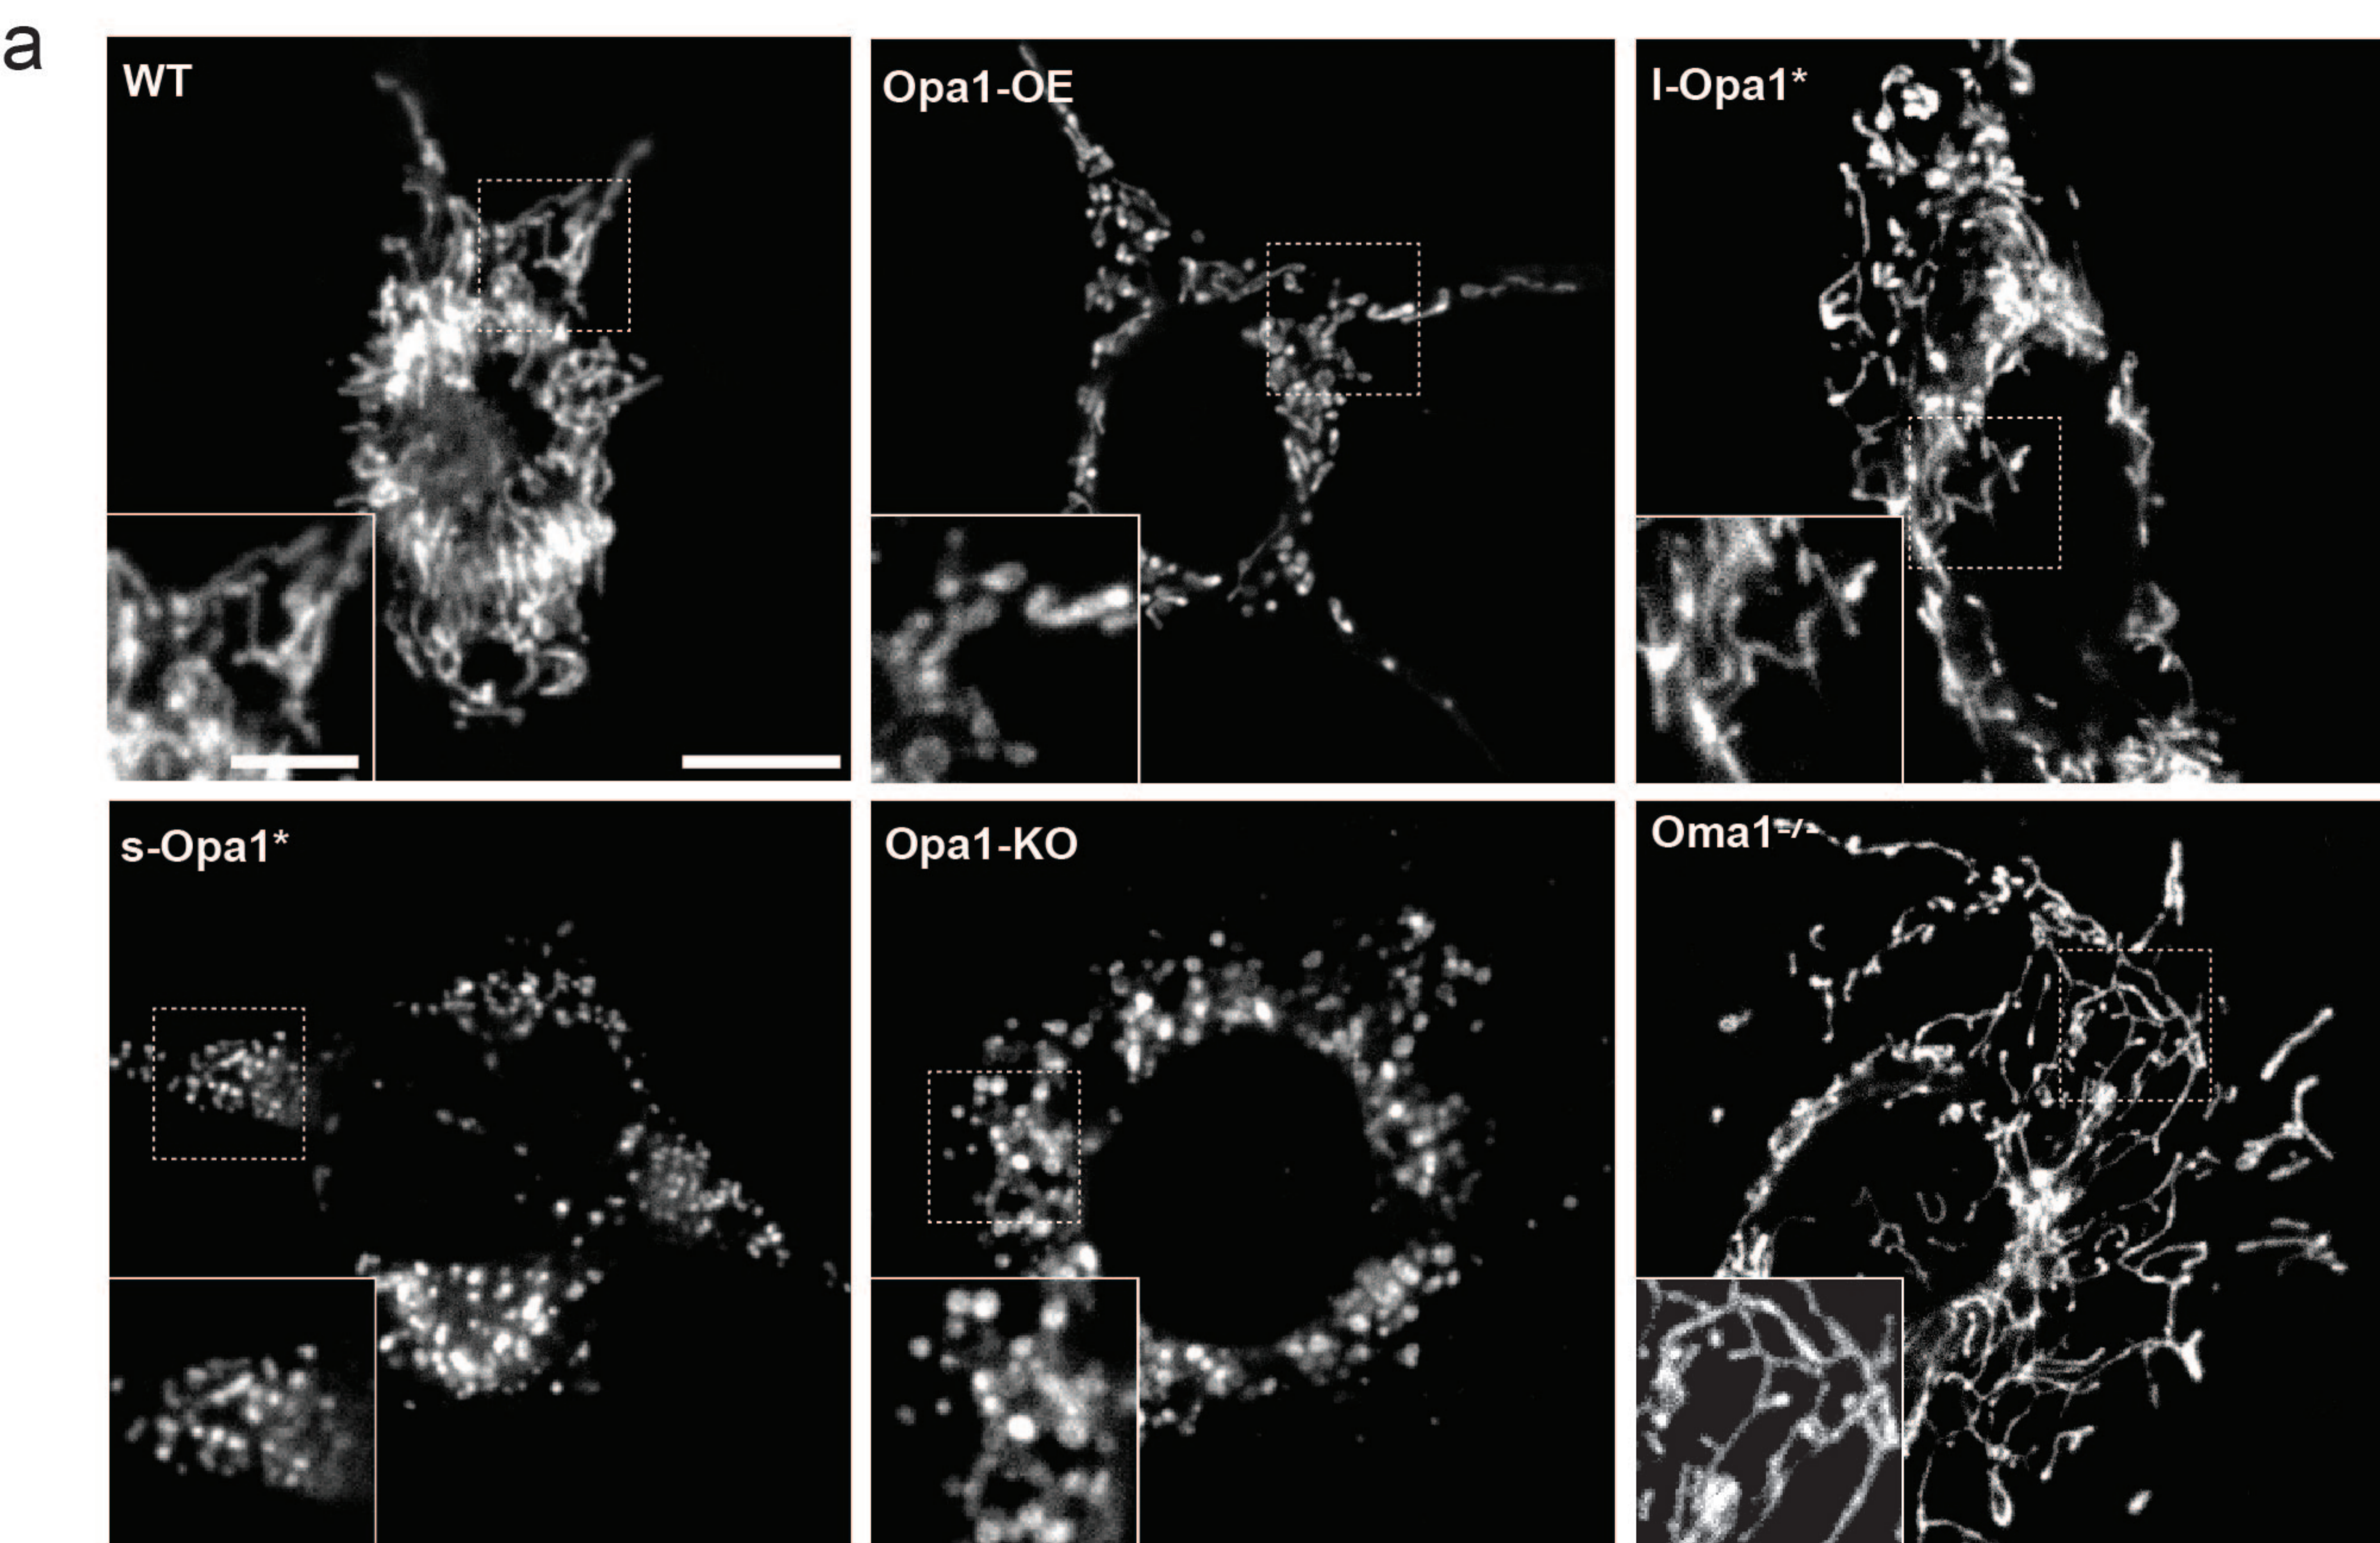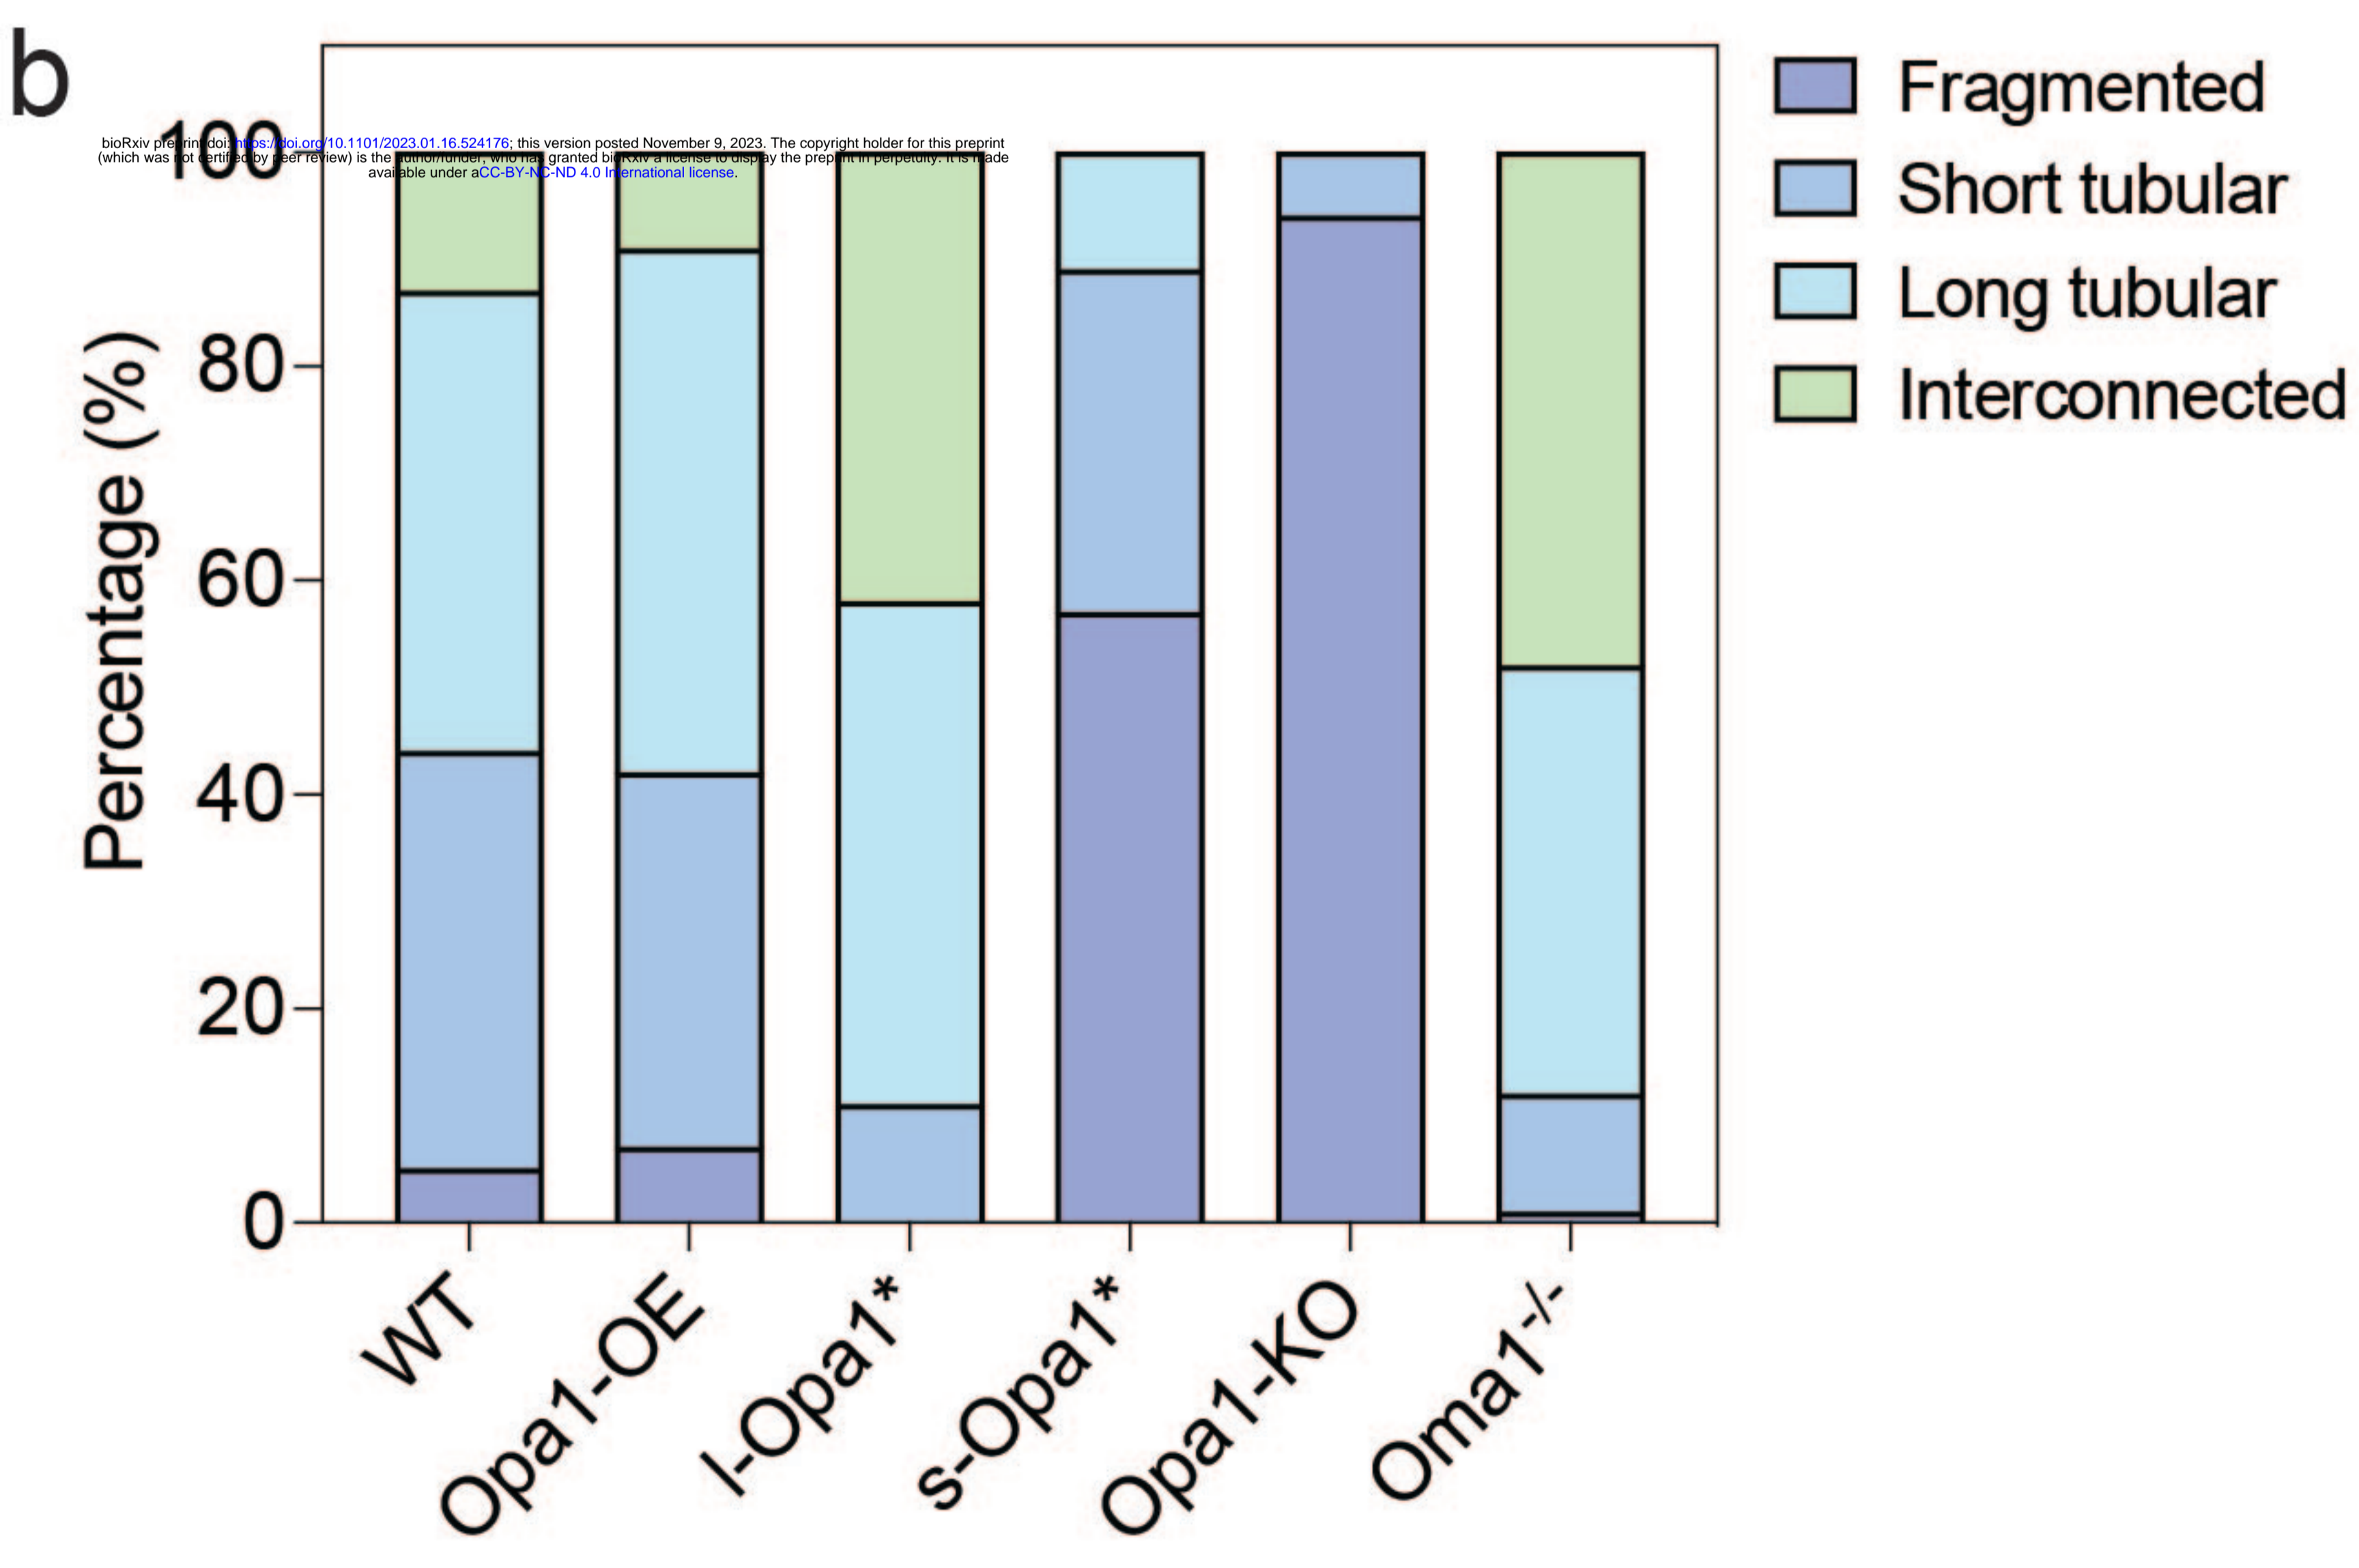

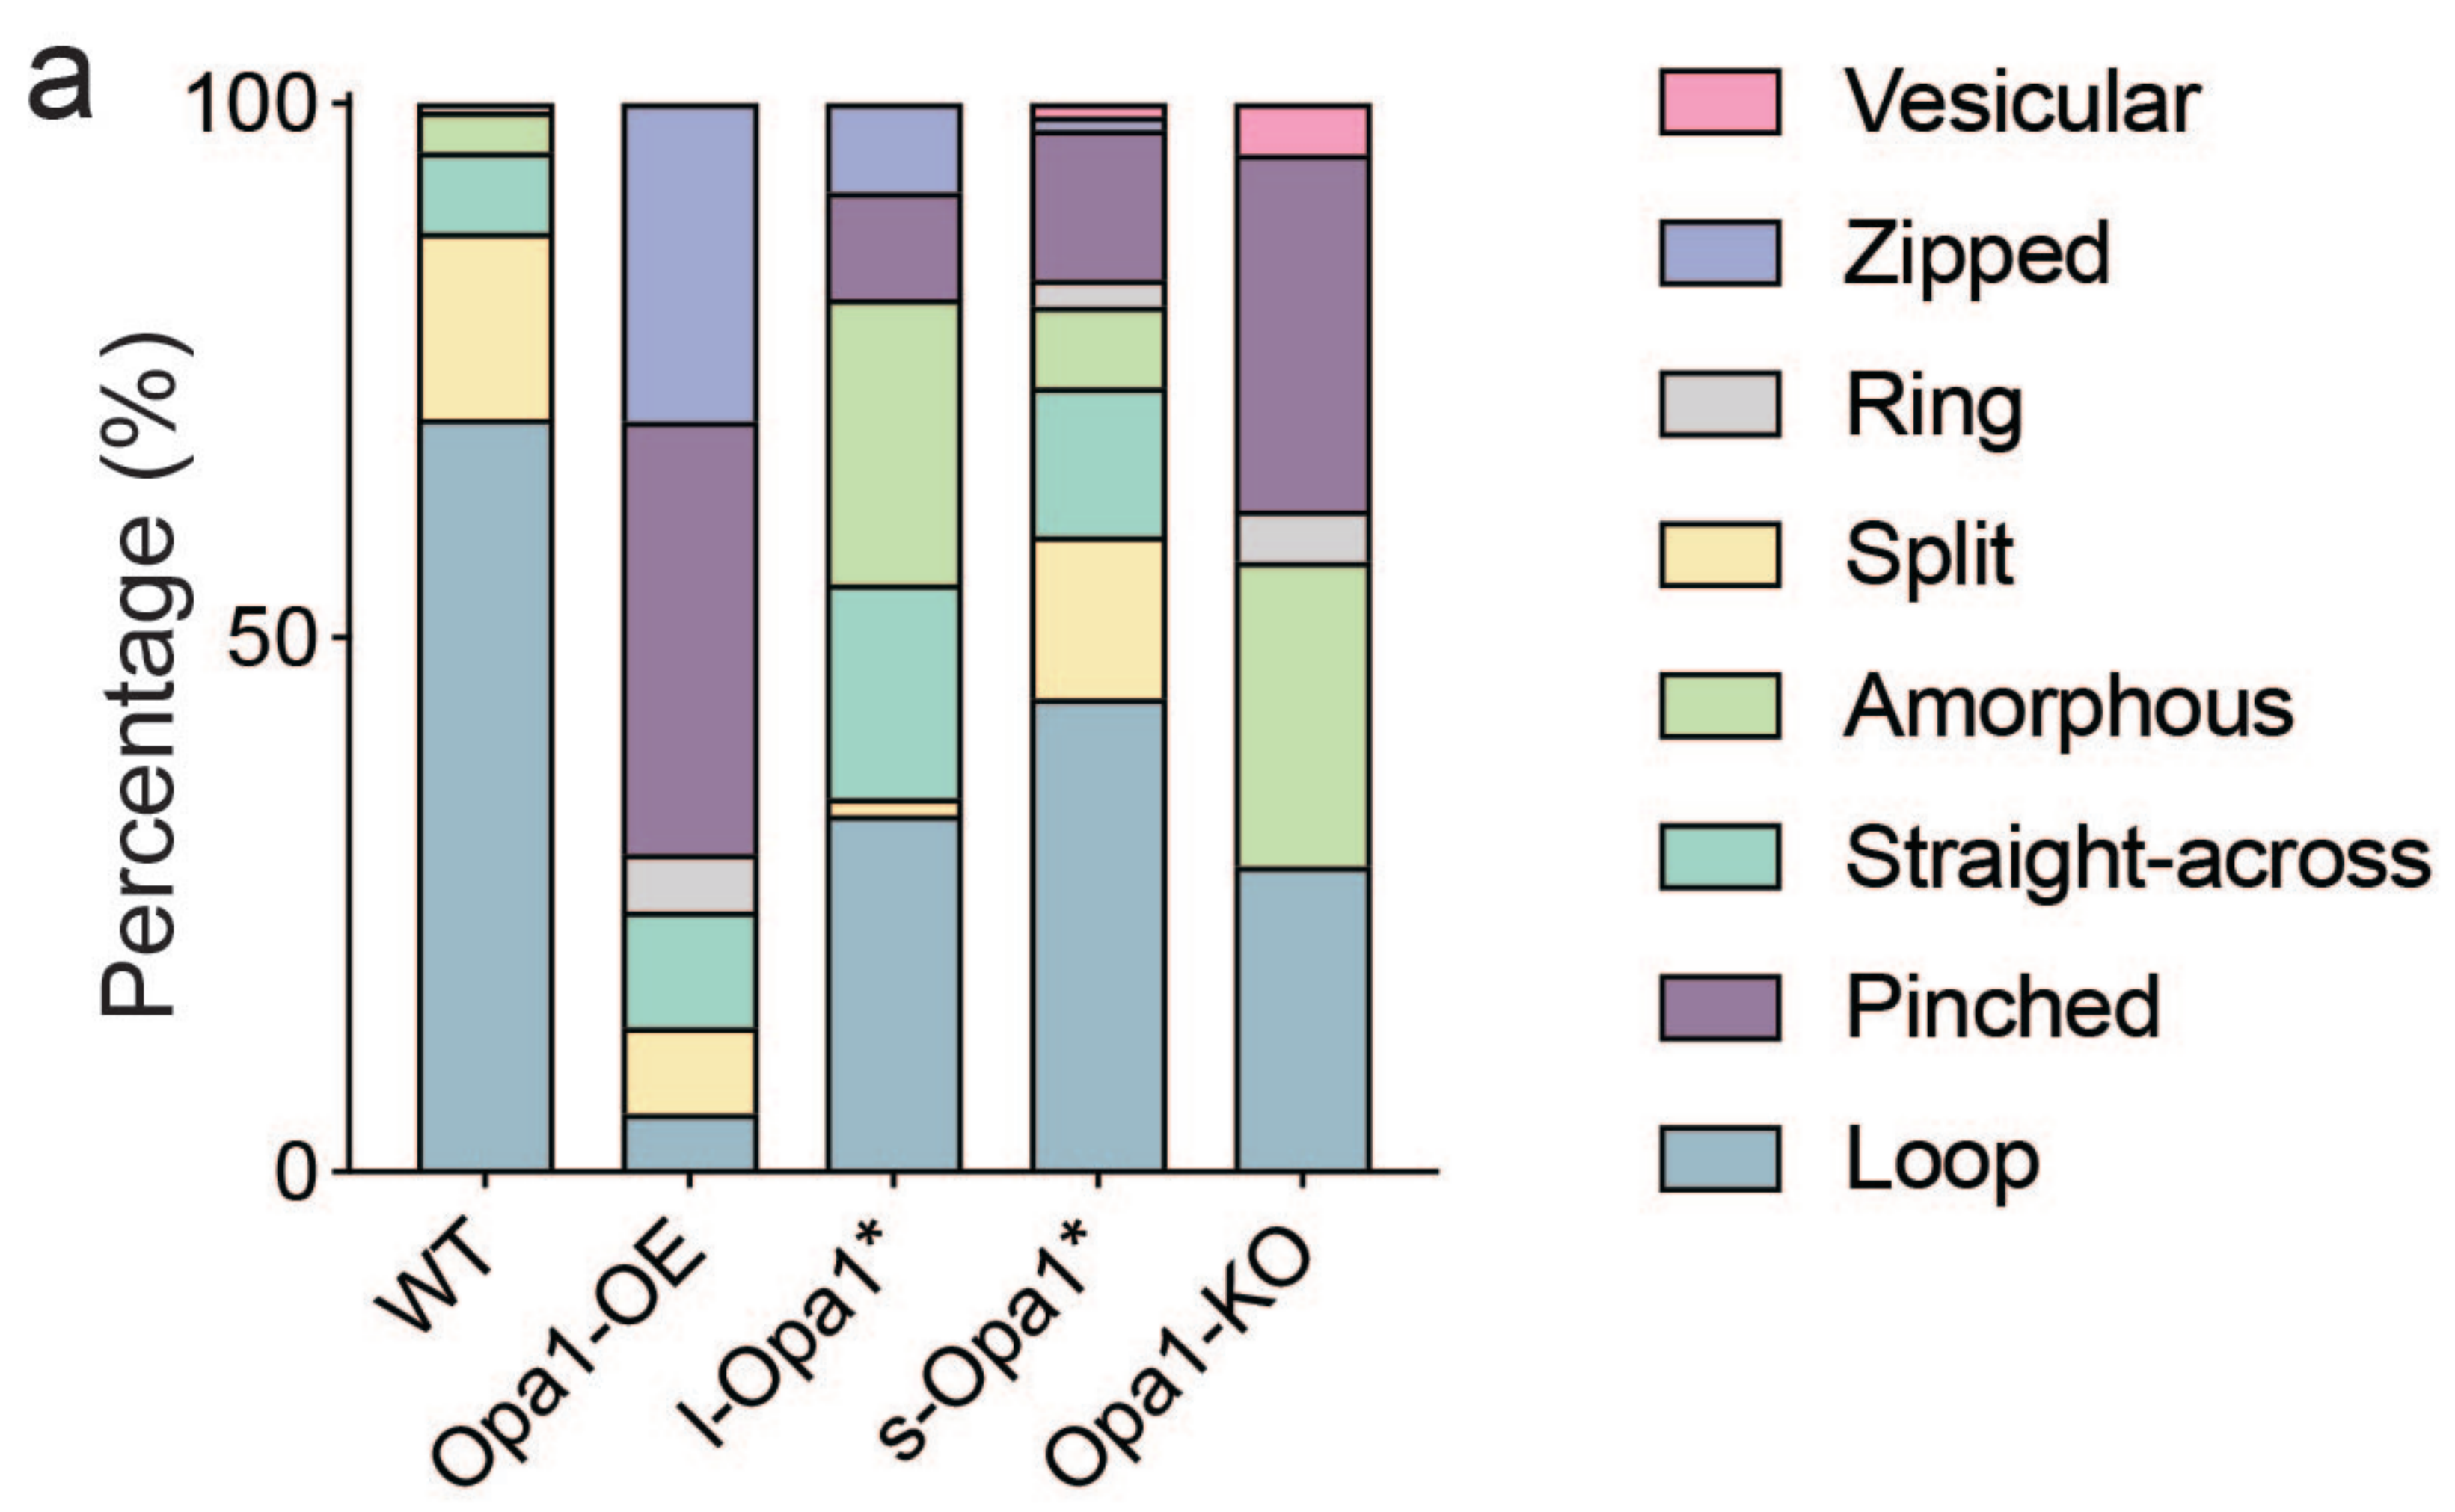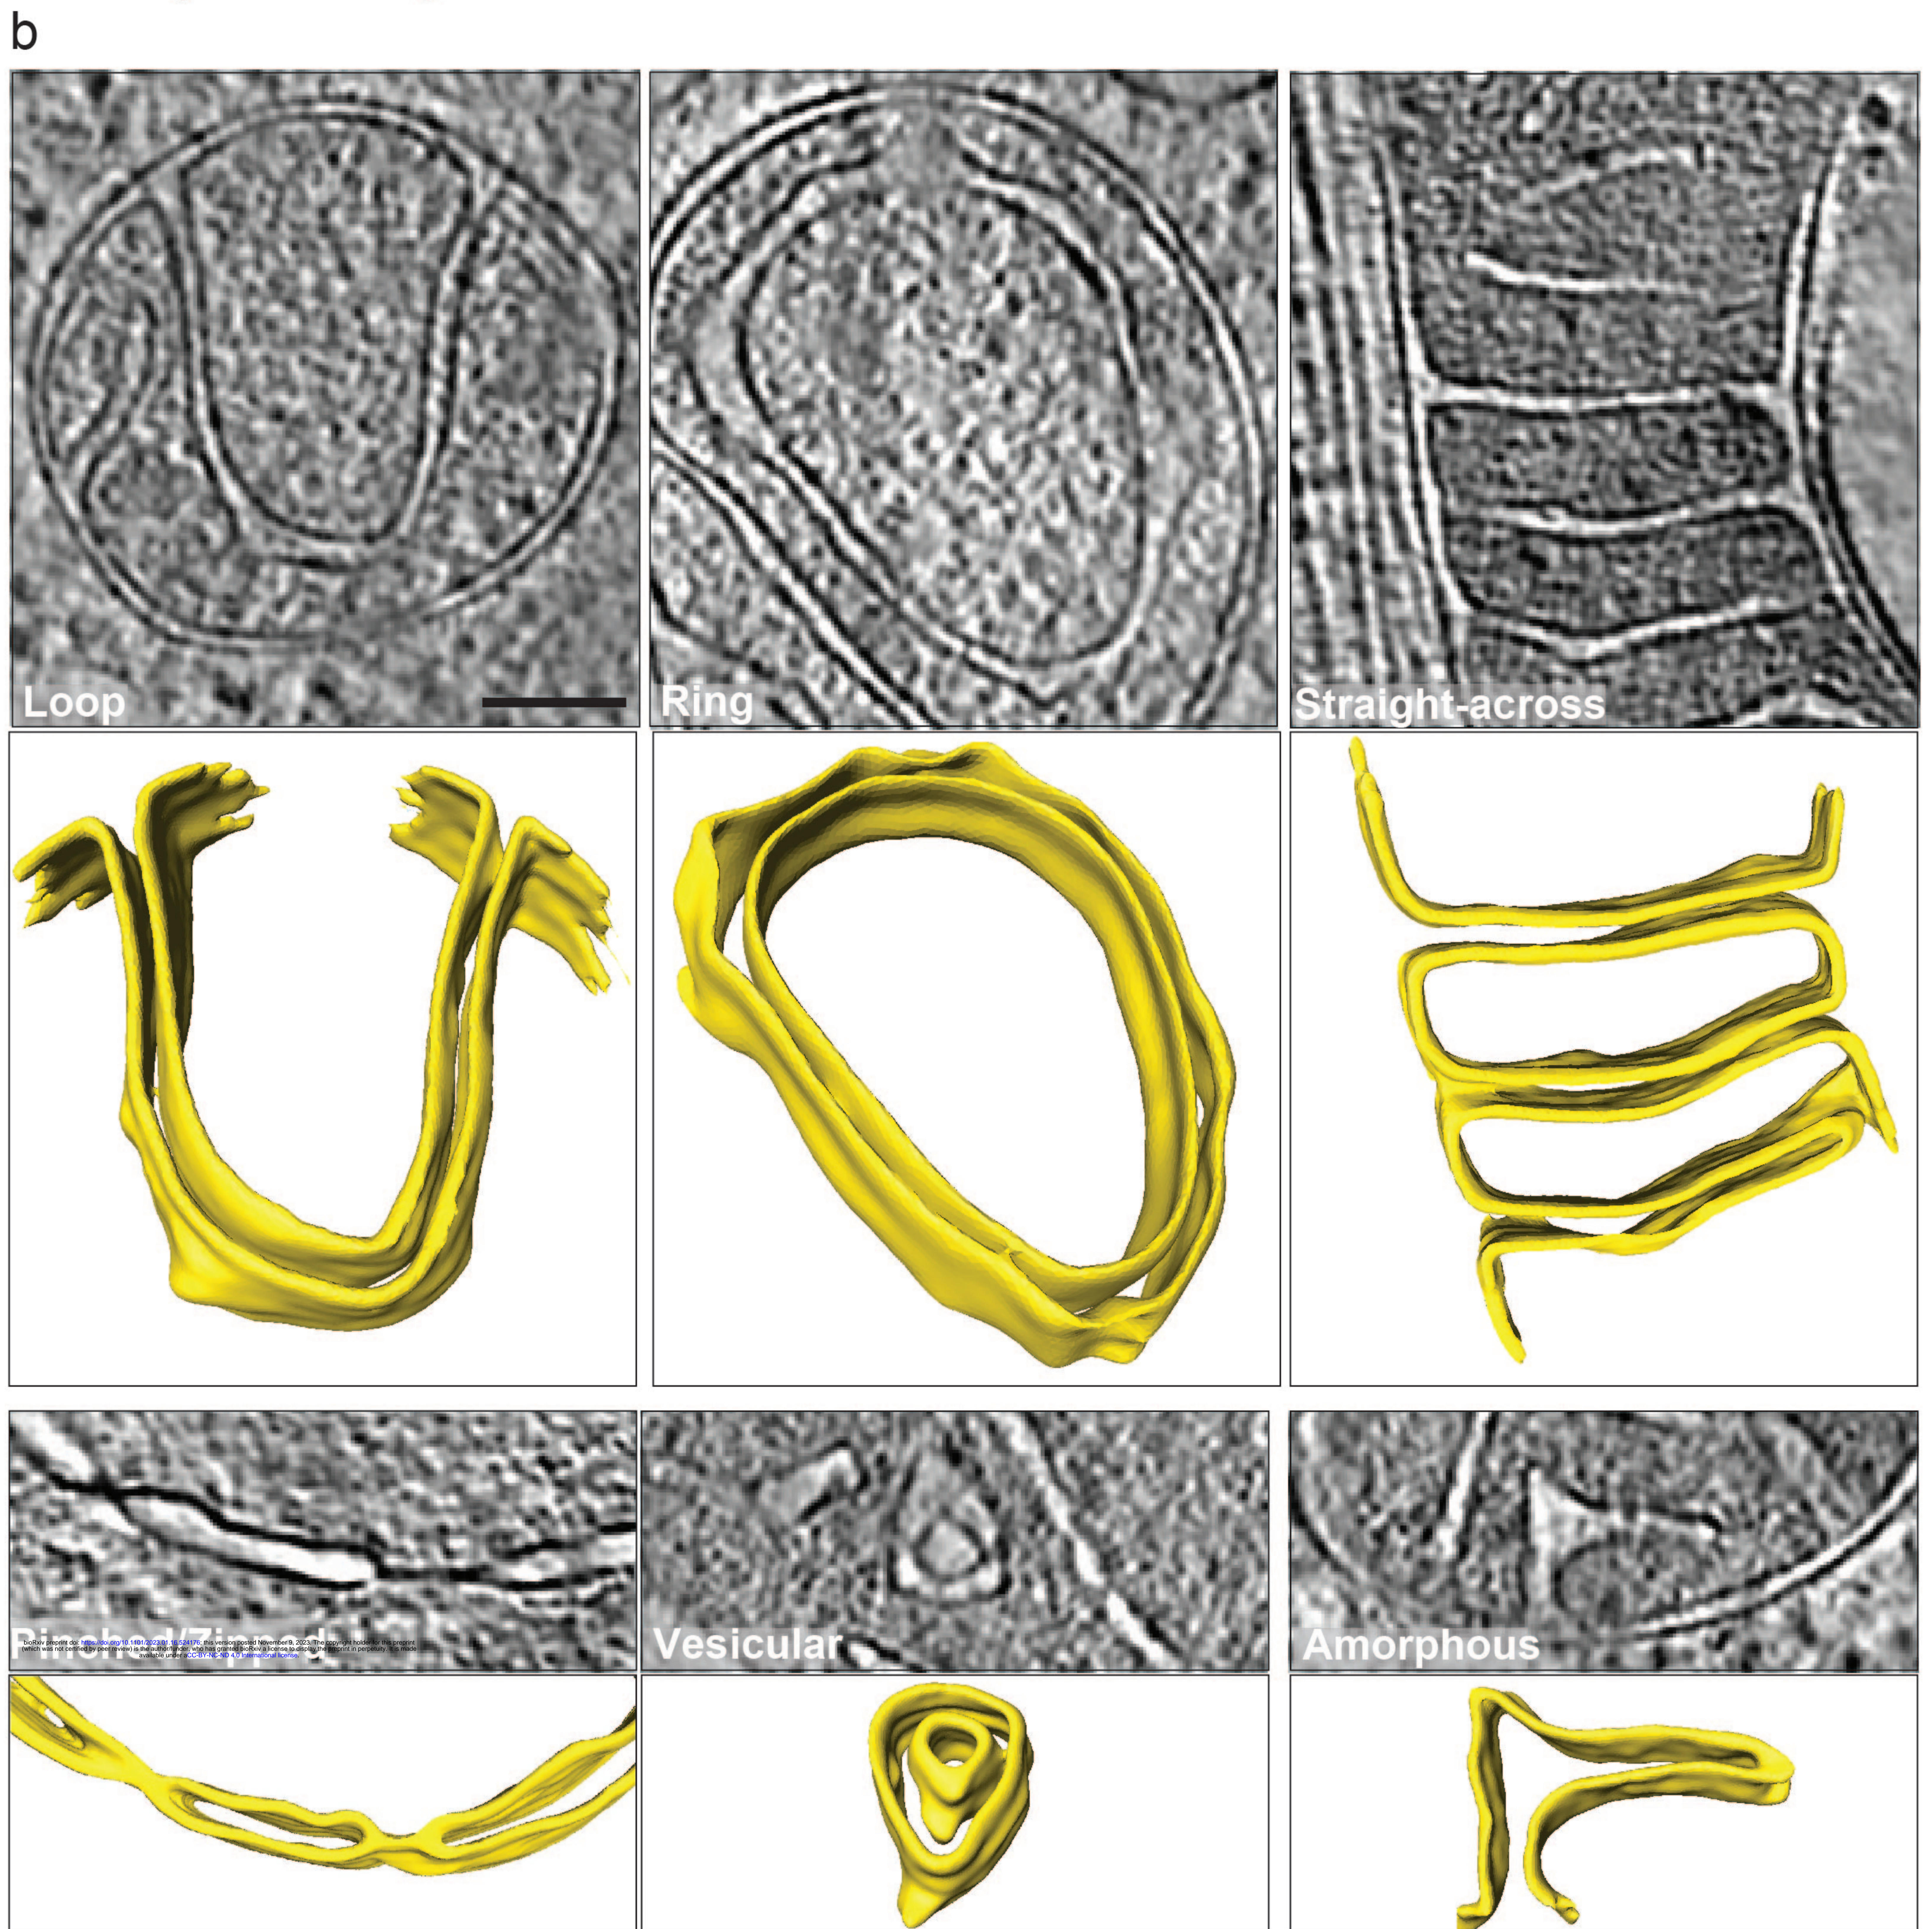

a

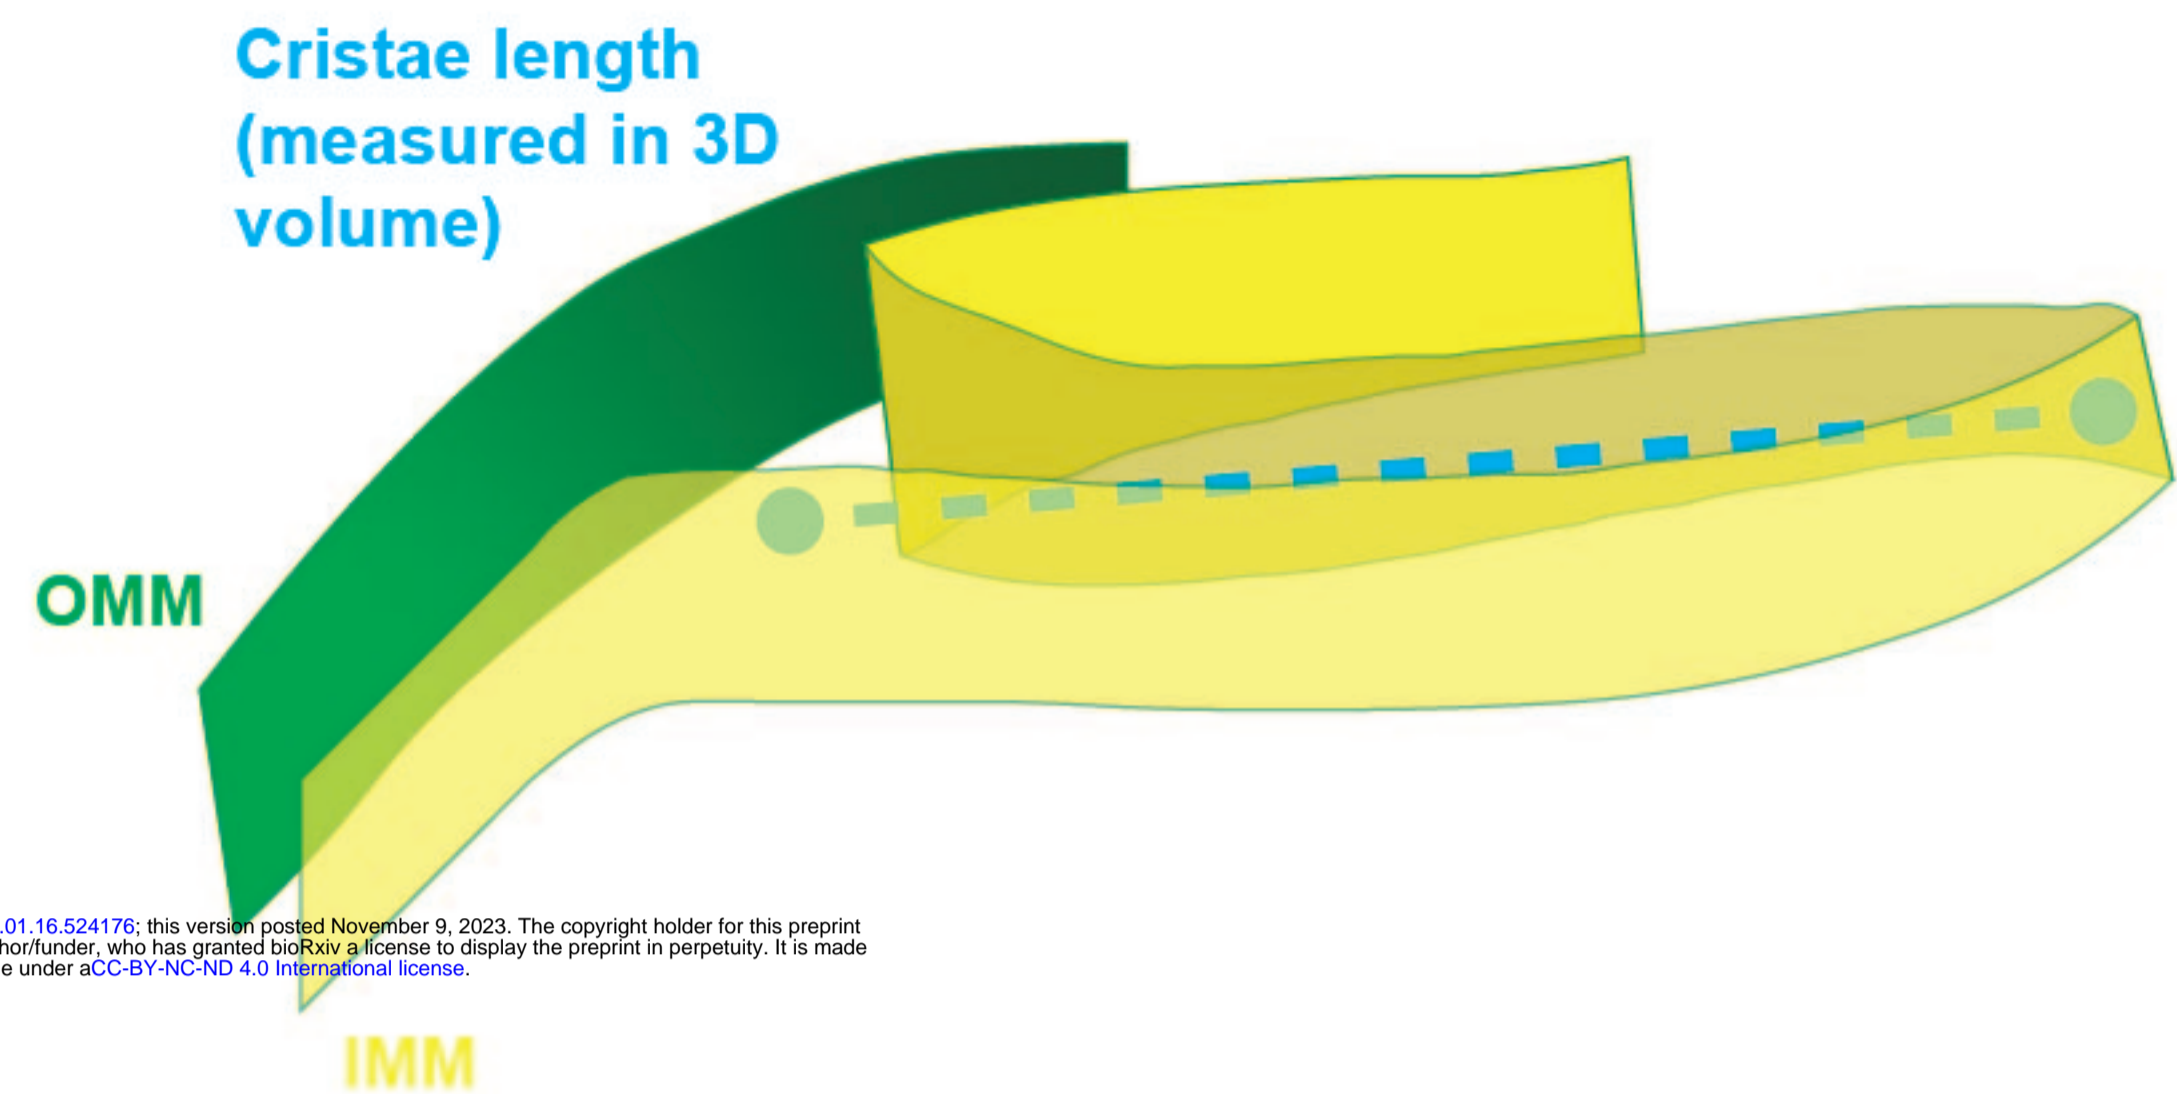

bioRxiv preprint doi: <https://doi.org/10.1101/2023.01.16.524176>; this version posted November 9, 2023. The copyright holder for this preprint (which was not certified by peer review) is the author/funder, who has granted bioRxiv a license to display the preprint in perpetuity. It is made available under aCC-BY-NC-ND 4.0 International license.

b

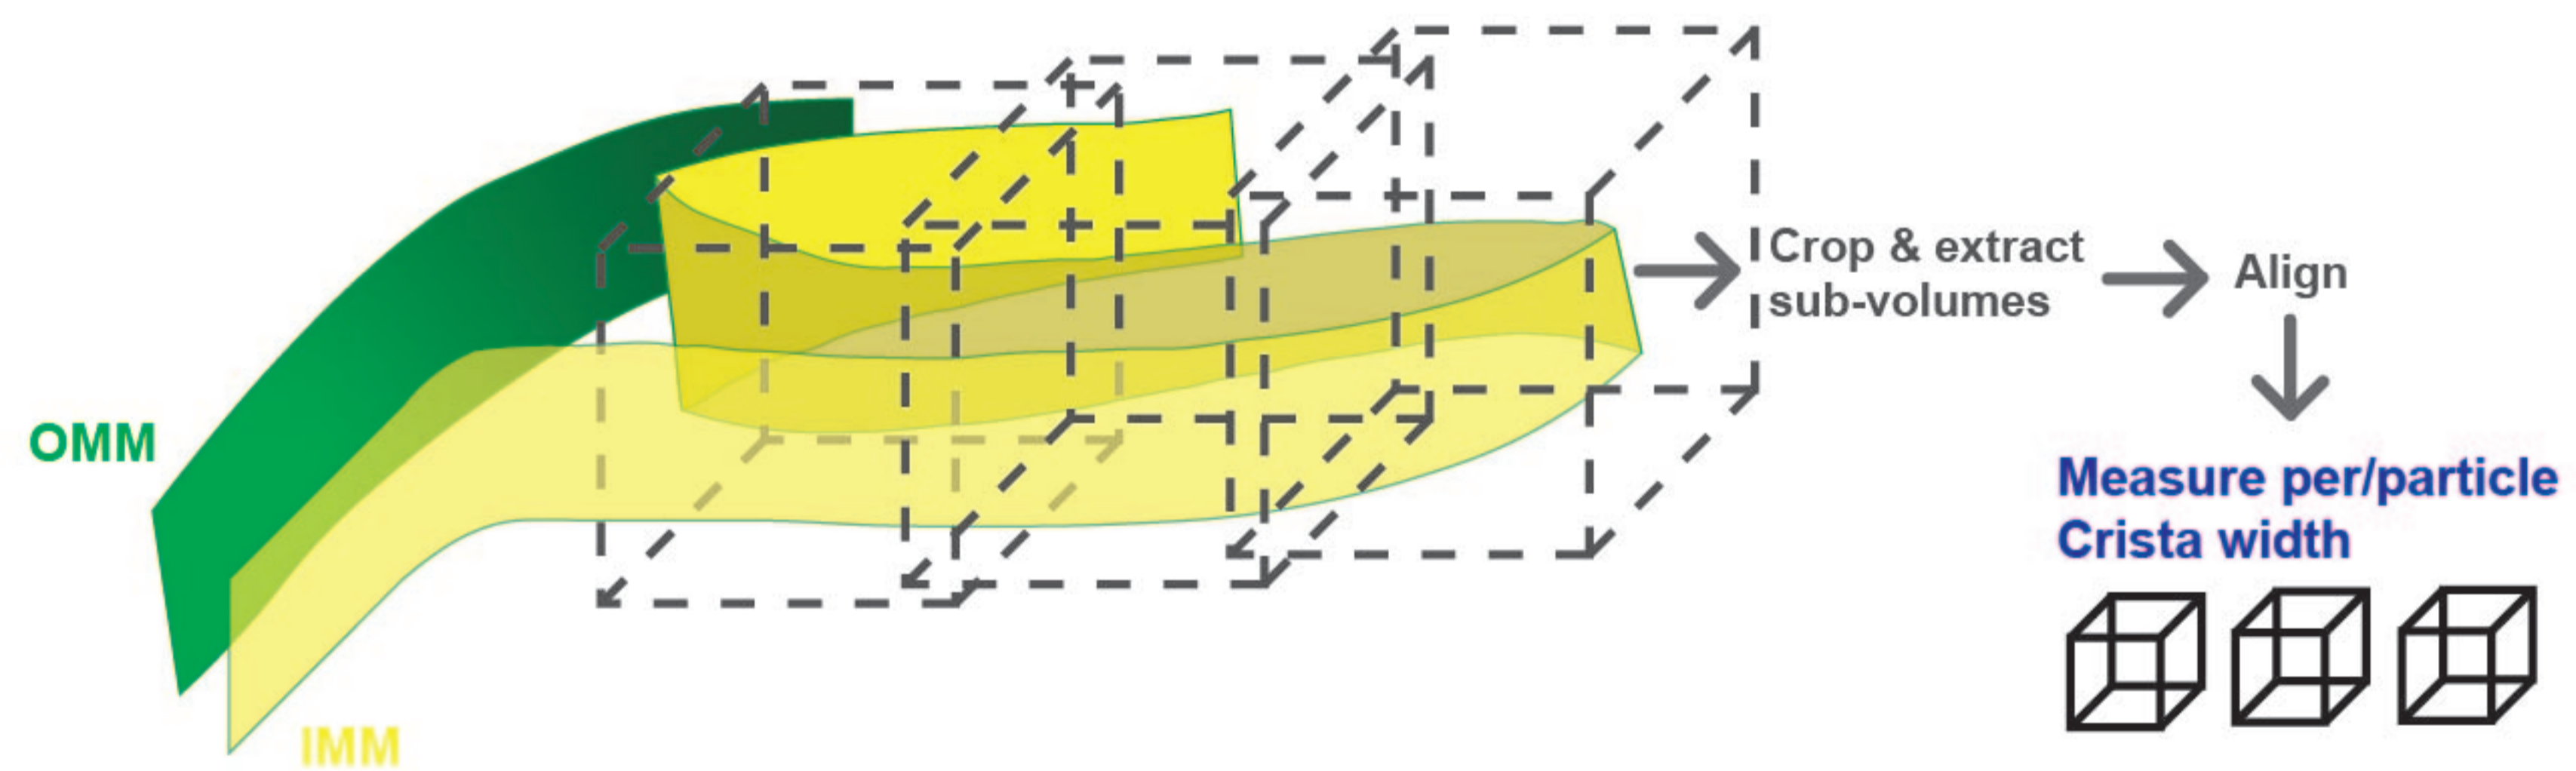

c

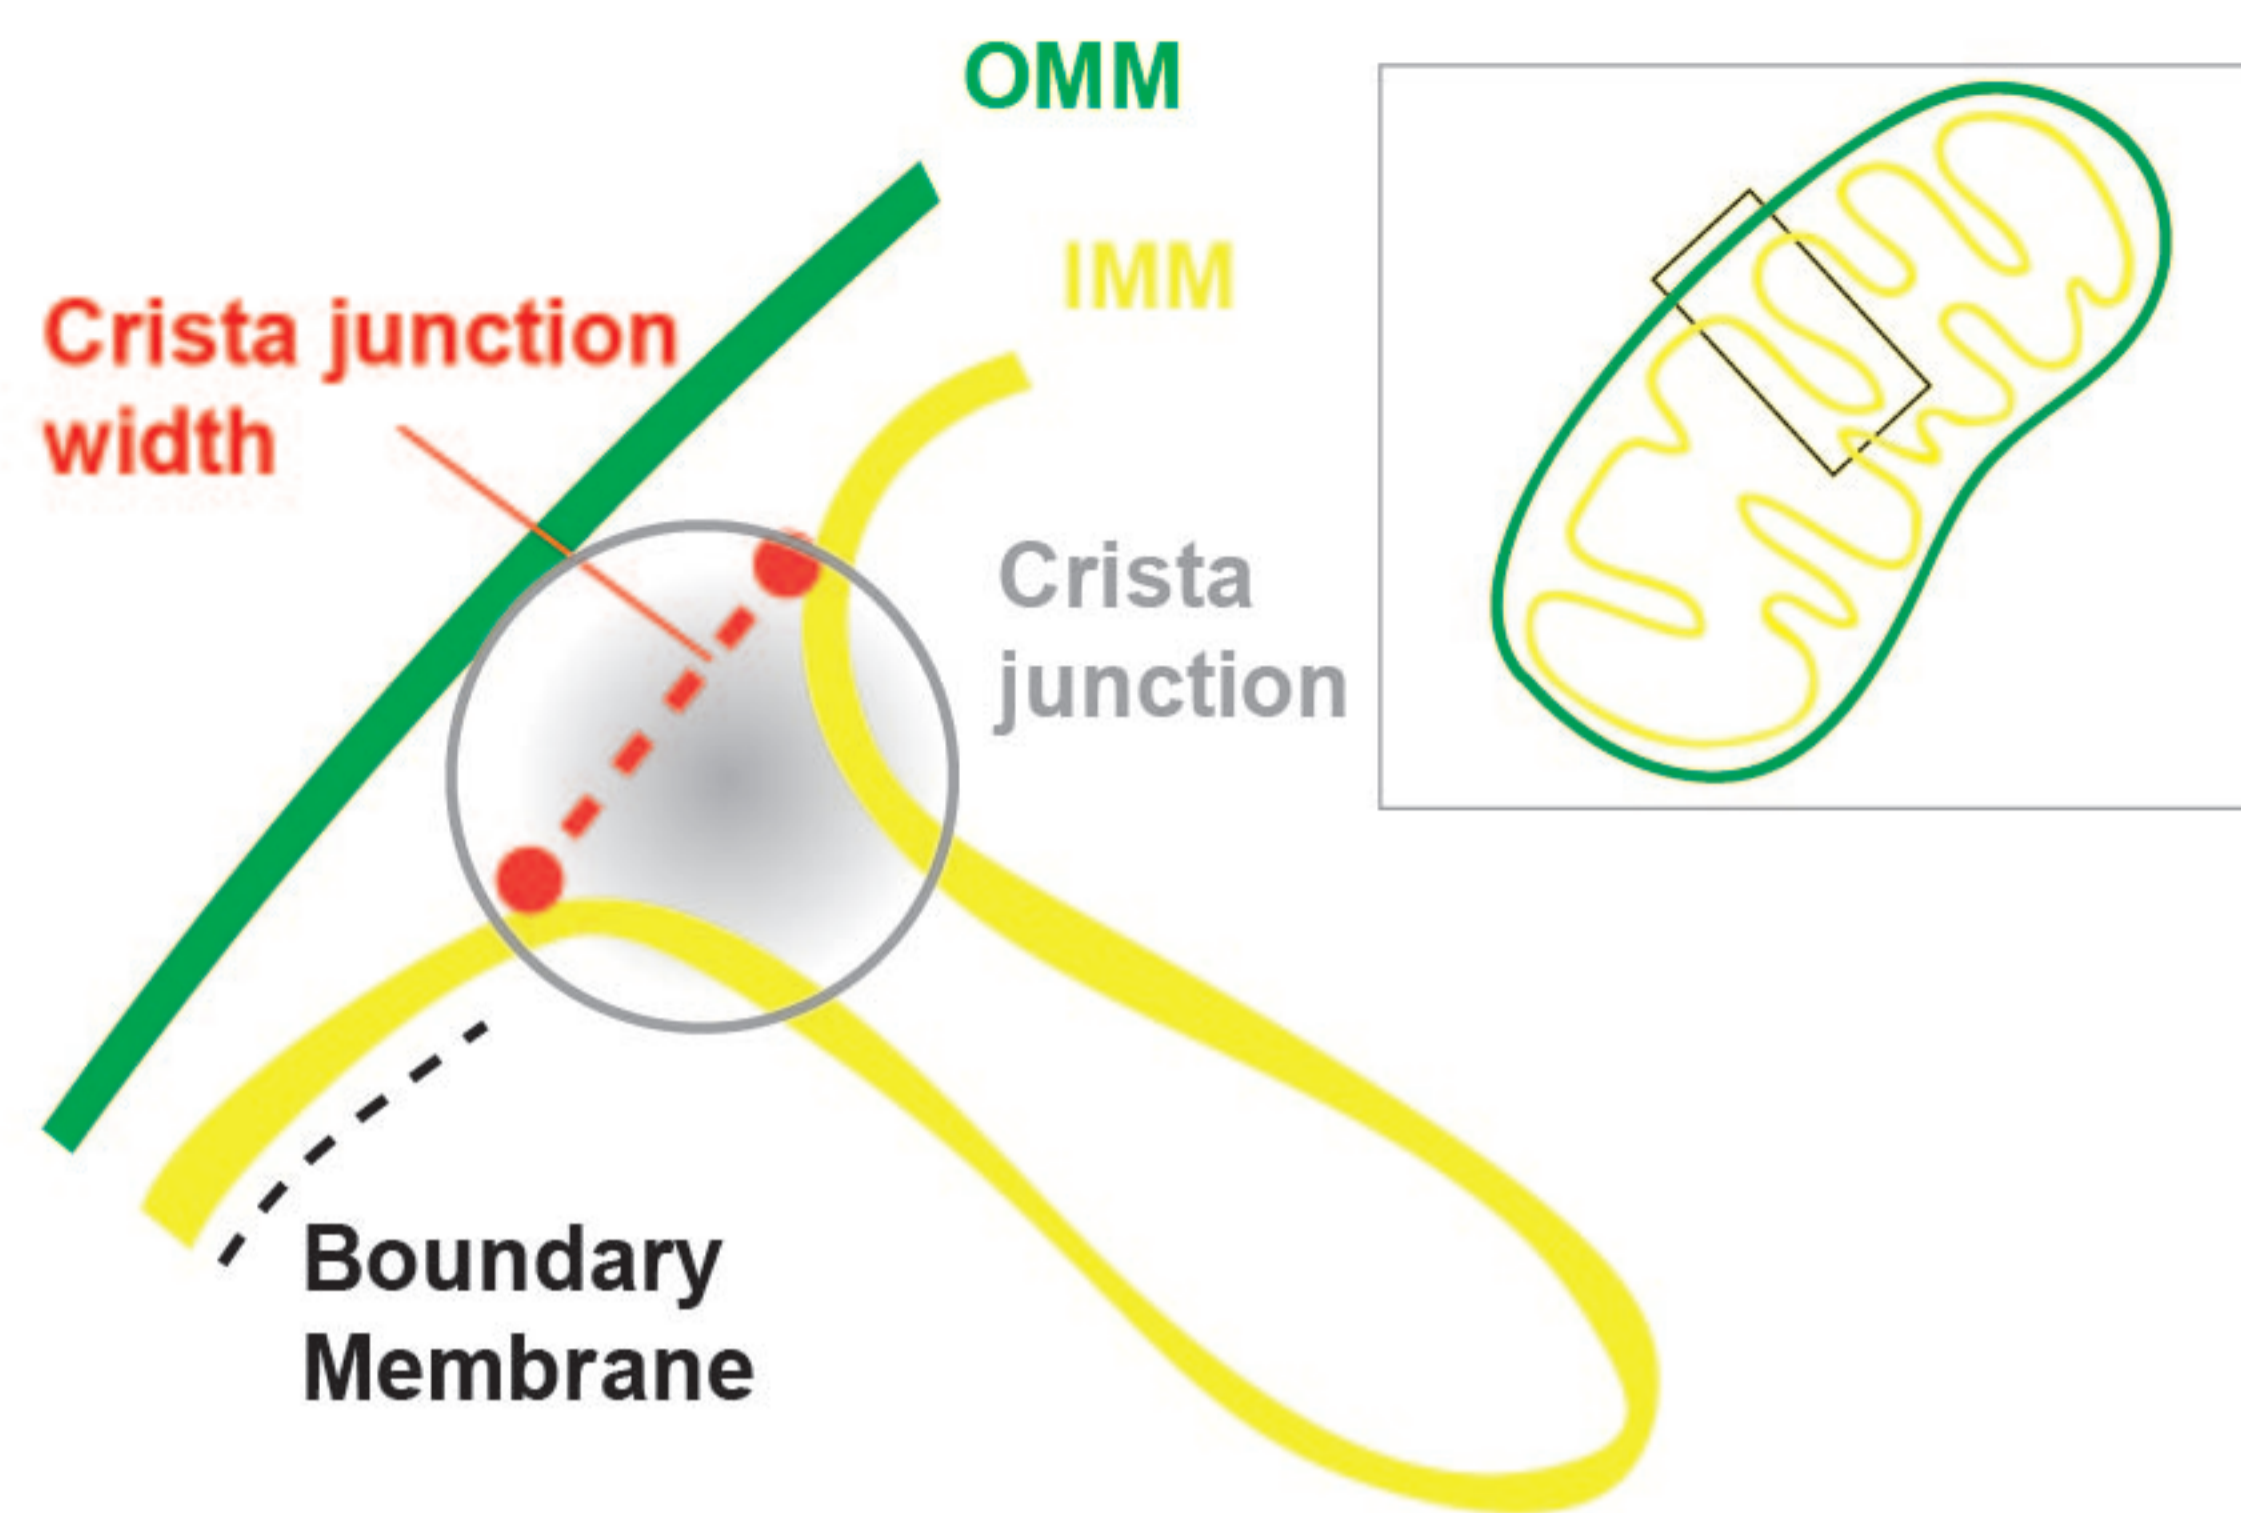

d

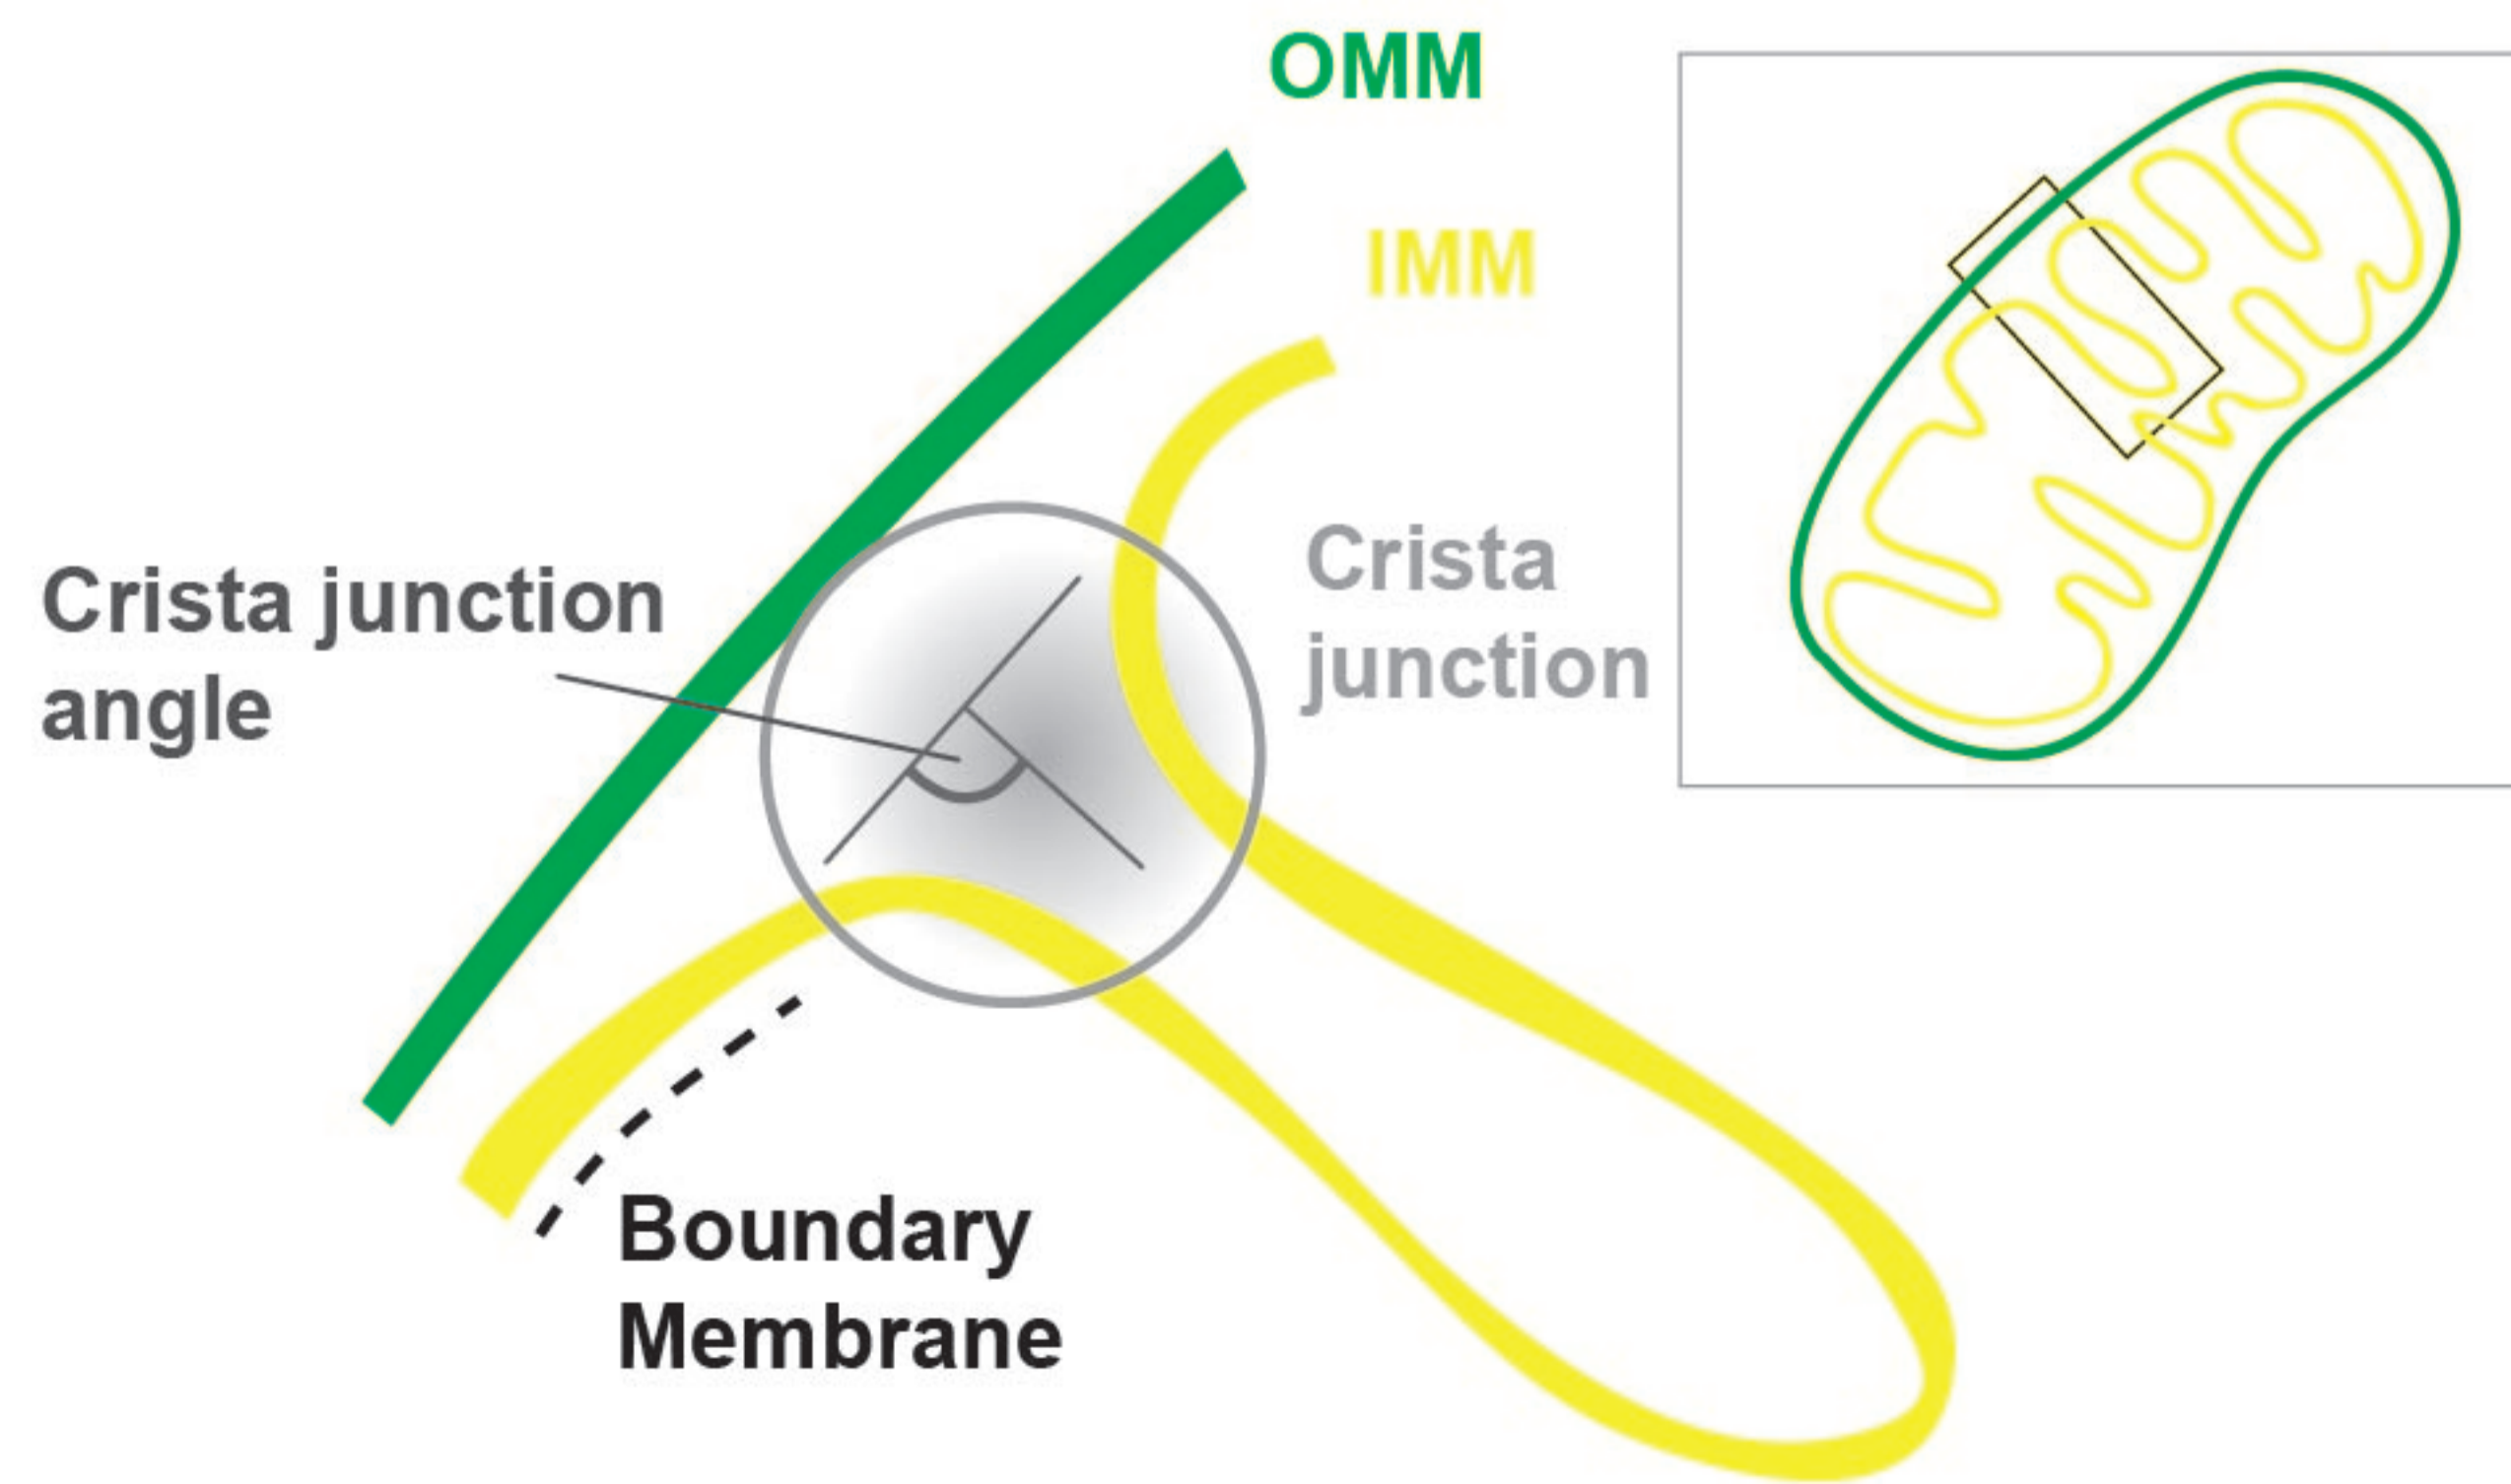

a

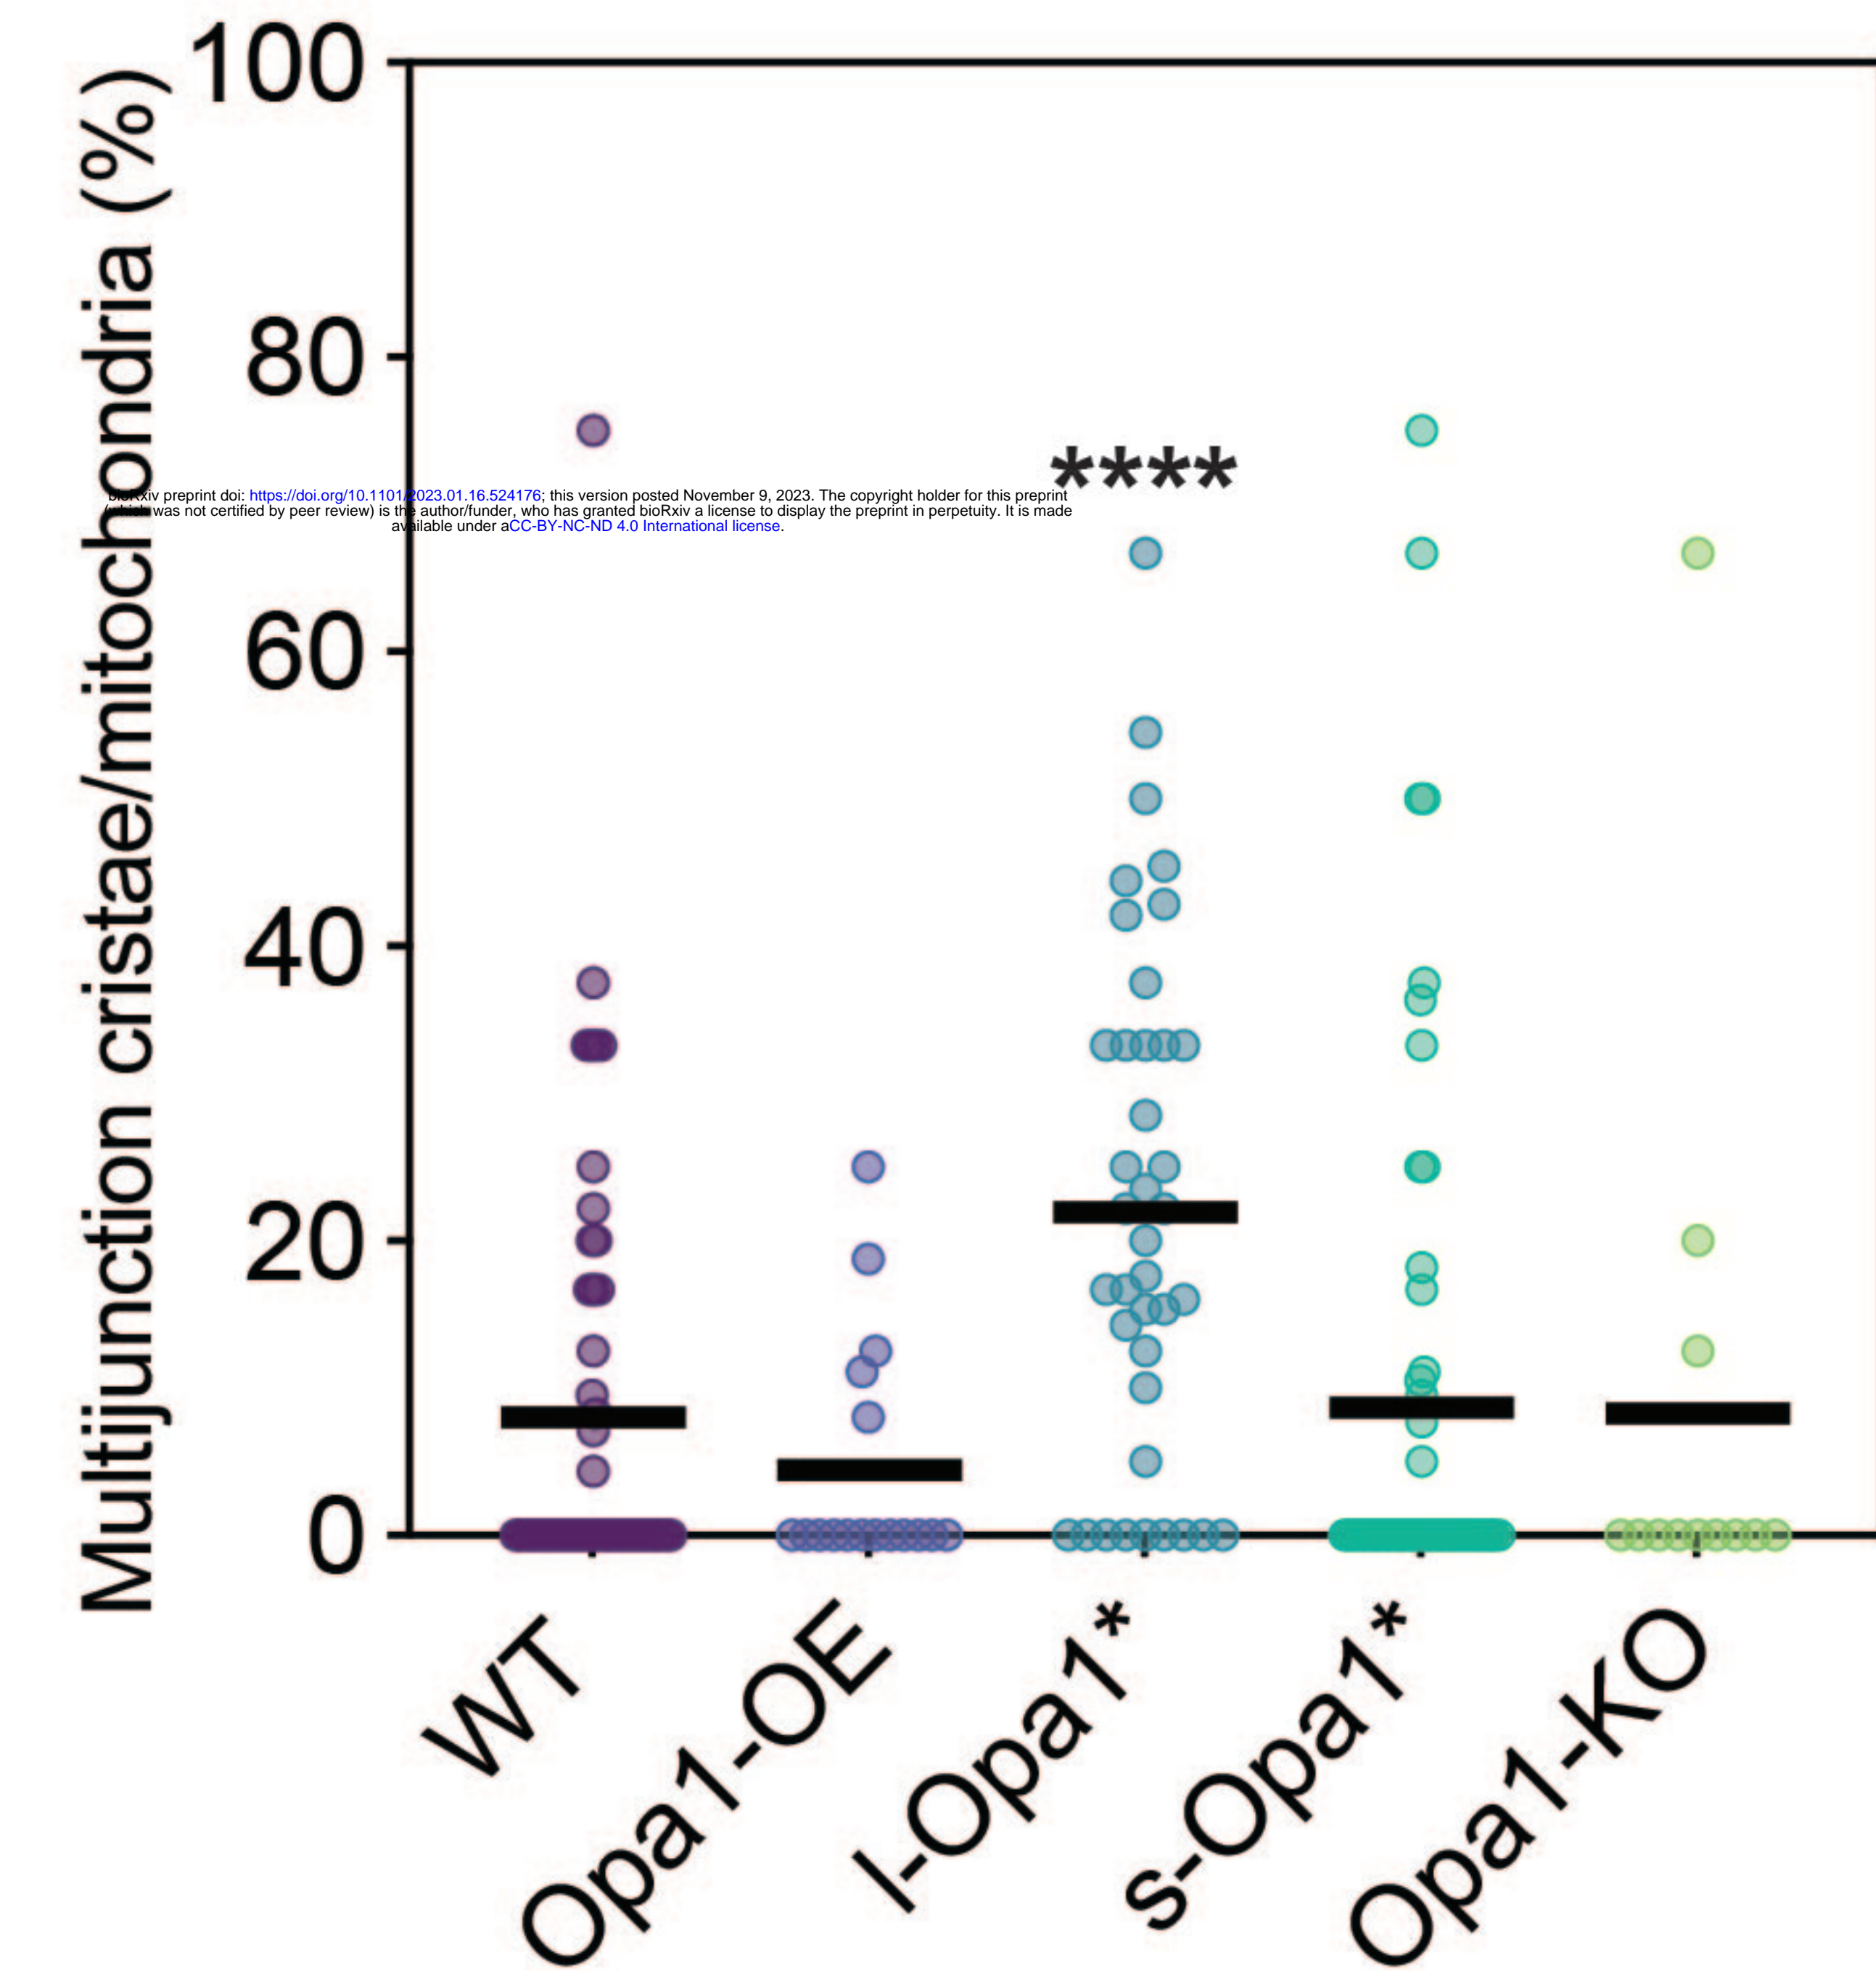

b

## Types of multijunction cristae

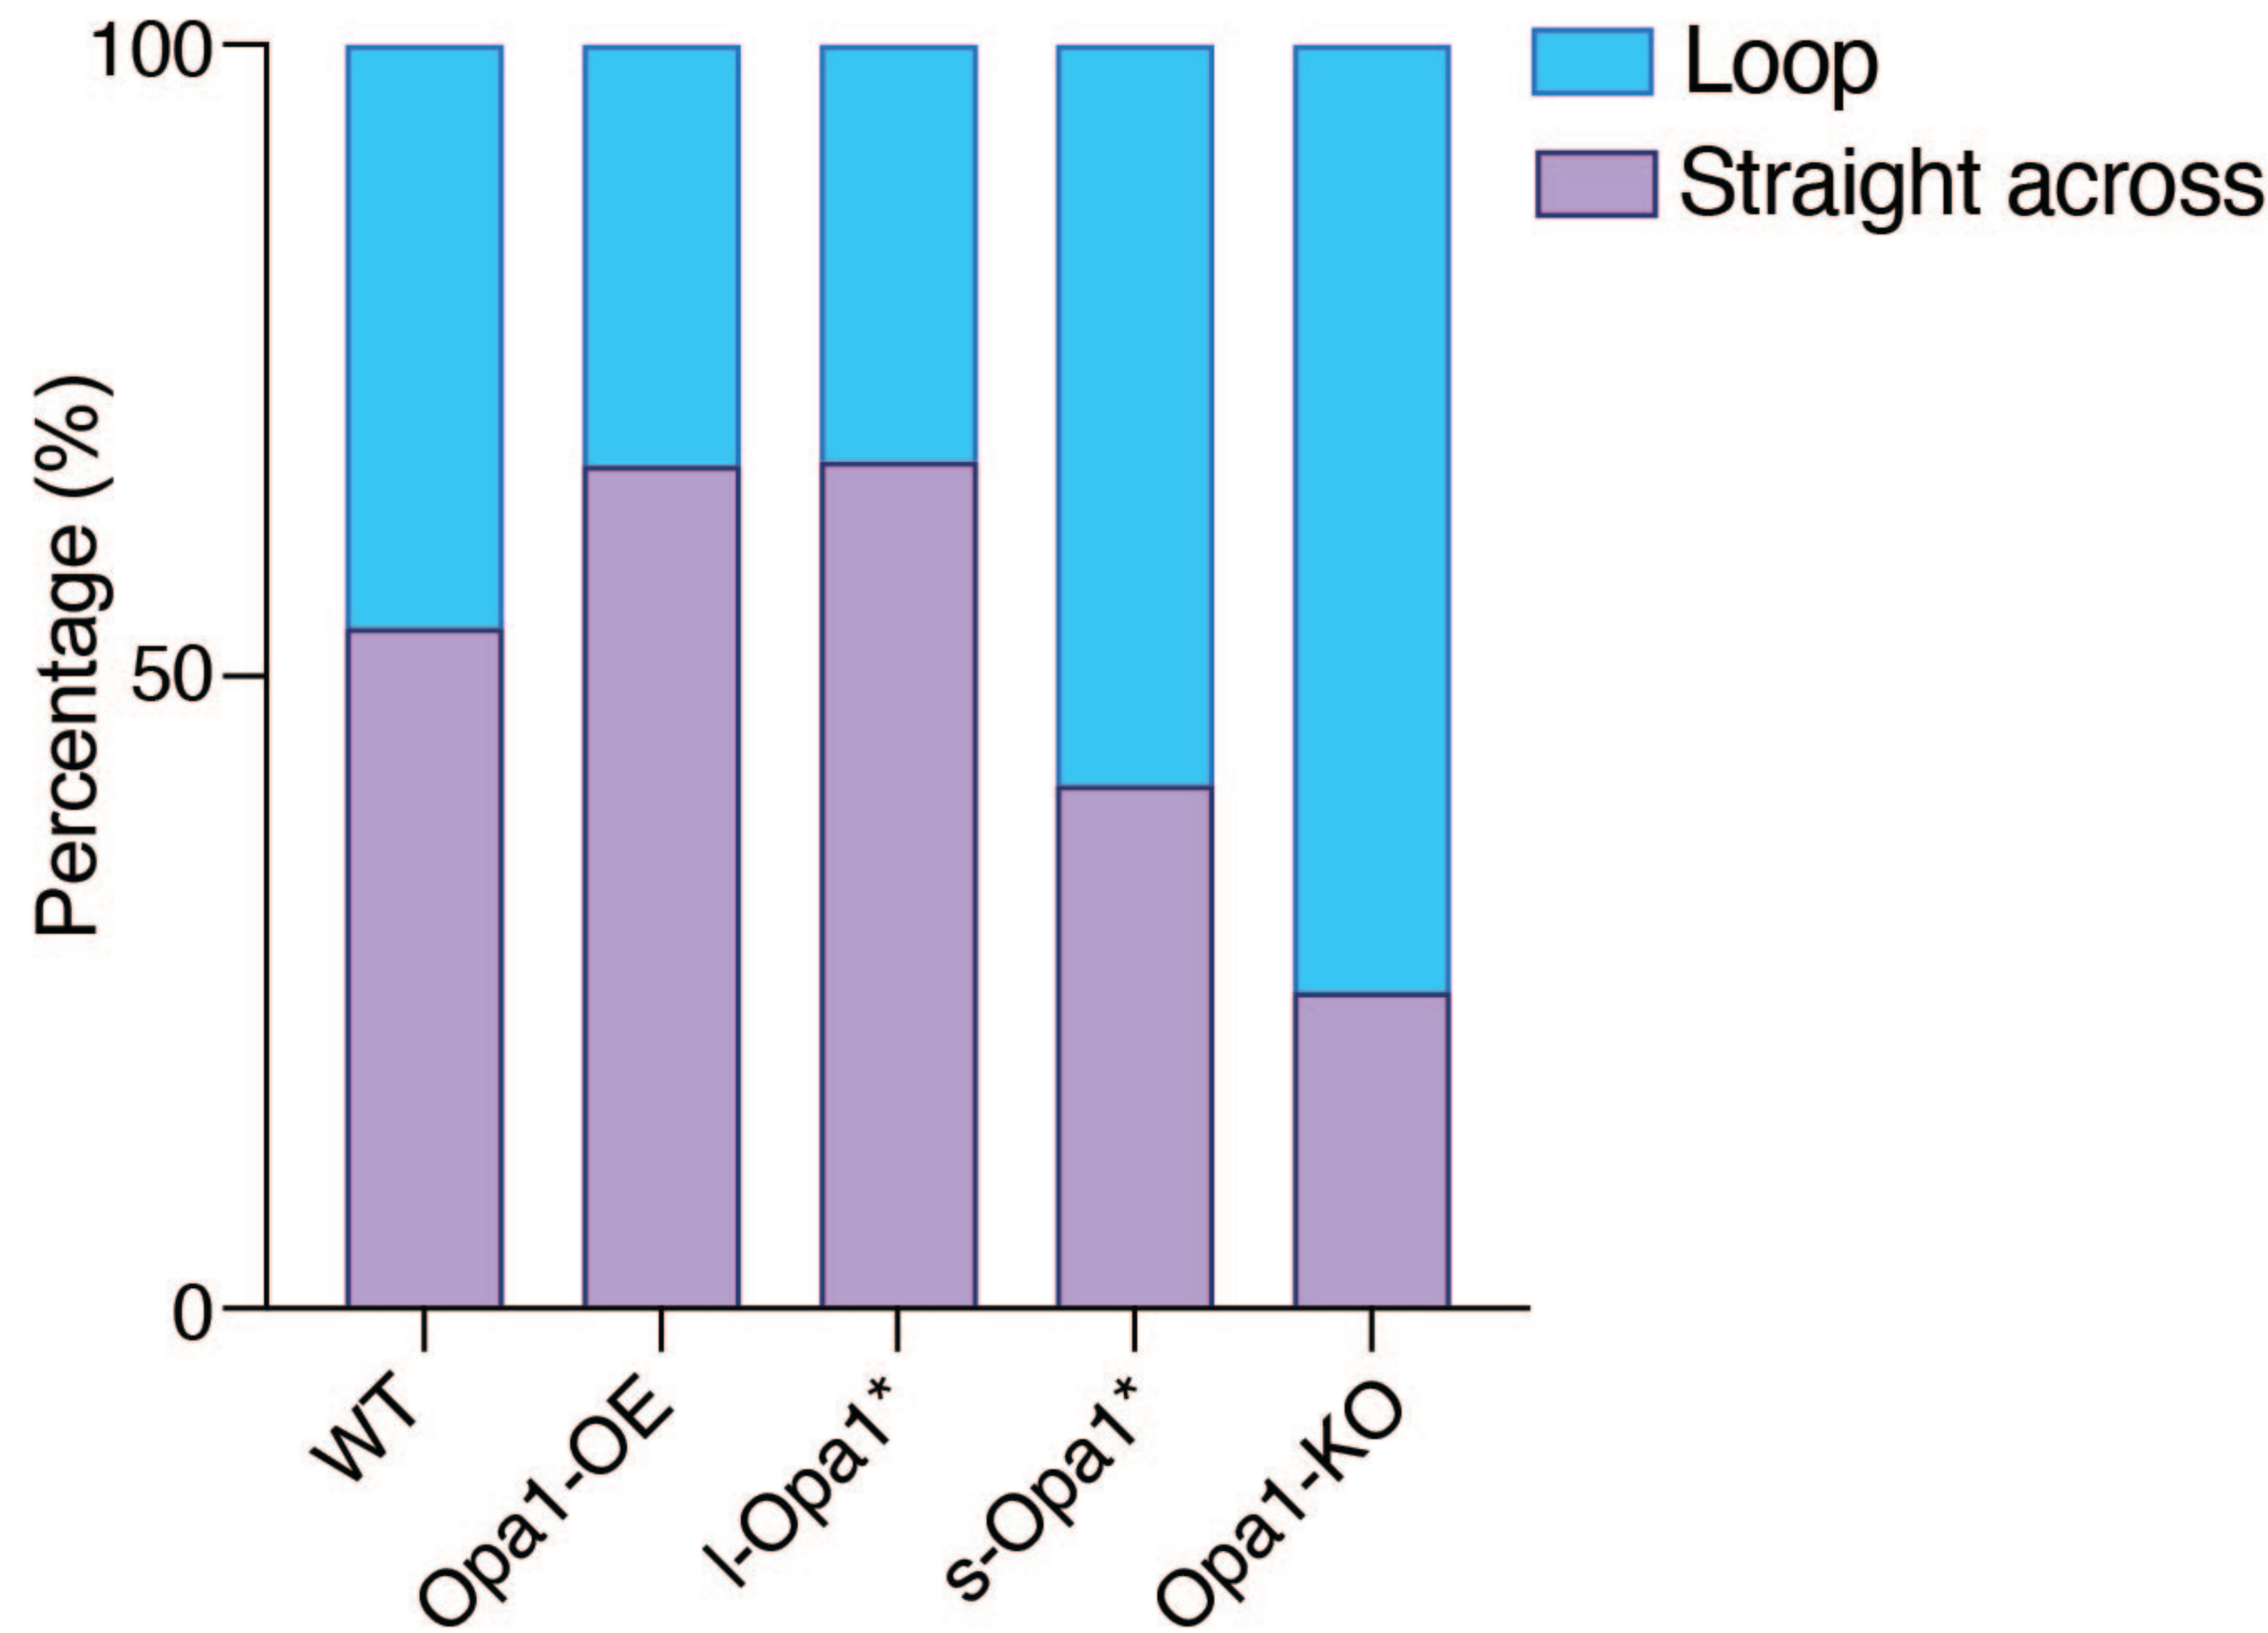

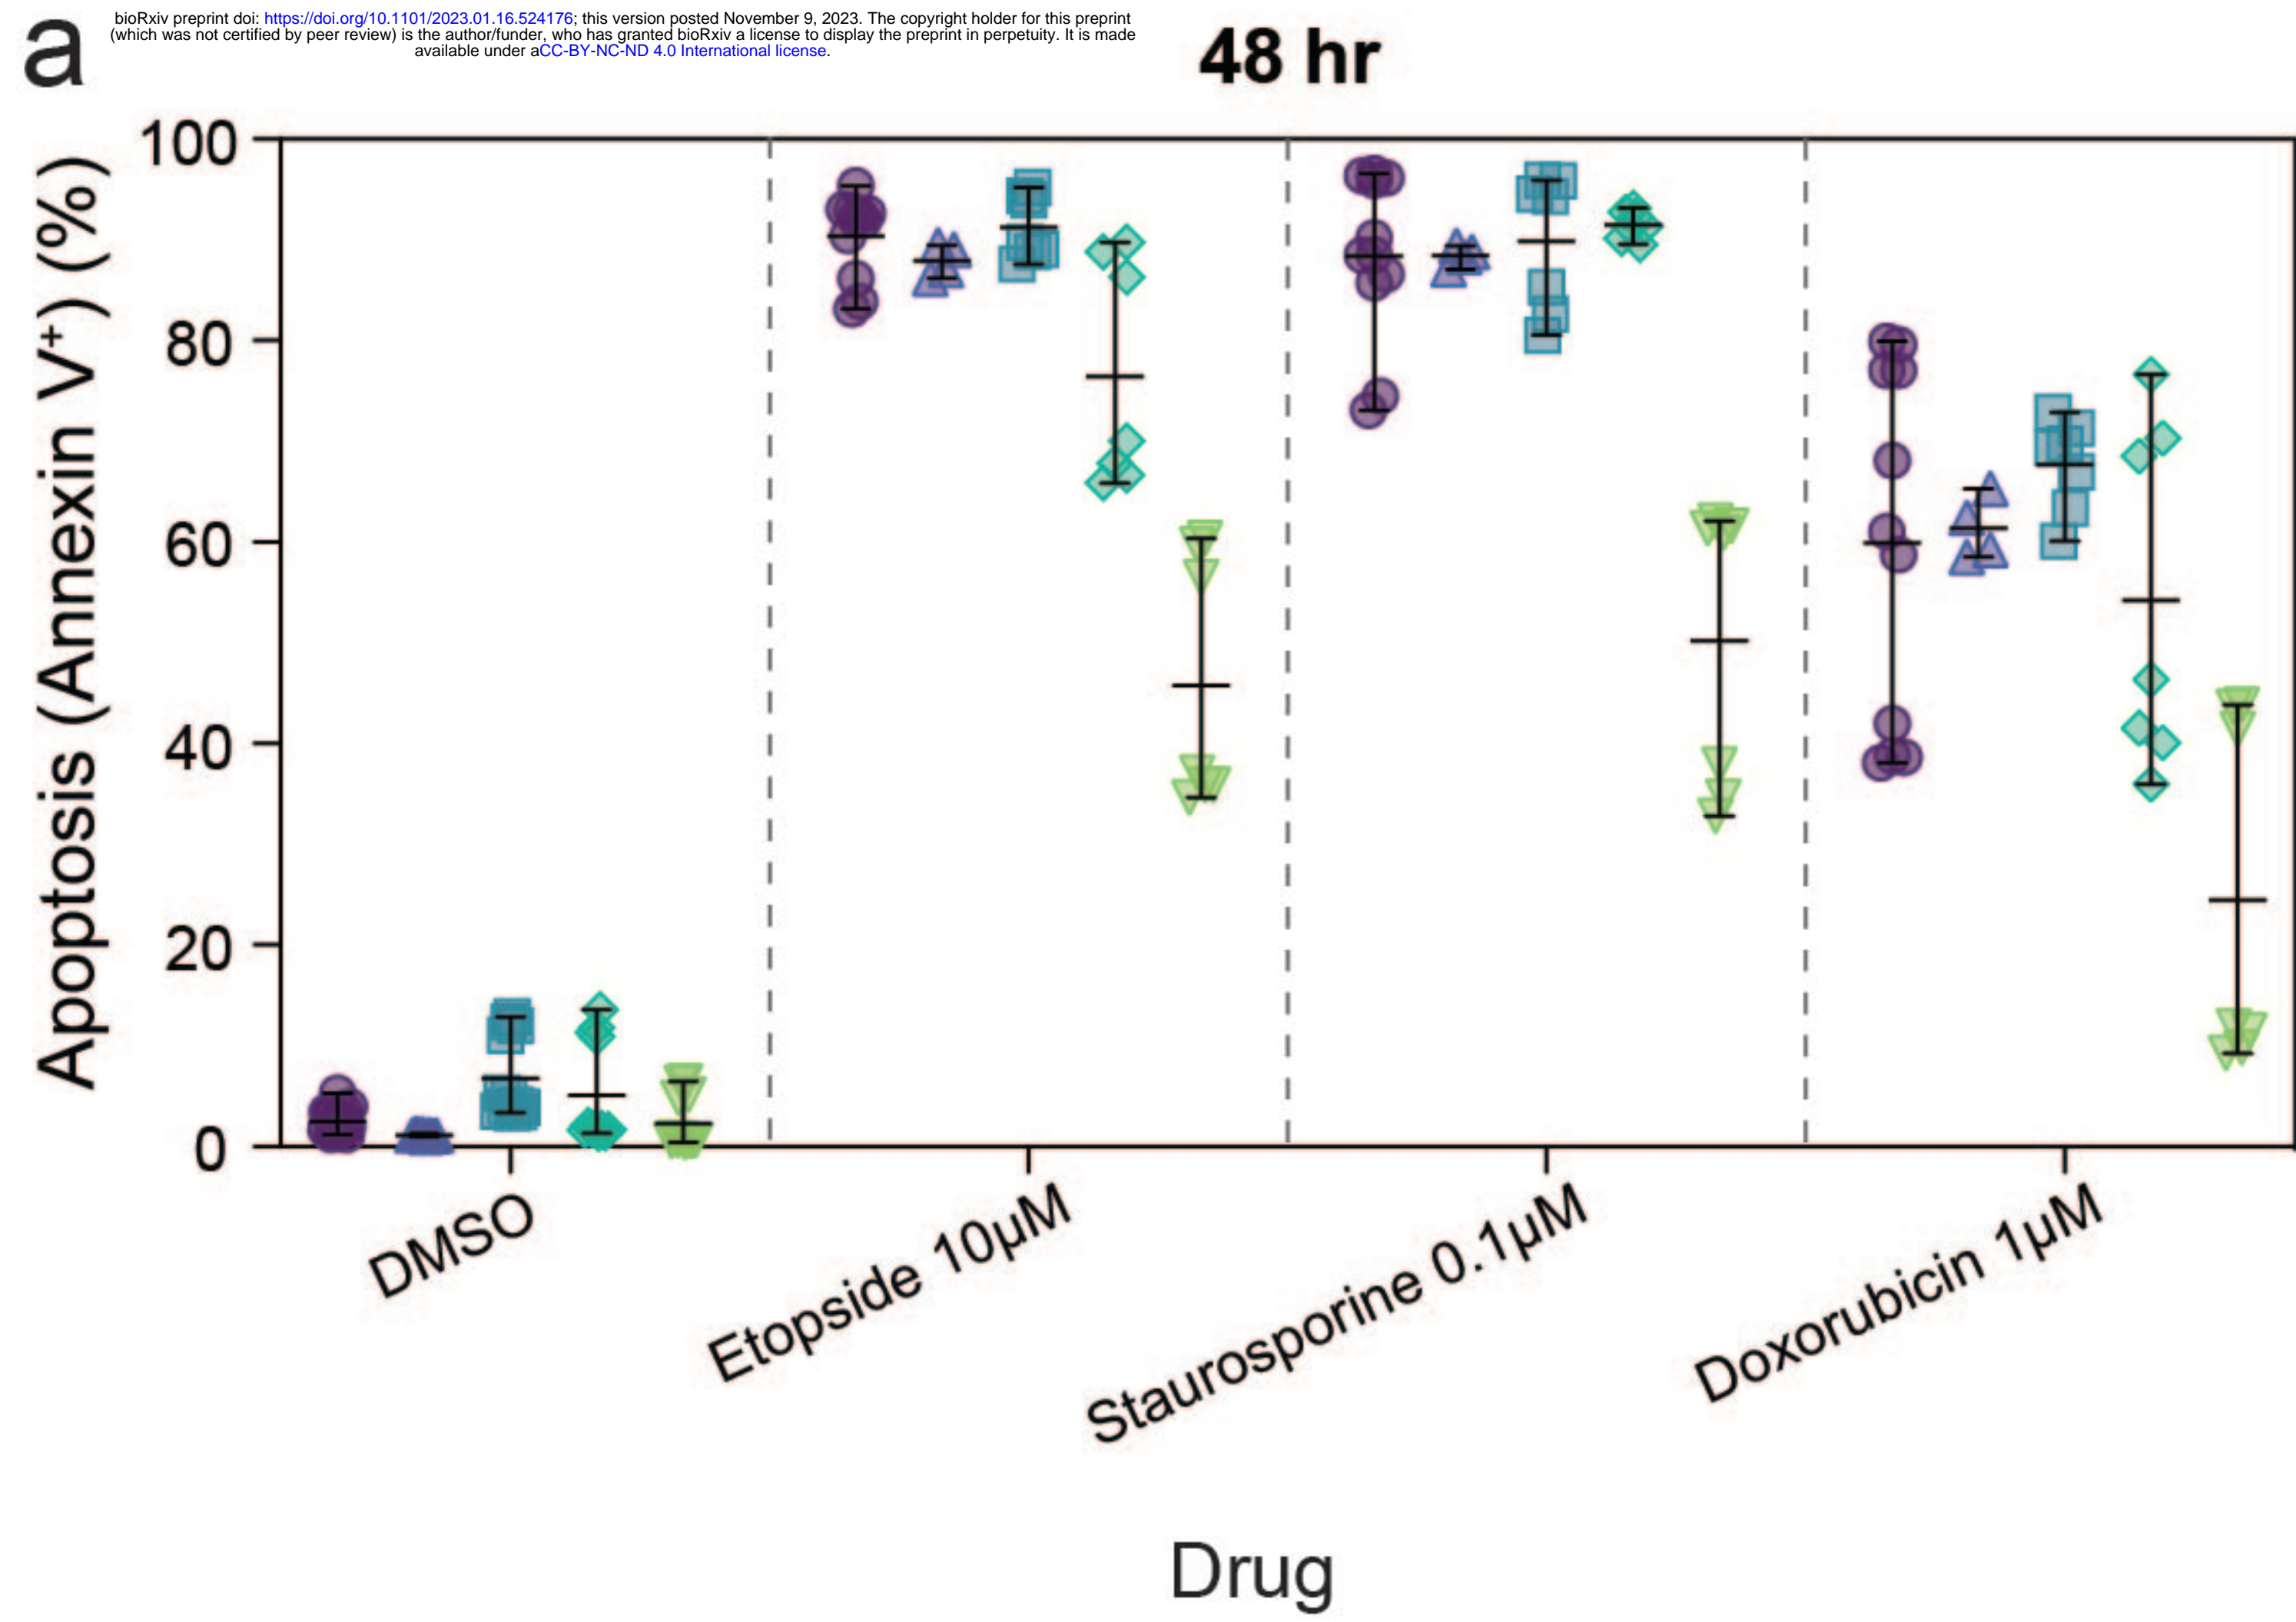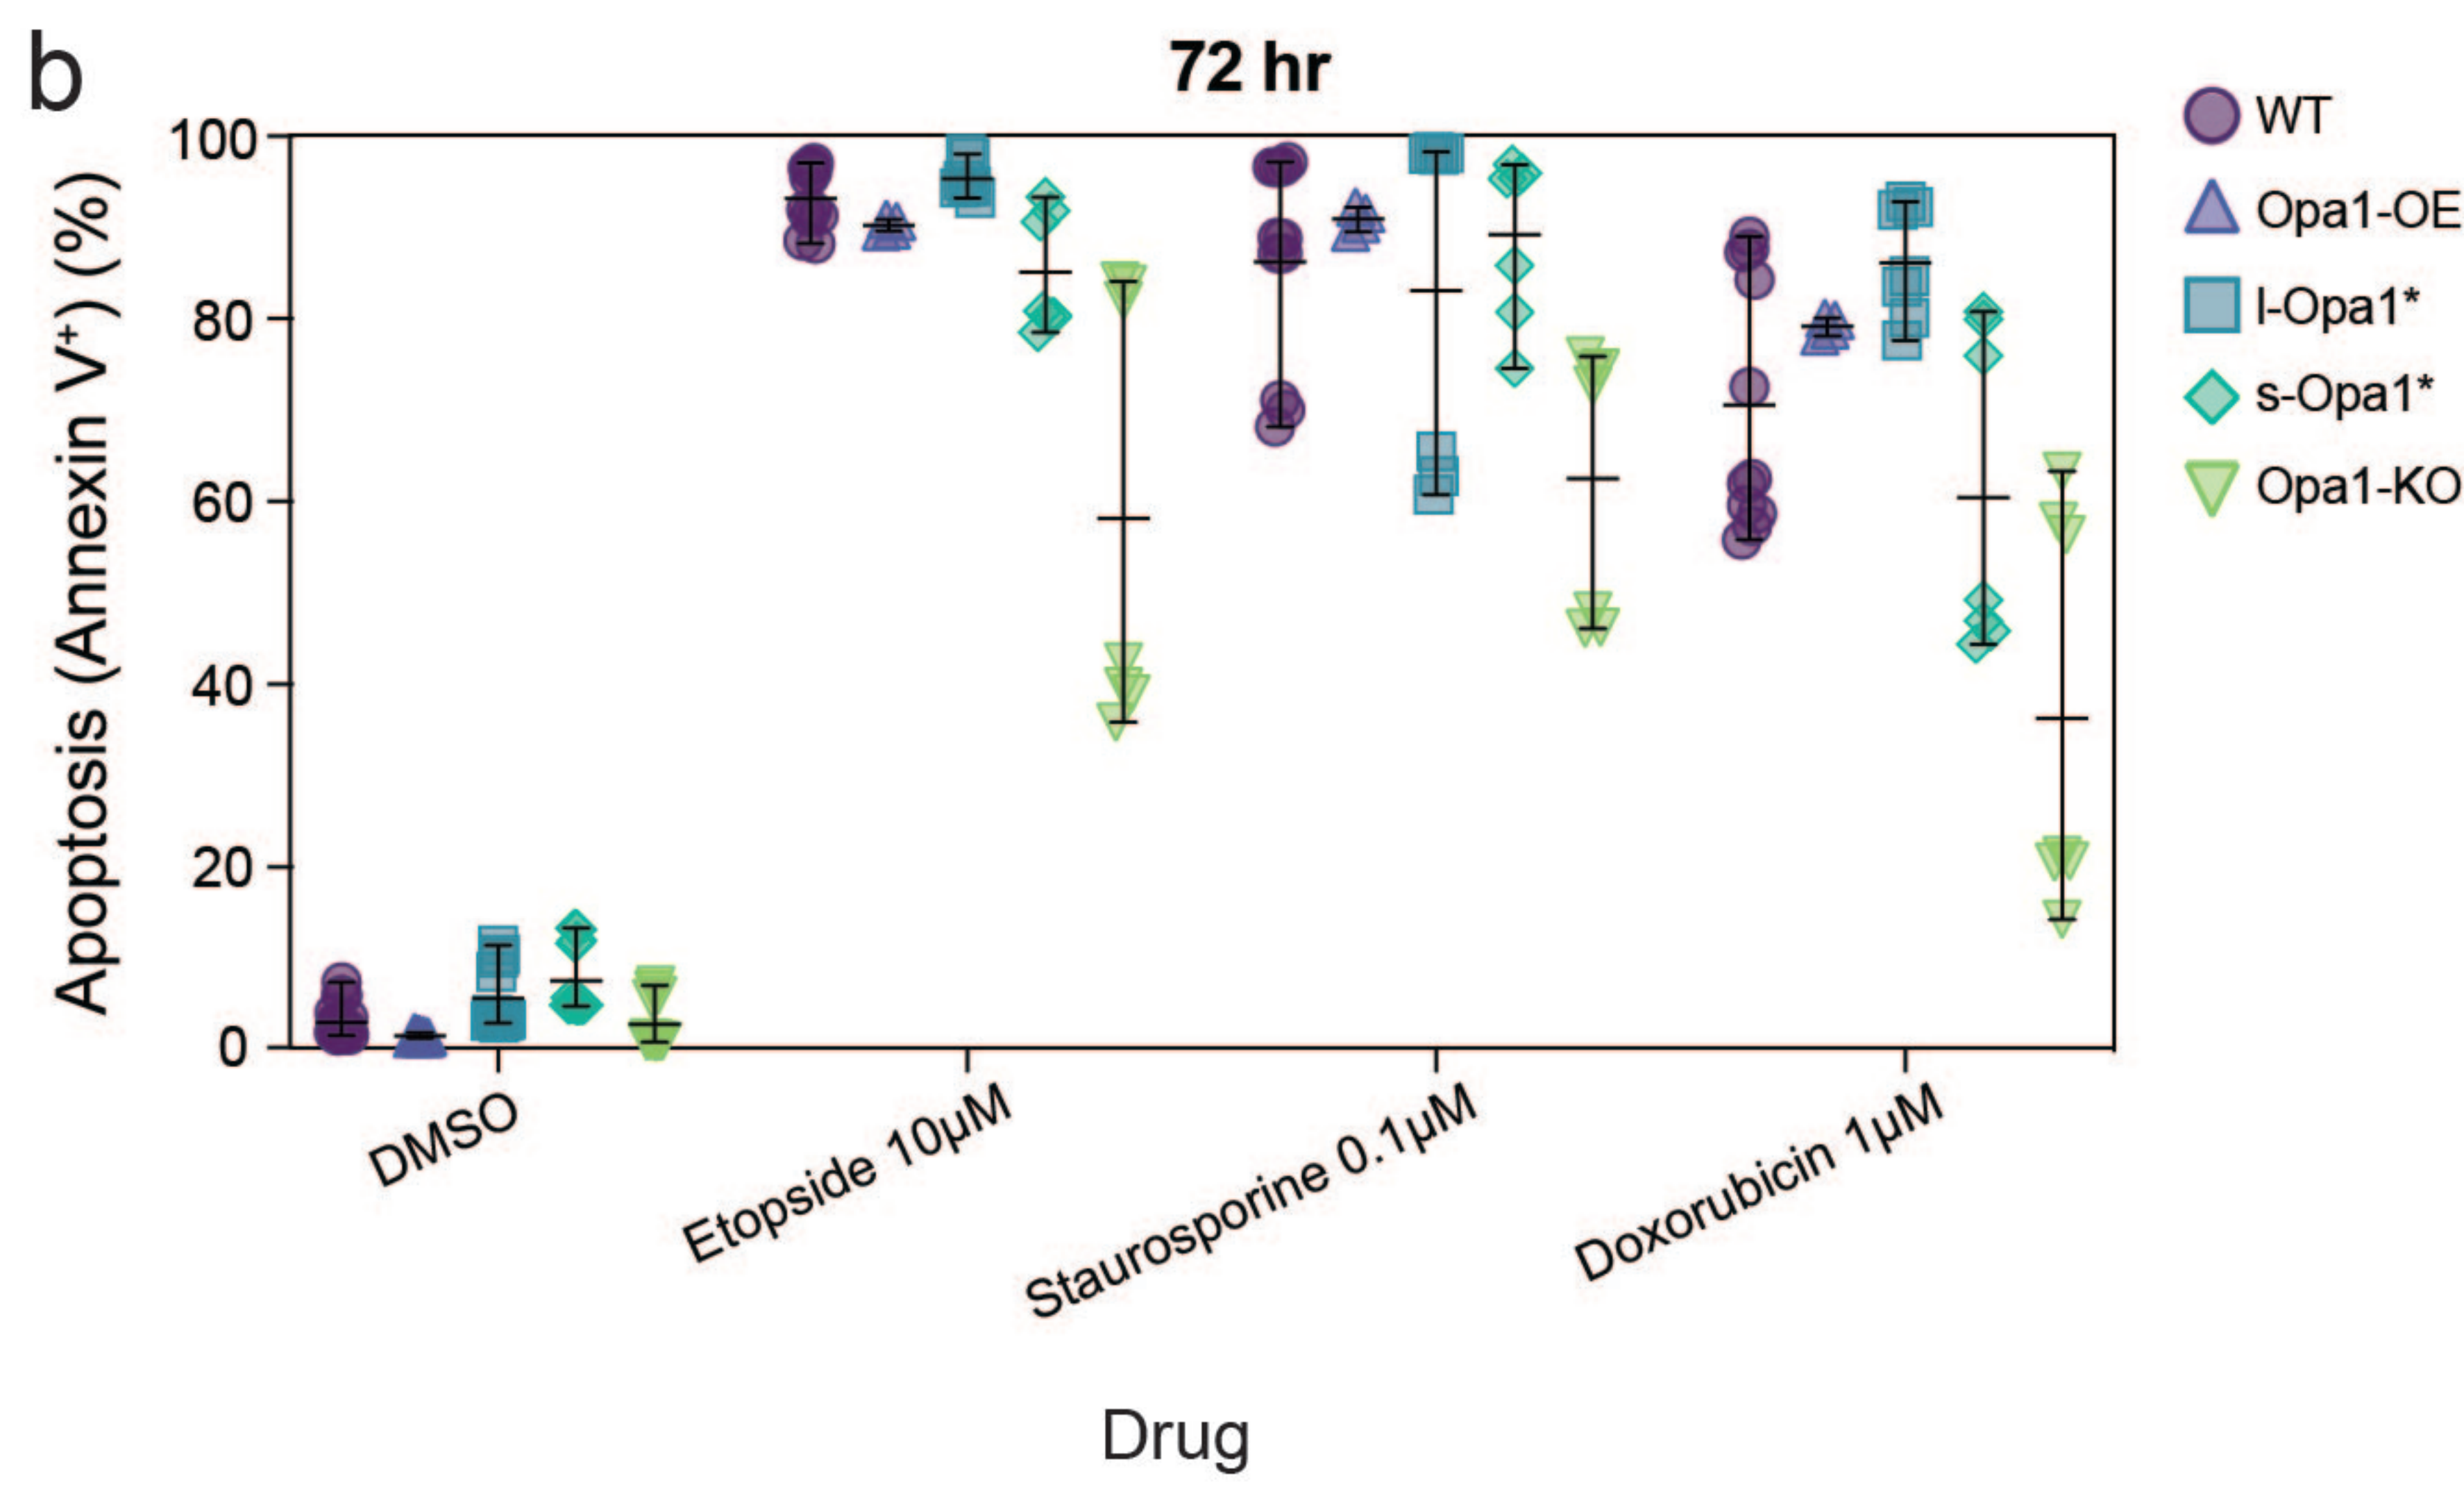

**a**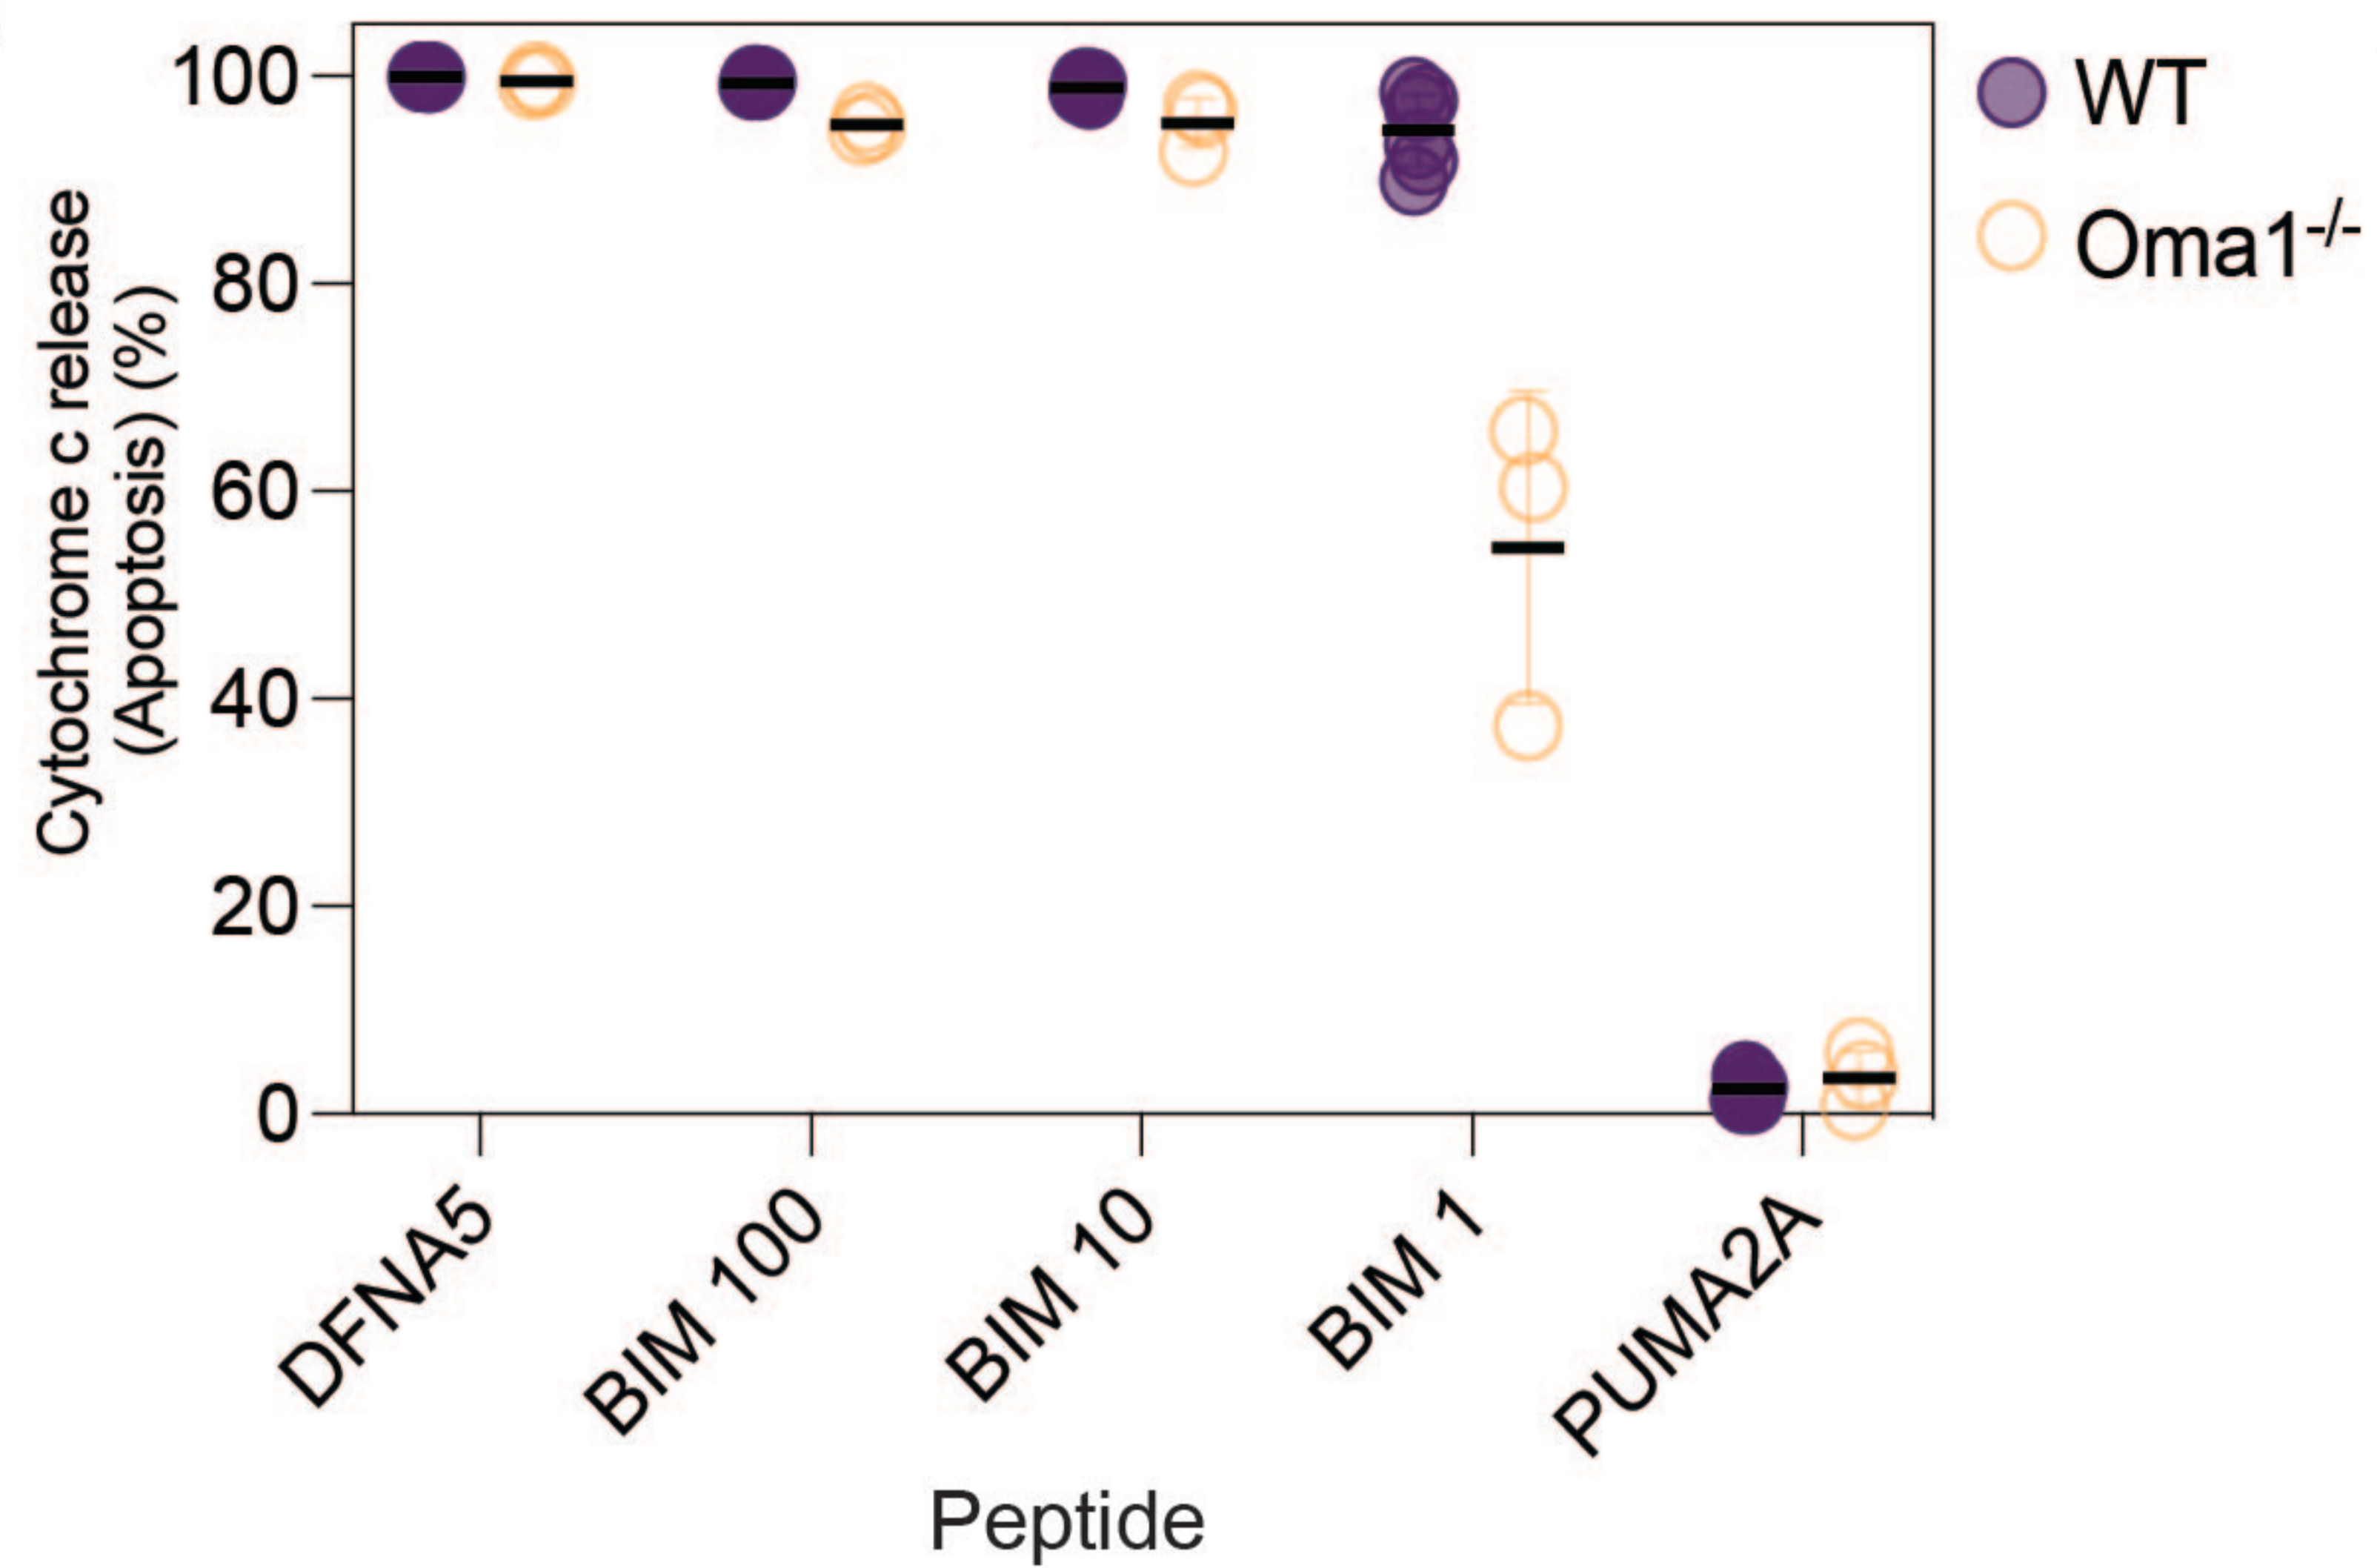**b**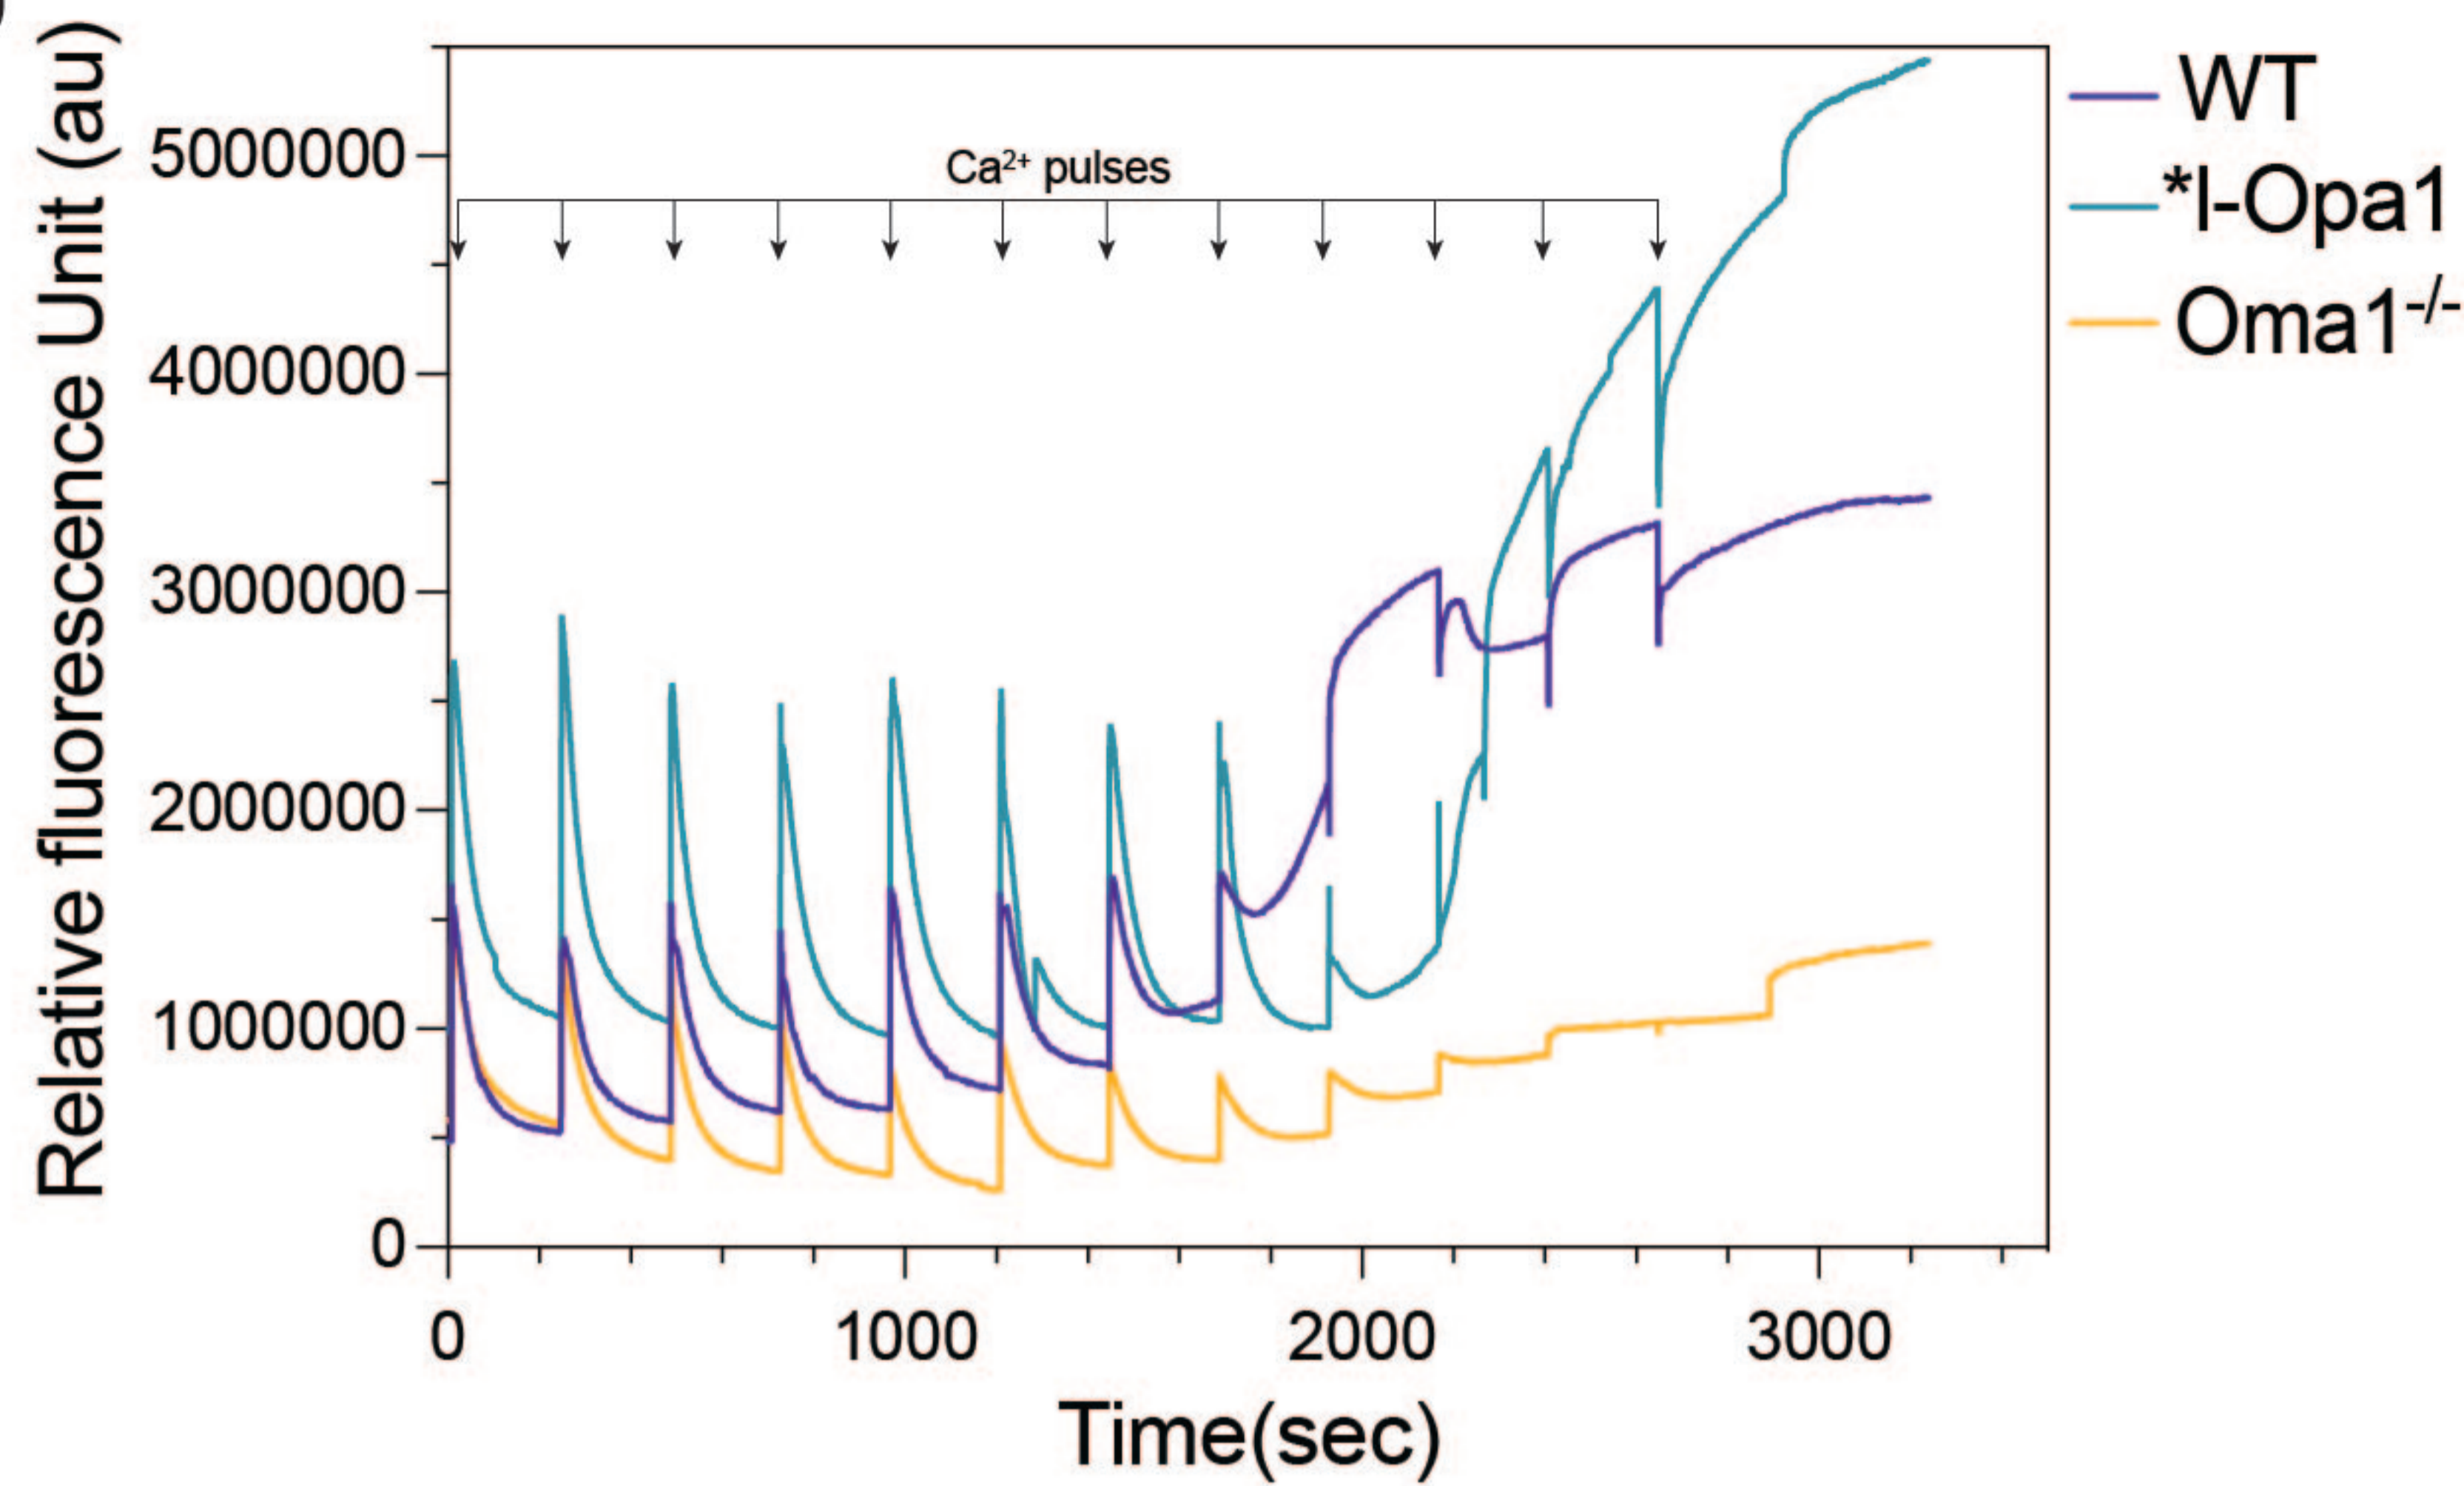**c**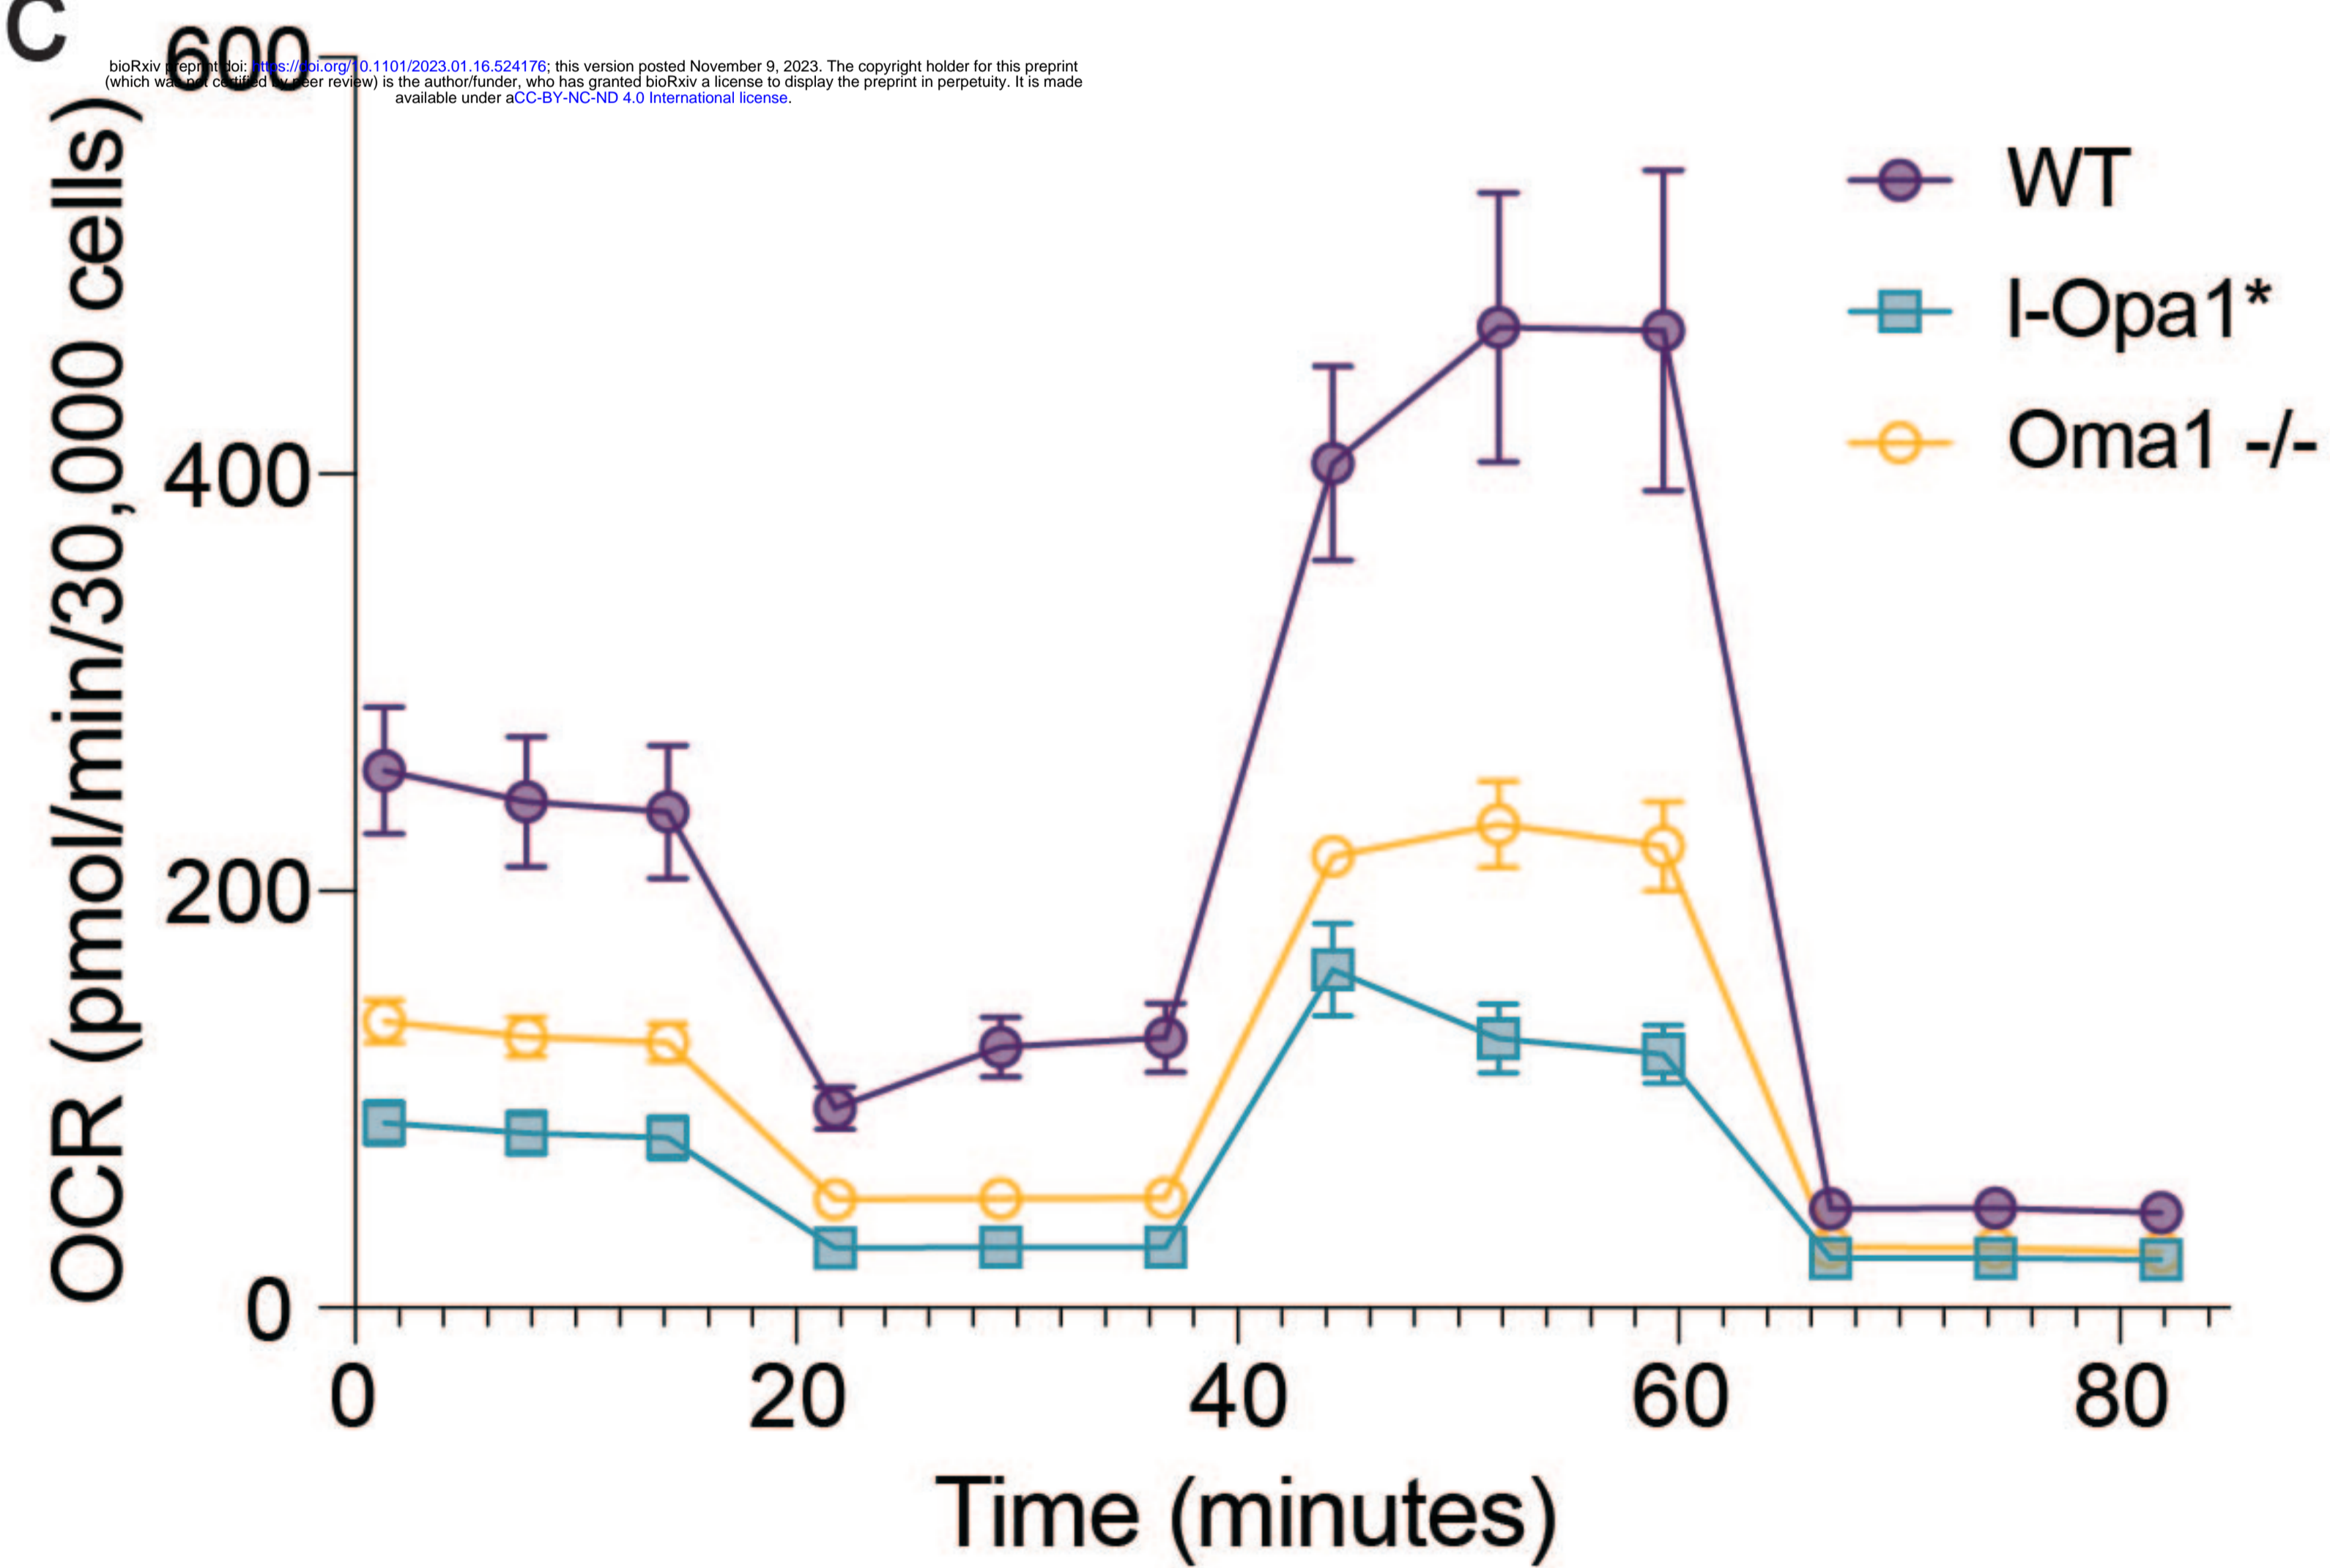**d**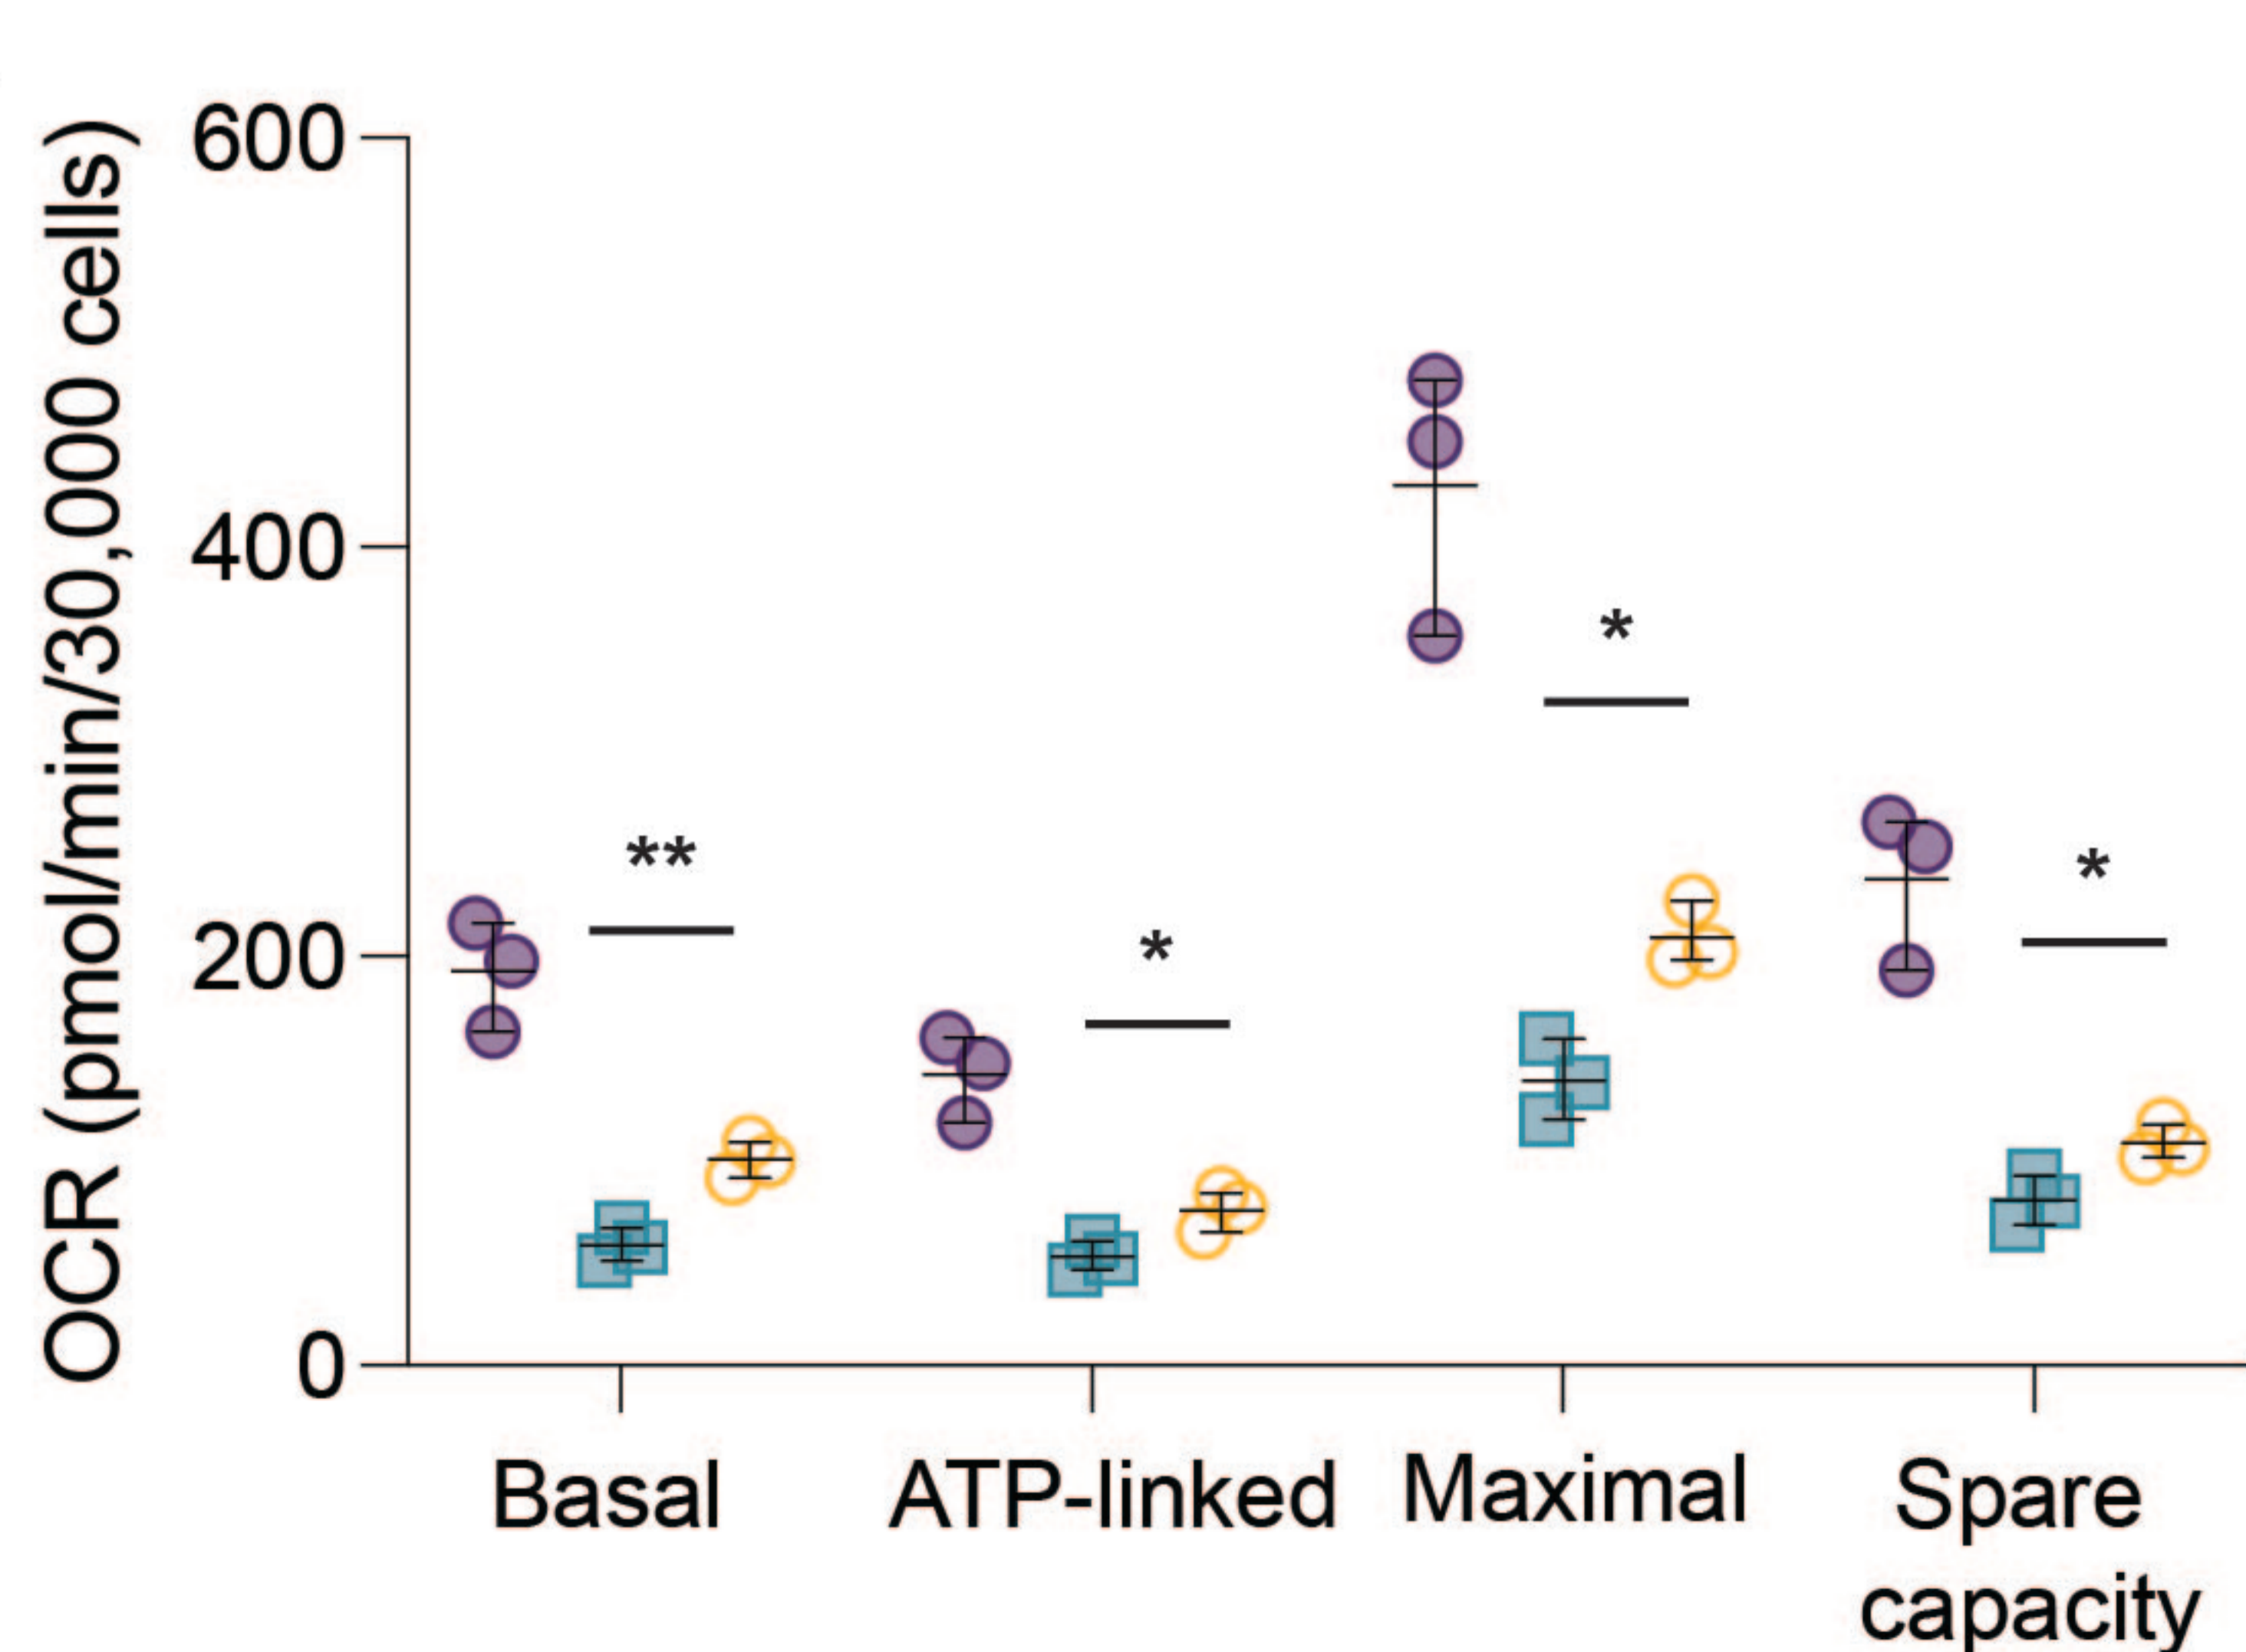

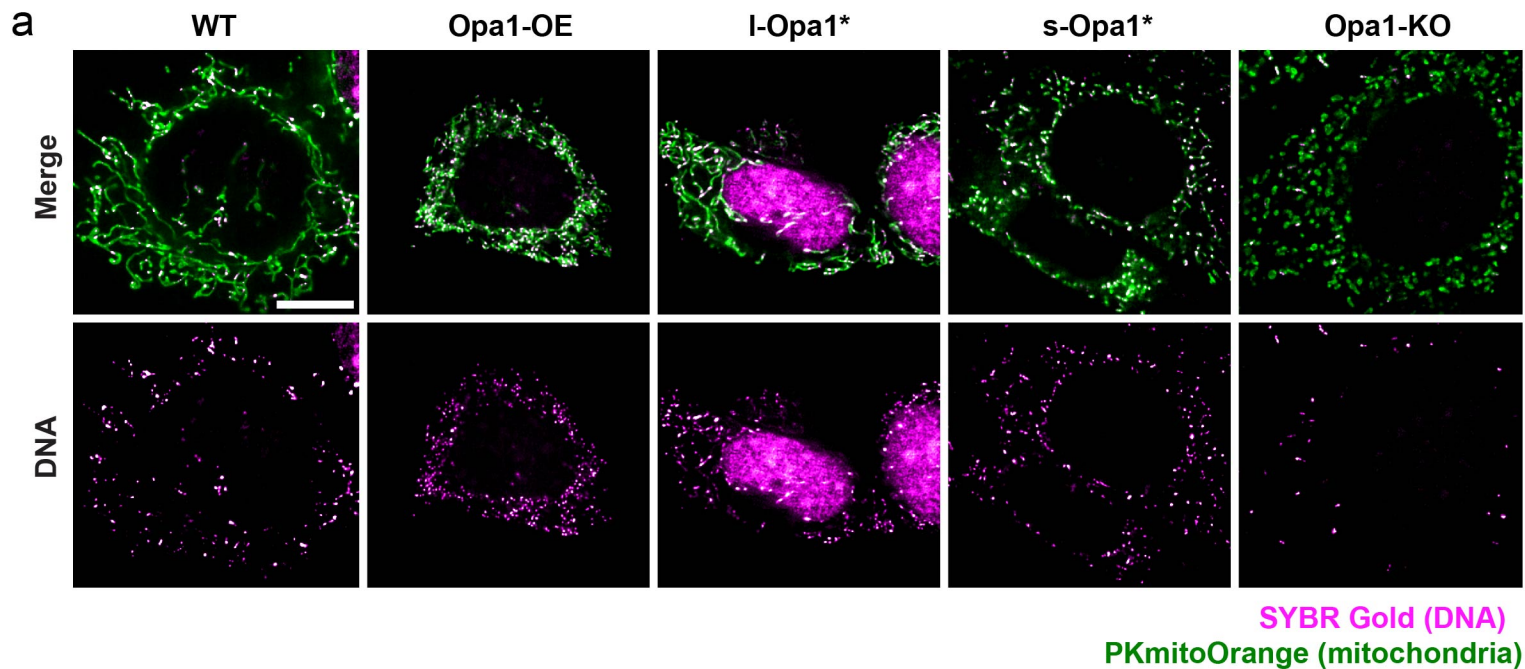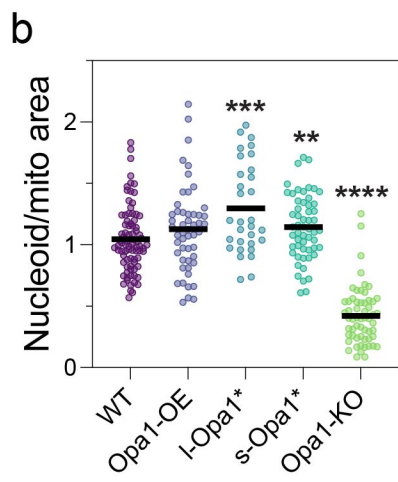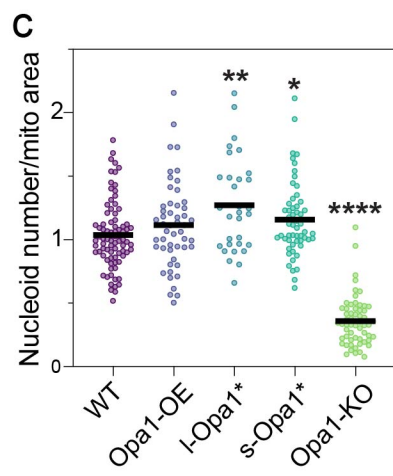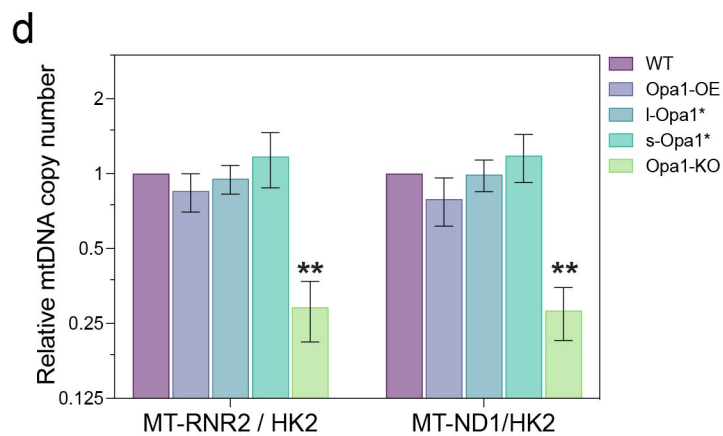

**Supplementary Table 1. Summary of data acquisition and image processing for cryo-ET data in this study.**

| Sample                  |                                           | wt                                               | Opa1-OE                                          | l-Opa1*                                          | s-Opa1*                                          | Opa1-KO                                          |
|-------------------------|-------------------------------------------|--------------------------------------------------|--------------------------------------------------|--------------------------------------------------|--------------------------------------------------|--------------------------------------------------|
| <b>Cryo-FIB milling</b> | <b>Microscope</b>                         | Aquilos Cryo-FIB, FEI – Thermo Fisher Scientific |
|                         | <b>Acquisition settings</b>               | Titan Krios Gi3 FEI, Thermo Fisher Scientific    |
|                         | <b>Voltage (KeV)</b>                      | 300                                              | 300                                              | 300                                              | 300                                              | 300                                              |
|                         | <b>Detector</b>                           | Gatan K3 IS                                      |
|                         | <b>Energy filter</b>                      | Gatan BioQuantum K3                              |
|                         | <b>Slit width (eV)</b>                    | 20                                               | 20                                               | 20                                               | 20                                               | 20                                               |
|                         | <b>Super-resolution mode</b>              | Yes                                              | Yes                                              | Yes                                              | Yes                                              | Yes                                              |
|                         | <b>Å/pixel</b>                            | 2.076                                            | 2.076                                            | 2.076                                            | 2.076                                            | 2.076                                            |
|                         | <b>Defocus (µm)</b>                       | -3.5 to -5.0                                     |
|                         | <b>Acquisition scheme</b>                 | -70/70, 2°, Dose-symmetric                       |
|                         | <b>Total dose</b>                         | ~90 - 120                                        | ~90 - 180                                        | ~90 - 180                                        | ~90 - 120                                        | ~90 - 120                                        |
|                         | <b>Dose rate (e-/Å/sec)</b>               | ~ 2.5 – 3.5                                      | ~ 2.5 – 3.5                                      | ~ 2.5 – 3.5                                      | ~ 2.5 – 3.5                                      | ~ 2.5 – 3.5                                      |
|                         | <b>Frame number</b>                       | 6                                                | 6                                                | 6                                                | 6                                                | 6                                                |
|                         | <b>Number of tomograms</b>                | 33                                               | 7                                                | 27                                               | 22                                               | 11                                               |
| <b>Image processing</b> | <b>Frame alignment and dose weighting</b> | <i>framealign</i> , IMOD                         | <i>framealign</i> , IMOD                         | <i>framealign</i> , IMOD                         | <i>framealign</i> , IMOD <sup>7</sup>            | <i>framealign</i> , IMOD <sup>7</sup>            |
|                         | <b>Tilt series alignment</b>              | IMOD                                             | IMOD                                             | IMOD                                             | IMOD                                             | IMOD                                             |
|                         | <b>WBP</b>                                | IMOD                                             | IMOD                                             | IMOD                                             | IMOD                                             | IMOD                                             |
|                         | <b>Denoising</b>                          | Topaz                                            | Topaz                                            | Topaz                                            | Topaz                                            | Topaz                                            |
|                         | <b>3D-segmentation</b>                    | Amira                                            | Amira                                            | Amira                                            | Amira                                            | Amira                                            |
|                         | <b>3D-rendering</b>                       | Amira                                            | Amira                                            | Amira                                            | Amira                                            | Amira                                            |
